# Supplementary material for: Organocatalytic dynamic kinetic resolution via conjugate addition: synthesis of chiral trans-2,5-dialkylcyclohexanones
Source: Royal Society of Chemistry journal article supplement (doi:10.1039/c2ob26597d), 2012-01-01
Supplement: c2ob26597d.pdf [file c2ob26597d.pdf]

## Supporting information

### **Organocatalytic dynamic kinetic resolution *via* conjugate addition: synthesis of chiral *trans*-2, 5-dialkylcyclohexanones.**

Ganesh Pandey\*<sup>a</sup>, Priyanka Adate<sup>a</sup>, Vedavati G. Puranik<sup>b</sup>

<sup>a</sup> *Dr. Ganesh Pandey, Division of Organic chemistry, National Chemical Laboratory, Pune-411 008 (India),  
Fax: (+91) 202590-2628  
E-mail: [gp.pandey@ncl.res.in](mailto:gp.pandey@ncl.res.in)*

<sup>b</sup> *Dr. Vedavati G. Puranik (Crystallographer), Centre for Material Characterization, National Chemical Laboratory  
Pune-411 008 (India)*

**General procedure for synthesis of enone starting from corresponding ketone<sup>1</sup>:** To a cold (-78°C) solution of ketone (2.0 mmol, 1.0 equiv.) in THF (20 mL) was added LiHMDS (5.0 mmol, 2.5equiv. 1.0 M in hexanes) dropwise over period of 10 min. After stirring for 30 min. at same temperature, TMSCl (5.0 mmol, 2.5 equiv.) was added drop wise over period of 5 min and reaction mixture was stirred for another 30 min, and then warmed to room temperature. Upon disappearance of the starting material (checked by TLC), the reaction mixture was poured in water (10 mL), and the biphasic reaction mixture was extracted with EtOAc (3 × 20 mL), and the combined organic layers were washed with brine (1 × 20 mL), and concentrated. The crude TMS enol ether was vacuum-dried to minimize the amount of (TMS)<sub>2</sub>O present, as this was known to be detrimental for the desired reaction. IBX and MPO (4.0 equiv.) were dissolved in DMSO (0.4 M) in an equimolar ratio at room temperature. The IBX.MPO solution was added in one portion at ambient temperature to the crude TMS enol ether dissolved in a minimum of DMSO. Reaction mixture was stirred vigorously, and progress was monitored by means of thin-layer chromatography. Upon completion, the reaction mixture was diluted with aqueous NaHCO<sub>3</sub> (5%) and extracted with EtOAc (3 times). The combined organic phase was filtered through a pad of celite and washed with saturated aqueous NaHCO<sub>3</sub>, water, and brine. After drying over anhy. NaSO<sub>4</sub>, the solvent was removed in vacuum to yield the crude product, which was further purified further by means of column chromatography.

**Ethyl 3-(8-oxo-1,4-dioxaspiro[4.5]dec-9-en-7-yl)propanoate 6:** yellow solid, yield = 95%, M.P. = 55°C, IR ( $\nu_{\max}$  cm<sup>-1</sup> CHCl<sub>3</sub>): 2981, 3892, 1731, 1683, 1421, 1447, 1380, 1252, 1195, 1096, 1031, 949. <sup>1</sup>H NMR (400 MHz, CDCl<sub>3</sub>)  $\delta$  ppm: 1.26 (t, *J* = 7.1 Hz, 3 H), 1.75 (d, *J* = 6.3 Hz, 1 H), 2.00 - 2.08 (m, 1 H), 2.11 - 2.23 (m, 2 H), 2.38 - 2.46 (m, 2 H), 2.68 - 2.78 (m, 1 H), 3.94 - 4.18 (m, 6 H), 5.99 (d, *J* = 10.0 Hz, 1 H), 6.56 (dd, *J* = 10.2, 1.9 Hz, 1 H). <sup>13</sup>C NMR (50 MHz, CDCl<sub>3</sub>)  $\delta$  ppm: 14.2, 24.7, 31.6, 38.6, 43.6, 60.4, 64.9, 65.2, 104.2, 130.2, 145.2, 173.3, 200.2. *m/z*: 409.14 (M + Na, 100), 387.2 (M+H, 25), 341(45), 249 (16), 241(22).

**5-allylcyclopent-2-enone 7:** colourless liquid, yield = 75%, IR ( $\nu_{\max}$  cm<sup>-1</sup> CHCl<sub>3</sub>): 3019, 2983, 1701, 1588, 1429, 1215, 1046, 755, 669. <sup>1</sup>H NMR (500 MHz, CDCl<sub>3</sub>)  $\delta$  ppm: 2.10 - 2.18 (m, 1 H), 2.37 - 2.45 (m, 2 H), 2.50 - 2.58 (m, 1 H), 2.79 - 2.87 (m, 1 H), 4.98 - 5.14 (m, 2 H), 5.74 (ddt, *J* = 17.0, 10.1, 6.9 Hz, 1 H), 6.10 - 6.24 (m, 1 H), 7.63 - 7.76 (m, 1 H). <sup>13</sup>C NMR (126

MHz, CDCl<sub>3</sub>)  $\delta$  ppm: 34.8, 35.2, 43.9, 116.9, 133.7, 135.1, 163.8, 211.6. **m/z**: 145.46 (M + Na, 100), 123.16 (M+H, 25).

**6-allylcyclohex-2-enone 8**: pale yellow liquid, yield = 90%, **IR** ( $\nu_{\max}$  cm<sup>-1</sup> CHCl<sub>3</sub>): 2930, 2862, 1677, 1639, 1388, 1222, 912. **<sup>1</sup>H NMR** (500 MHz, CDCl<sub>3</sub>)  $\delta$  ppm: 1.68 – 1.82 (m, 1H), 2.07 - 2.17 (m, 2 H), 2.31 - 2.41 (m, 3 H), 2.59 - 2.66 (m, 1 H), 5.02 - 5.09 (m, 2 H), 5.73 - 5.83 (m, 1 H), 6.00 (dt,  $J$  = 9.99, 1.72 Hz, 1 H), 6.91 - 6.98 (m, 1 H). **<sup>13</sup>C NMR** (50 MHz, CDCl<sub>3</sub>)  $\delta$  ppm: 25.2, 27.3, 33.6, 46.1, 116.7, 129.5, 136.1, 149.8, 200.9. **m/z**: 159.15 (M + Na, 100), 137.45 (M+H, 25).

**7-allylcyclohept-2-enone 9**: colourless liquid, yield = 87%, **IR** ( $\nu_{\max}$  cm<sup>-1</sup> CHCl<sub>3</sub>): 3017, 2931, 1705, 1454, 1216, 1048, 915, 755, 667. **<sup>1</sup>H NMR** (400 MHz, CDCl<sub>3</sub>)  $\delta$  ppm 1.43 - 1.53 (m, 1 H), 1.65 - 1.75 (m, 1 H), 1.84 - 1.98 (m, 2 H), 2.05 - 2.19 (m, 1 H), 2.39 - 2.50 (m, 2 H), 2.52 - 2.61 (m, 1 H), 2.63 - 2.74 (m, 1 H), 4.97 - 5.09 (m, 2 H), 5.77 (ddt,  $J$  = 17.0, 10.1, 6.9, 6.9 Hz, 1 H), 5.99 - 6.07 (m, 1 H), 6.61 (ddd,  $J$  = 11.7, 6.6, 4.5 Hz, 1 H). **<sup>13</sup>C NMR** (101 MHz, CDCl<sub>3</sub>)  $\delta$  ppm: 25.2, 28.7, 29.8, 35.7, 51.6, 116.6, 132.7, 136.4, 146.0, 205.2. **m/z**: 183.16 (M + Na, 100), 151.49 (M + H, 51).

**9-(((tert-butyldimethylsilyl)oxy)methyl)-1,4-dioxaspiro[4.5]dec-6-en-8-one 11**: yield = 95%, colourless liquid, **IR** ( $\nu_{\max}$  cm<sup>-1</sup> CHCl<sub>3</sub>): 3583, 3444, 2957, 2930, 1683, 1216, 1141, 758. **<sup>1</sup>H NMR** (400 MHz, CDCl<sub>3</sub>)  $\delta$  ppm: 0.05 (d,  $J$  = 2.0 Hz, 6 H), 0.87 (s, 9 H), 2.21 - 2.31 (m, 2 H), 2.73 - 2.82 (m, 1 H), 3.81 - 3.88 (m, 1 H), 3.91 - 4.00 (m, 2 H), 4.01 - 4.15 (m, 3 H), 5.99 (d,  $J$  = 10.0 Hz, 1 H), 6.60 (dd,  $J$  = 10.0, 1.7 Hz, 1 H). **<sup>13</sup>C NMR** (101 MHz, CDCl<sub>3</sub>)  $\delta$  ppm: 5.5, 18.2, 25.8, 35.5, 46.6, 61.4, 64.8, 65.1, 104.5, 130.5, 145.9, 198.8. **m/z**: 321.1((M + Na, 100), 310.3 (4), 283.1 (1).

**Ethyl 3-(2-oxocyclohex-3-en-1-yl)propanoate 12**: colourless liquid, **IR** ( $\nu_{\max}$  cm<sup>-1</sup> CHCl<sub>3</sub>): 2934, 1732, 1676, 1425, 1388, 1177, 1032. **<sup>1</sup>H NMR** (500 MHz, CDCl<sub>3</sub>)  $\delta$  ppm: 1.25 ( $J$  = 7.2, 3 H), 1.67 - 1.81 (m, 2 H), 2.07 - 2.18 (m, 2 H), 2.31 - 2.44 (m, 5 H), 4.12 (q,  $J$  = 7.1 Hz, 2 H), 5.98 (dt,  $J$  = 10.1, 1.9 Hz, 1 H), 6.89 - 6.96 (m, 1 H). **<sup>13</sup>C NMR** (126 MHz, CDCl<sub>3</sub>)  $\delta$  ppm: 14.1, 24.7, 25.2, 28.1, 31.8, 45.7, 60.3, 129.4, 149.5, 173.5, 201.1. **m/z**: 219.15 (M + Na, 100), 197.56 (M + H).

## **$^1\text{H}$ and $^{13}\text{C}$ spectra of new compounds**

|                               |                      |                          |                                                               |                               |                      |
|-------------------------------|----------------------|--------------------------|---------------------------------------------------------------|-------------------------------|----------------------|
| <b>Acquisition Time (sec)</b> | 1.9923               | <b>Comment</b>           | Priyanka 1H                                                   | <b>Date</b>                   | 10 Dec 2009 16:38:32 |
| <b>Date Stamp</b>             | 10 Dec 2009 16:38:32 | <b>File Name</b>         | \\172.16.2.18\mr_data\AV400\DEC_09\Thu2av400#003\1\pdata\1\1r |                               |                      |
| <b>Frequency (MHz)</b>        | 400.13               | <b>Nucleus</b>           | 1H                                                            | <b>Number of Transients</b>   | 64                   |
| <b>Original Points Count</b>  | 16384                | <b>Owner</b>             | root                                                          | <b>Points Count</b>           | 32768                |
| <b>Receiver Gain</b>          | 287.00               | <b>SW(cyclical) (Hz)</b> | 8223.68                                                       | <b>Solvent</b>                | DMSO-d6              |
| <b>Spectrum Type</b>          | STANDARD             | <b>Sweep Width (Hz)</b>  | 8223.43                                                       | <b>Temperature (degree C)</b> | 20.600               |
|                               |                      |                          |                                                               | <b>Spectrum Offset (Hz)</b>   | 2465.3613            |

Thu2av400#003.001.001.1r.esp VerticalScaleFactor = 1

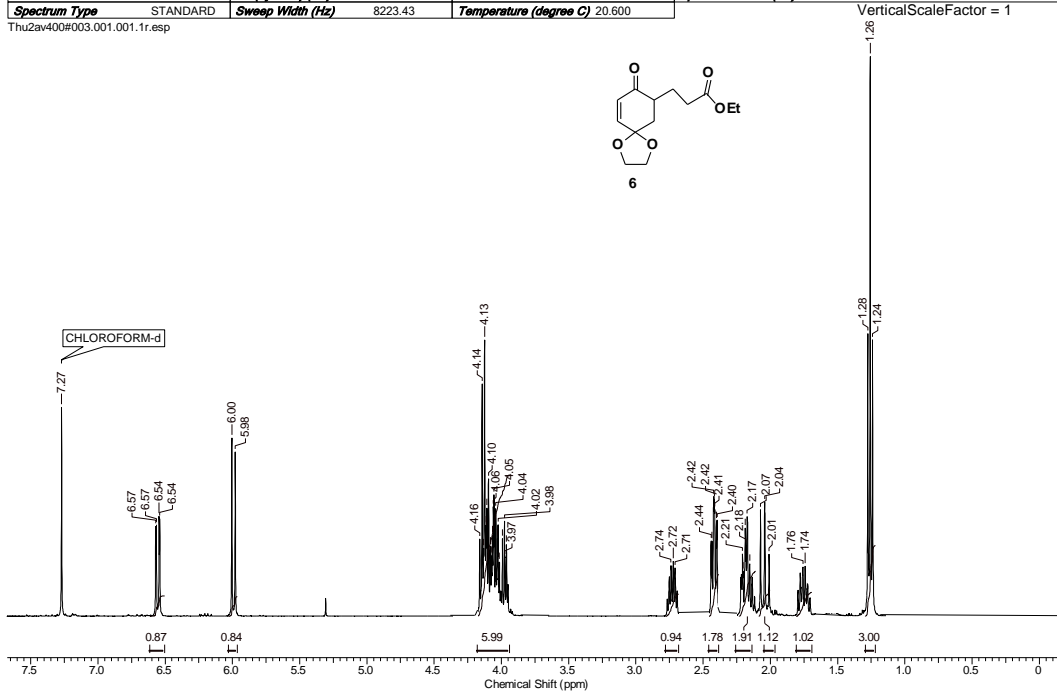

|                               |                      |                          |                                                             |                               |                      |
|-------------------------------|----------------------|--------------------------|-------------------------------------------------------------|-------------------------------|----------------------|
| <b>Acquisition Time (sec)</b> | 1.3664               | <b>Comment</b>           | Priyanka                                                    | <b>Date</b>                   | 08 Dec 2009 05:09:28 |
| <b>Date Stamp</b>             | 08 Dec 2009 05:09:28 | <b>File Name</b>         | E:\paper-1\DATA\substrate 1\Mon2av2#073 dec 09\1\pdata\1\1r |                               |                      |
| <b>Frequency (MHz)</b>        | 50.32                | <b>Nucleus</b>           | 13C                                                         | <b>Number of Transients</b>   | 1000                 |
| <b>Original Points Count</b>  | 16384                | <b>Owner</b>             | Administrator                                               | <b>Points Count</b>           | 32768                |
| <b>Receiver Gain</b>          | 512.00               | <b>SW(cyclical) (Hz)</b> | 11990.41                                                    | <b>Solvent</b>                | CHLOROFORM-d         |
| <b>Spectrum Offset (Hz)</b>   | 5029.5049            | <b>Spectrum Type</b>     | STANDARD                                                    | <b>Sweep Width (Hz)</b>       | 11990.04             |
|                               |                      |                          |                                                             | <b>Temperature (degree C)</b> | 27.000               |

Mon2av2#073 dec 09.001.001.1r.esp VerticalScaleFactor = 1

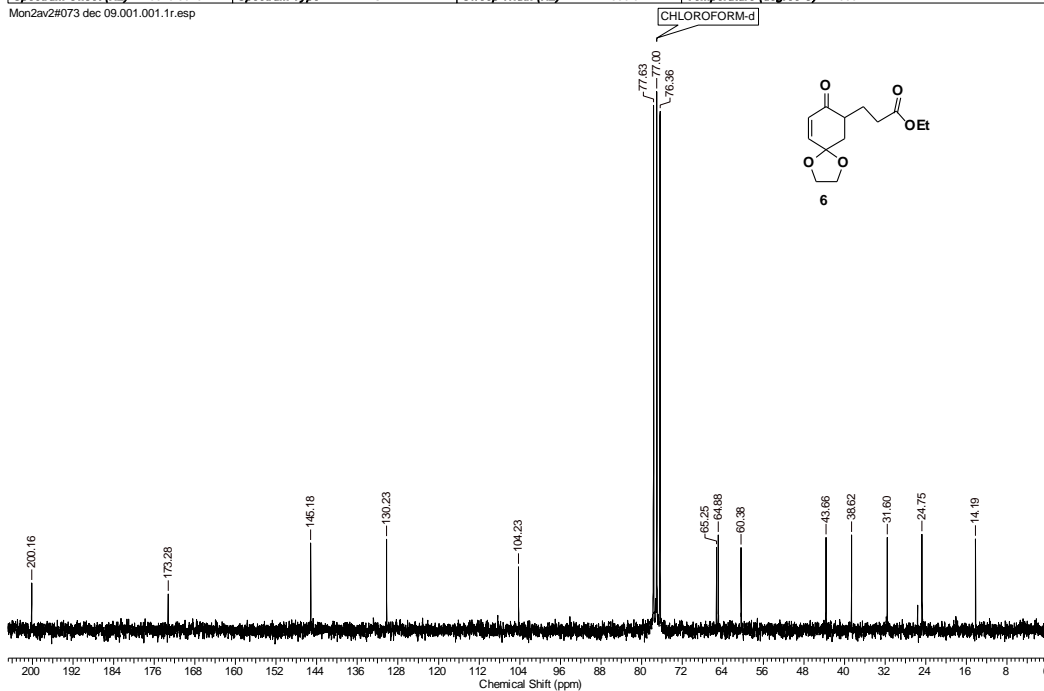

|                               |                      |                          |                                                            |                               |                      |
|-------------------------------|----------------------|--------------------------|------------------------------------------------------------|-------------------------------|----------------------|
| <b>Acquisition Time (sec)</b> | 1.3664               | <b>Comment</b>           | Priyanka                                                   | <b>Date</b>                   | 08 Dec 2009 05:32:56 |
| <b>Date Stamp</b>             | 08 Dec 2009 05:32:56 | <b>File Name</b>         | E:\paper-1\DATA\substrate 1\Mon2av2#073 dec 09\2\pdata\11r |                               |                      |
| <b>Frequency (MHz)</b>        | 50.32                | <b>Nucleus</b>           | 13C                                                        | <b>Number of Transients</b>   | 400                  |
| <b>Original Points Count</b>  | 16384                | <b>Owner</b>             | Administrator                                              | <b>Points Count</b>           | 32768                |
| <b>Receiver Gain</b>          | 16384.00             | <b>SW(cyclical) (Hz)</b> | 11990.41                                                   | <b>Solvent</b>                | CHLOROFORM-d         |
| <b>Spectrum Offset (Hz)</b>   | 5031.7993            | <b>Spectrum Type</b>     | DEPT135                                                    | <b>Sweep Width (Hz)</b>       | 11990.04             |
|                               |                      |                          |                                                            | <b>Temperature (degree C)</b> | 27.000               |

Mon2av2#073 dec 09.002.001.1r.esp

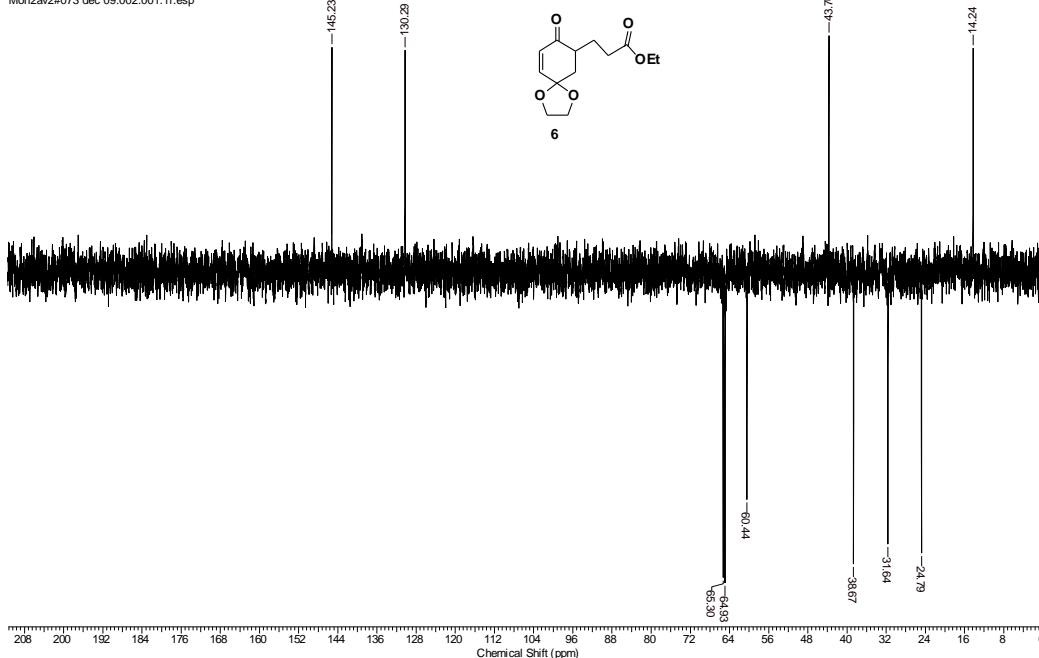

|                               |                      |                          |                                                                 |                               |                      |
|-------------------------------|----------------------|--------------------------|-----------------------------------------------------------------|-------------------------------|----------------------|
| <b>Acquisition Time (sec)</b> | 1.6384               | <b>Comment</b>           | 1H Jagdish                                                      | <b>Date</b>                   | 30 Jan 2012 11:27:12 |
| <b>Date Stamp</b>             | 30 Jan 2012 11:27:12 | <b>File Name</b>         | E:\paper-1\DATA\allyl pentenone\Mon5av500#009 jan12\1\pdata\11r |                               |                      |
| <b>Frequency (MHz)</b>        | 500.13               | <b>Nucleus</b>           | 1H                                                              | <b>Number of Transients</b>   | 64                   |
| <b>Original Points Count</b>  | 16384                | <b>Owner</b>             | nmr                                                             | <b>Points Count</b>           | 32768                |
| <b>Receiver Gain</b>          | 128.00               | <b>SW(cyclical) (Hz)</b> | 10000.00                                                        | <b>Solvent</b>                | CHLOROFORM-d         |
| <b>Spectrum Offset (Hz)</b>   | 3492.9702            | <b>Spectrum Type</b>     | STANDARD                                                        | <b>Sweep Width (Hz)</b>       | 9999.70              |
|                               |                      |                          |                                                                 | <b>Temperature (degree C)</b> | 22.100               |

Mon5av500#009 jan12.001.001.1r.esp

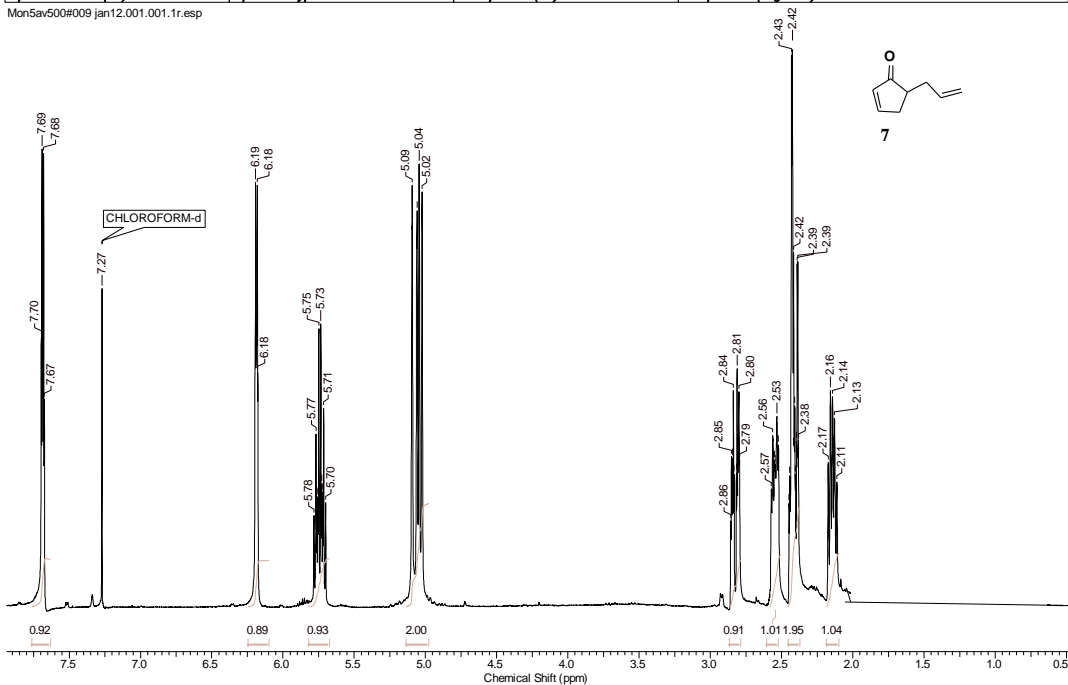

|                               |                      |                          |                                                                 |                               |                      |
|-------------------------------|----------------------|--------------------------|-----------------------------------------------------------------|-------------------------------|----------------------|
| <b>Acquisition Time (sec)</b> | 1.1010               | <b>Comment</b>           | 13C                                                             | <b>Date</b>                   | 30 Jan 2012 13:18:08 |
| <b>Date Stamp</b>             | 30 Jan 2012 13:18:08 | <b>File Name</b>         | E:\paper-1\DATA\allyl pentenone\MonSav500#009 jan12\3\data1\11r |                               |                      |
| <b>Frequency (MHz)</b>        | 125.76               | <b>Nucleus</b>           | 13C                                                             | <b>Number of Transients</b>   | 920                  |
| <b>Original Points Count</b>  | 32768                | <b>Owner</b>             | nmr                                                             | <b>Points Count</b>           | 32768                |
| <b>Receiver Gain</b>          | 2050.00              | <b>SW(cyclical) (Hz)</b> | 29761.90                                                        | <b>Solvent</b>                | CHLOROFORM-d         |
| <b>Spectrum Offset (Hz)</b>   | 12569.3496           | <b>Spectrum Type</b>     | STANDARD                                                        | <b>Sweep Width (Hz)</b>       | 29761.00             |
|                               |                      |                          |                                                                 | <b>Temperature (degree C)</b> | 23.100               |
|                               |                      |                          |                                                                 | VerticalScaleFactor = 1       |                      |

MonSav500#009 jan12.003.001.1r.esp

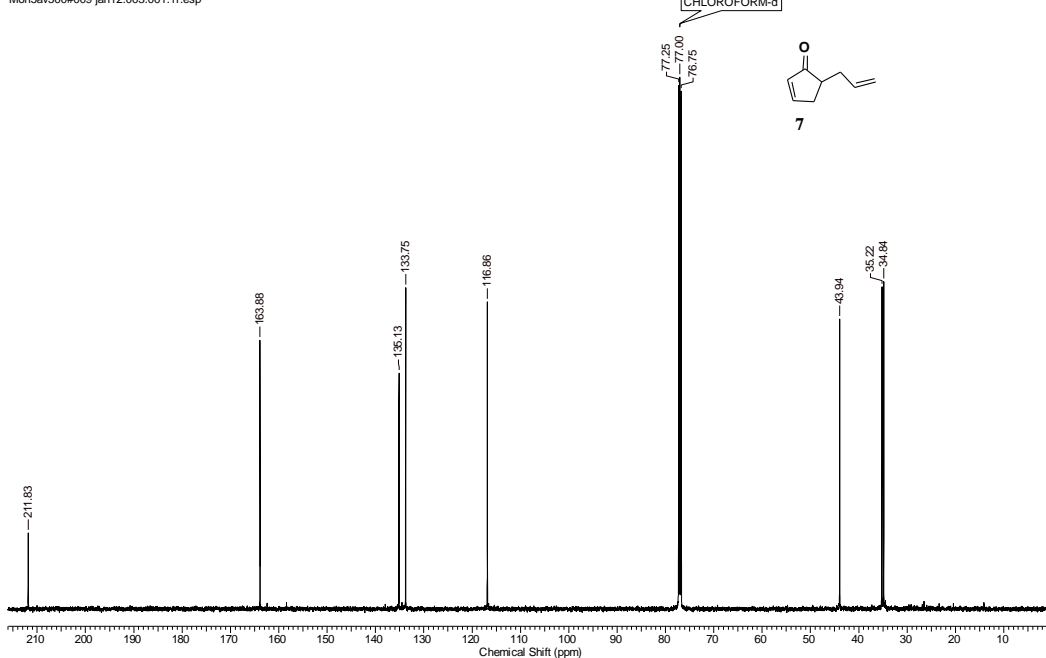

|                               |                      |                          |                                                                 |                               |                      |
|-------------------------------|----------------------|--------------------------|-----------------------------------------------------------------|-------------------------------|----------------------|
| <b>Acquisition Time (sec)</b> | 1.1010               | <b>Comment</b>           | DEPT135                                                         | <b>Date</b>                   | 30 Jan 2012 12:33:20 |
| <b>Date Stamp</b>             | 30 Jan 2012 12:33:20 | <b>File Name</b>         | E:\paper-1\DATA\allyl pentenone\MonSav500#009 jan12\2\data1\11r |                               |                      |
| <b>Frequency (MHz)</b>        | 125.76               | <b>Nucleus</b>           | 13C                                                             | <b>Number of Transients</b>   | 1200                 |
| <b>Original Points Count</b>  | 32768                | <b>Owner</b>             | nmr                                                             | <b>Points Count</b>           | 32768                |
| <b>Receiver Gain</b>          | 2050.00              | <b>SW(cyclical) (Hz)</b> | 29761.90                                                        | <b>Solvent</b>                | CHLOROFORM-d         |
| <b>Spectrum Offset (Hz)</b>   | 12575.7842           | <b>Spectrum Type</b>     | DEPT135                                                         | <b>Sweep Width (Hz)</b>       | 29761.00             |
|                               |                      |                          |                                                                 | <b>Temperature (degree C)</b> | 22.300               |
|                               |                      |                          |                                                                 | VerticalScaleFactor = 1       |                      |

MonSav500#009 jan12.002.001.1r.esp

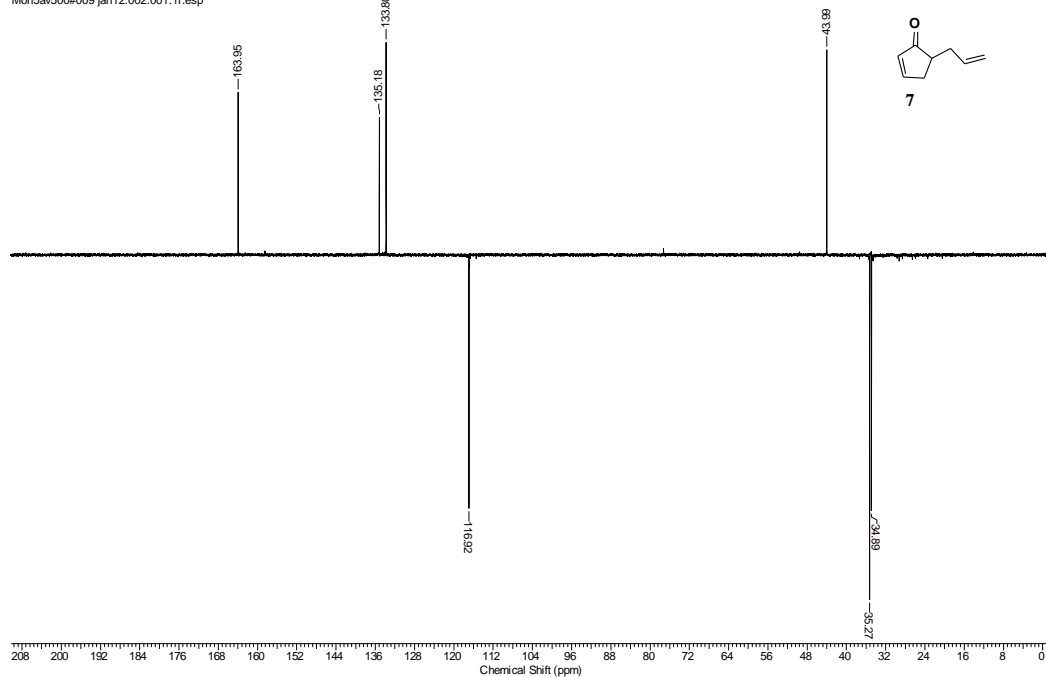

|                               |                      |                          |             |                               |                                                               |
|-------------------------------|----------------------|--------------------------|-------------|-------------------------------|---------------------------------------------------------------|
| <b>Acquisition Time (sec)</b> | 1.6384               | <b>Comment</b>           | 1H priyanka | <b>Date</b>                   | 21 Jan 2012 15:06:56                                          |
| <b>Date Stamp</b>             | 21 Jan 2012 15:06:56 |                          |             | <b>File Name</b>              | E:\paper-1\DATA\allyl hexenone\Sat3av500#004 jan12\1\data\11r |
| <b>Frequency (MHz)</b>        | 500.13               | <b>Nucleus</b>           | 1H          | <b>Number of Transients</b>   | 64                                                            |
| <b>Original Points Count</b>  | 16384                | <b>Owner</b>             | nmr         | <b>Points Count</b>           | 32768                                                         |
| <b>Receiver Gain</b>          | 90.50                | <b>SW(cyclical) (Hz)</b> | 10000.00    | <b>Solvent</b>                | CHLOROFORM-d                                                  |
| <b>Spectrum Offset (Hz)</b>   | 3492.3599            | <b>Spectrum Type</b>     | STANDARD    | <b>Sweep Width (Hz)</b>       | 9999.70                                                       |
|                               |                      |                          |             | <b>Temperature (degree C)</b> | 21.000                                                        |

Sat3av500#004 jan12.001.001.1r.esp

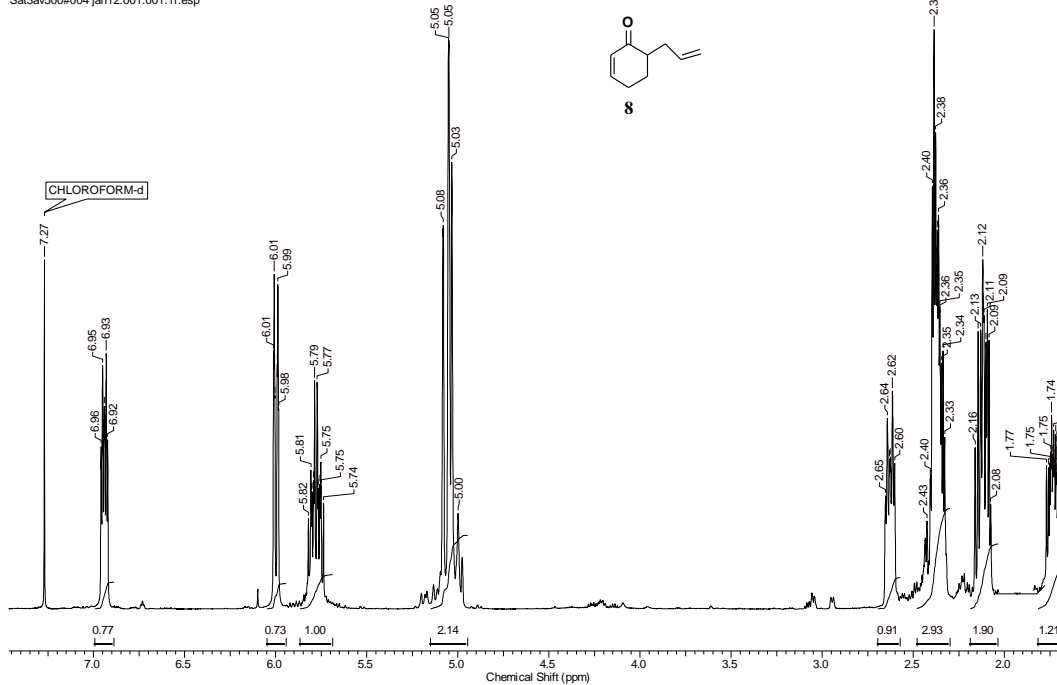

|                               |                      |                          |          |                               |                                                               |
|-------------------------------|----------------------|--------------------------|----------|-------------------------------|---------------------------------------------------------------|
| <b>Acquisition Time (sec)</b> | 1.1010               | <b>Comment</b>           | 13C      | <b>Date</b>                   | 21 Jan 2012 16:32:16                                          |
| <b>Date Stamp</b>             | 21 Jan 2012 16:32:16 |                          |          | <b>File Name</b>              | E:\paper-1\DATA\allyl hexenone\Sat3av500#004 jan12\3\data\11r |
| <b>Frequency (MHz)</b>        | 125.76               | <b>Nucleus</b>           | 13C      | <b>Number of Transients</b>   | 1206                                                          |
| <b>Original Points Count</b>  | 32768                | <b>Owner</b>             | nmr      | <b>Points Count</b>           | 32768                                                         |
| <b>Receiver Gain</b>          | 2050.00              | <b>SW(cyclical) (Hz)</b> | 29761.90 | <b>Solvent</b>                | CHLOROFORM-d                                                  |
| <b>Spectrum Offset (Hz)</b>   | 12570.2578           | <b>Spectrum Type</b>     | STANDARD | <b>Sweep Width (Hz)</b>       | 29761.00                                                      |
|                               |                      |                          |          | <b>Temperature (degree C)</b> | 22.800                                                        |

Sat3av500#004 jan12.003.001.1r.esp

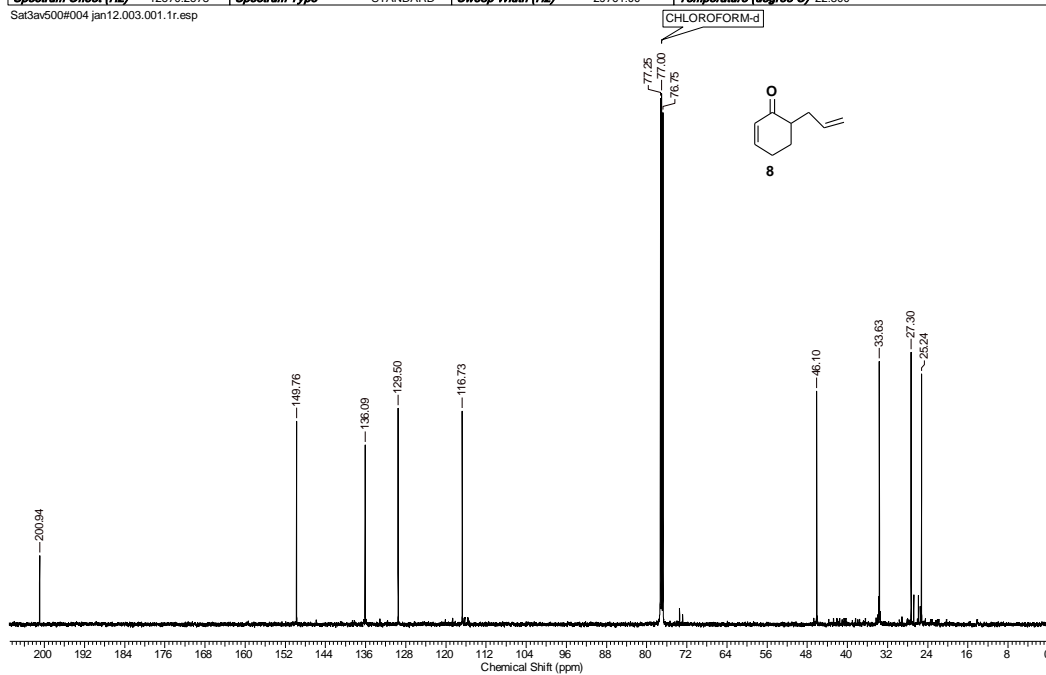



|                        |                      |                   |                                                               |                        |                      |
|------------------------|----------------------|-------------------|---------------------------------------------------------------|------------------------|----------------------|
| Acquisition Time (sec) | 1.1010               | Comment           | DEPT135                                                       | Date                   | 21 Jan 2012 15:30:24 |
| Date Stamp             | 21 Jan 2012 15:30:24 | File Name         | E:\paper-1\DATA\allyl hexenone\Sat3av500#004 jan12\2pdata\11r |                        |                      |
| Frequency (MHz)        | 125.76               | Nucleus           | 13C                                                           | Number of Transients   | 427                  |
| Original Points Count  | 32768                | Owner             | nmr                                                           | Points Count           | 32768                |
| Receiver Gain          | 2050.00              | SW(cyclical) (Hz) | 29761.90                                                      | Solvent                | CHLOROFORM-d         |
| Spectrum Offset (Hz)   | 12575.7842           | Spectrum Type     | DEPT135                                                       | Sweep Width (Hz)       | 29761.00             |
|                        |                      |                   |                                                               | Temperature (degree C) | 21.600               |

Sat3av500#004 jan12.002.001.1r.esp VerticalScaleFactor = 1

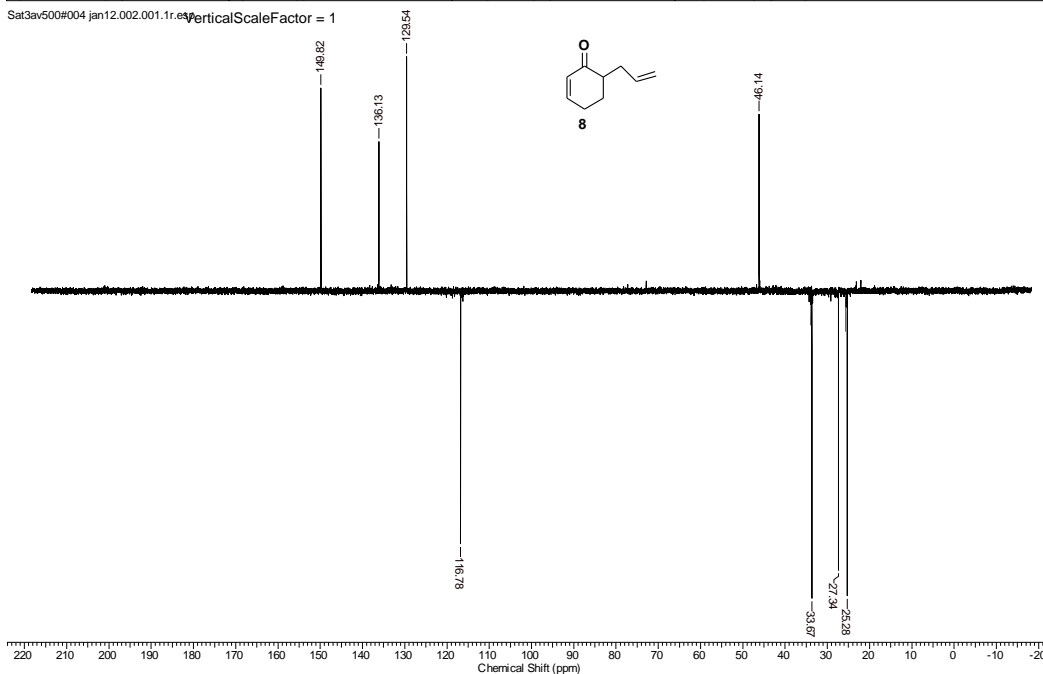

|                        |                      |                   |                                                                 |                        |                      |
|------------------------|----------------------|-------------------|-----------------------------------------------------------------|------------------------|----------------------|
| Acquisition Time (sec) | 1.9923               | Comment           | Priyanka 1H                                                     | Date                   | 10 Jun 2012 09:36:08 |
| Date Stamp             | 10 Jun 2012 09:36:08 | File Name         | E:\paper-1\DATA\allyl heptenone\Sun3av400#002 jun 12\1pdata\11r |                        |                      |
| Frequency (MHz)        | 400.13               | Nucleus           | 1H                                                              | Number of Transients   | 12                   |
| Original Points Count  | 16384                | Owner             | Administrator                                                   | Points Count           | 32768                |
| Receiver Gain          | 322.00               | SW(cyclical) (Hz) | 8223.68                                                         | Solvent                | CHLOROFORM-d         |
| Spectrum Offset (Hz)   | 2465.1101            | Spectrum Type     | STANDARD                                                        | Sweep Width (Hz)       | 8223.43              |
|                        |                      |                   |                                                                 | Temperature (degree C) | 24.400               |

Sun3av400#002 jun 12.001.001.1r.esp

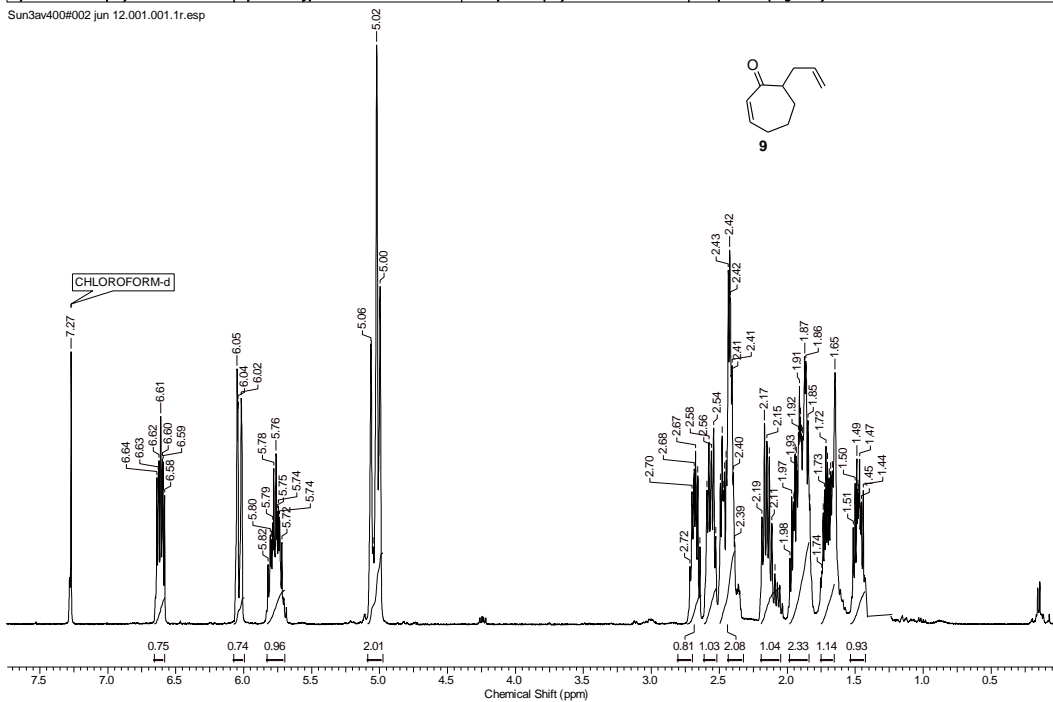

|                               |                      |                          |                                                                   |                               |                      |
|-------------------------------|----------------------|--------------------------|-------------------------------------------------------------------|-------------------------------|----------------------|
| <b>Acquisition Time (sec)</b> | 0.6488               | <b>Comment</b>           | 13C                                                               | <b>Date</b>                   | 10 Jun 2012 09:44:40 |
| <b>Date Stamp</b>             | 10 Jun 2012 09:44:40 | <b>File Name</b>         | E:\paper-1\DATA\allyl heptenone\Sun3av400#002 jun 12\3\pdata1\11r |                               |                      |
| <b>Frequency (MHz)</b>        | 100.61               | <b>Nucleus</b>           | 13C                                                               | <b>Number of Transients</b>   | 569                  |
| <b>Original Points Count</b>  | 16384                | <b>Owner</b>             | root                                                              | <b>Points Count</b>           | 32768                |
| <b>Receiver Gain</b>          | 2050.00              | <b>SW(cyclical) (Hz)</b> | 25252.53                                                          | <b>Solvent</b>                | CHLOROFORM-d         |
| <b>Spectrum Offset (Hz)</b>   | 9555.5049            | <b>Spectrum Type</b>     | STANDARD                                                          | <b>Sweep Width (Hz)</b>       | 25251.75             |
|                               |                      |                          |                                                                   | <b>Temperature (degree C)</b> | 24.600               |

Sun3av400#002 jun 12.003.001.1r.esp

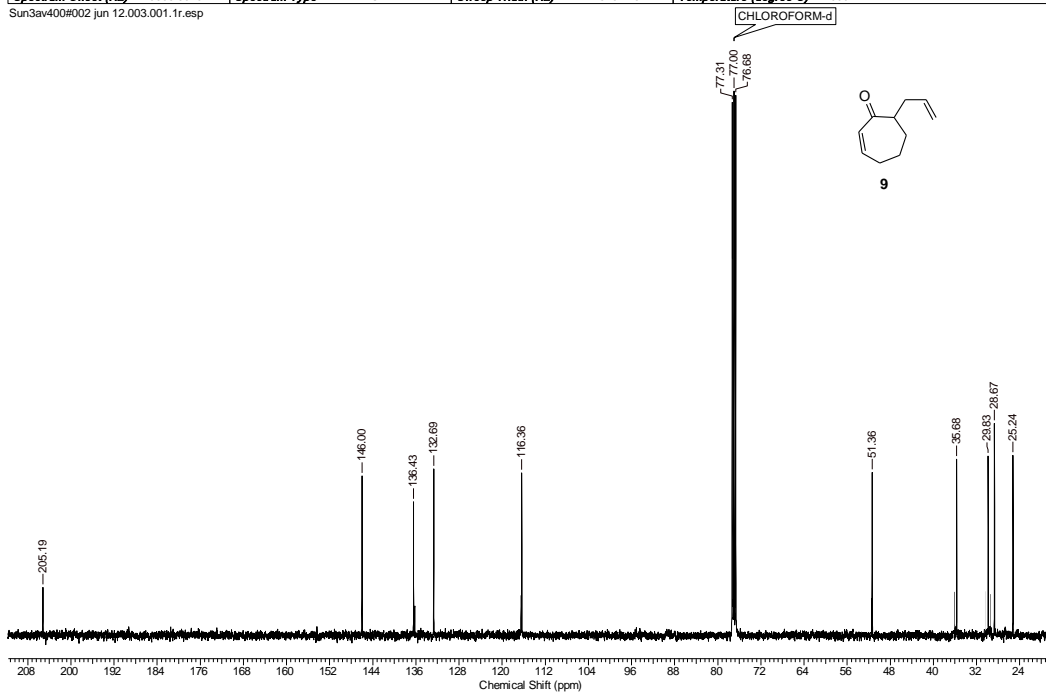

|                               |                      |                          |                                                                   |                               |                      |
|-------------------------------|----------------------|--------------------------|-------------------------------------------------------------------|-------------------------------|----------------------|
| <b>Acquisition Time (sec)</b> | 0.6488               | <b>Comment</b>           | DEPT                                                              | <b>Date</b>                   | 10 Jun 2012 09:38:16 |
| <b>Date Stamp</b>             | 10 Jun 2012 09:38:16 | <b>File Name</b>         | E:\paper-1\DATA\allyl heptenone\Sun3av400#002 jun 12\2\pdata1\11r |                               |                      |
| <b>Frequency (MHz)</b>        | 100.61               | <b>Nucleus</b>           | 13C                                                               | <b>Number of Transients</b>   | 152                  |
| <b>Original Points Count</b>  | 16384                | <b>Owner</b>             | root                                                              | <b>Points Count</b>           | 32768                |
| <b>Receiver Gain</b>          | 16384.00             | <b>SW(cyclical) (Hz)</b> | 25252.53                                                          | <b>Solvent</b>                | CHLOROFORM-d         |
| <b>Spectrum Offset (Hz)</b>   | 10060.3281           | <b>Spectrum Type</b>     | DEPT135                                                           | <b>Sweep Width (Hz)</b>       | 25251.75             |
|                               |                      |                          |                                                                   | <b>Temperature (degree C)</b> | 24.400               |

Sun3av400#002 jun 12.002.001.1r.esp

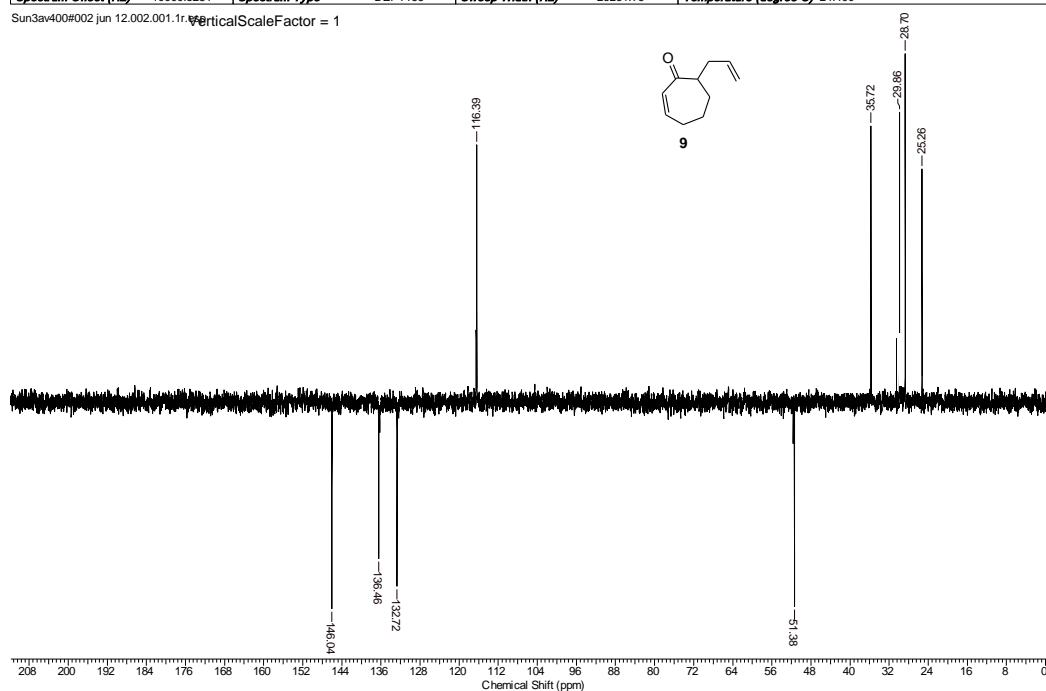

|                                    |                      |                          |                                                           |                               |                      |
|------------------------------------|----------------------|--------------------------|-----------------------------------------------------------|-------------------------------|----------------------|
| <b>Acquisition Time (sec)</b>      | 1.9923               | <b>Comment</b>           | Priyanka 1H/ CDC13                                        | <b>Date</b>                   | 27 Sep 2011 15:13:12 |
| <b>Date Stamp</b>                  | 27 Sep 2011 15:13:12 | <b>File Name</b>         | E:\paper-1\DATA\tbs_enone\Tue5av400#008sep_11\1\data\111r | <b>Origin</b>                 | spect                |
| <b>Frequency (MHz)</b>             | 400.13               | <b>Nucleus</b>           | 1H                                                        | <b>Number of Transients</b>   | 30                   |
| <b>Original Points Count</b>       | 16384                | <b>Owner</b>             | Administrator                                             | <b>Points Count</b>           | 32768                |
| <b>Receiver Gain</b>               | 144.00               | <b>SW(cyclical) (Hz)</b> | 8223.68                                                   | <b>Solvent</b>                | CHLOROFORM-d         |
| <b>Spectrum Offset (Hz)</b>        | 2465.0994            | <b>Spectrum Type</b>     | STANDARD                                                  | <b>Sweep Width (Hz)</b>       | 8223.43              |
|                                    |                      |                          |                                                           | <b>Temperature (degree C)</b> | 22.800               |
| Tue5av400#008sep_11.001.001.1r.esp |                      |                          |                                                           |                               |                      |

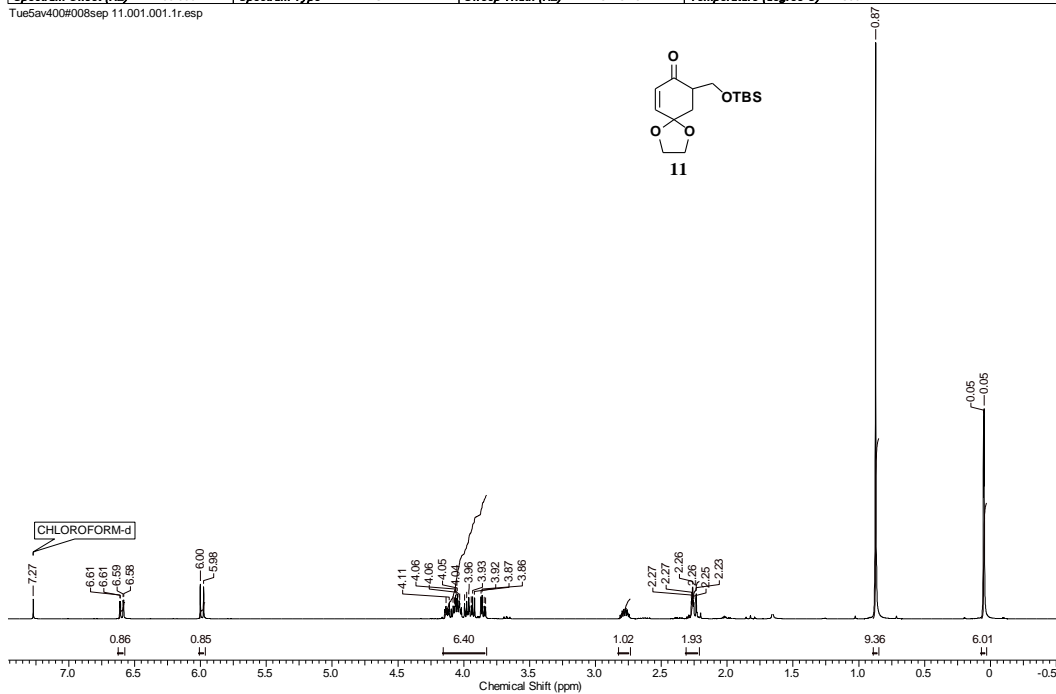

|                                  |                      |                          |                                                         |                               |                      |
|----------------------------------|----------------------|--------------------------|---------------------------------------------------------|-------------------------------|----------------------|
| <b>Acquisition Time (sec)</b>    | 0.6832               | <b>Comment</b>           | Priyanka/10716                                          | <b>Date</b>                   | 22 Mar 2012 03:31:20 |
| <b>Date Stamp</b>                | 22 Mar 2012 03:31:20 | <b>File Name</b>         | E:\paper-1\DATA\tbs_enone\Wed4av2#039_mar12\2\data\111r | <b>Origin</b>                 | av200                |
| <b>Frequency (MHz)</b>           | 50.32                | <b>Nucleus</b>           | 13C                                                     | <b>Number of Transients</b>   | 2400                 |
| <b>Original Points Count</b>     | 8192                 | <b>Owner</b>             | Administrator                                           | <b>Points Count</b>           | 32768                |
| <b>Receiver Gain</b>             | 2298.80              | <b>SW(cyclical) (Hz)</b> | 11990.41                                                | <b>Solvent</b>                | CHLOROFORM-d         |
| <b>Spectrum Offset (Hz)</b>      | 5029.1387            | <b>Spectrum Type</b>     | STANDARD                                                | <b>Sweep Width (Hz)</b>       | 11990.04             |
|                                  |                      |                          |                                                         | <b>Temperature (degree C)</b> | 27.000               |
| Wed4av2#039_mar12.002.001.1r.esp |                      |                          |                                                         |                               |                      |

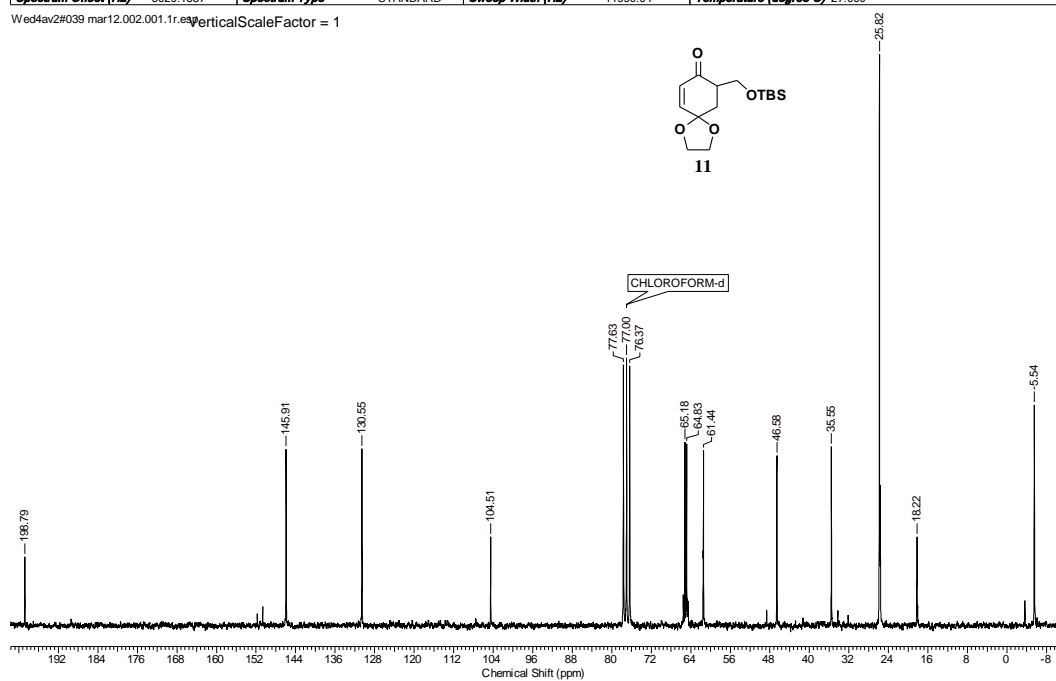

|                               |                      |                          |                                                         |                               |                      |
|-------------------------------|----------------------|--------------------------|---------------------------------------------------------|-------------------------------|----------------------|
| <b>Acquisition Time (sec)</b> | 0.6832               | <b>Comment</b>           | Priyanka/10716                                          | <b>Date</b>                   | 22 Mar 2012 01:40:24 |
| <b>Date Stamp</b>             | 22 Mar 2012 01:40:24 | <b>File Name</b>         | E:\paper-1\DATA\tlbs enone\Wed4av2#039 mar12\1\data\11r | <b>Origin</b>                 | av200                |
| <b>Frequency (MHz)</b>        | 50.32                | <b>Nucleus</b>           | 13C                                                     | <b>Number of Transients</b>   | 1800                 |
| <b>Original Points Count</b>  | 8192                 | <b>Owner</b>             | Administrator                                           | <b>Points Count</b>           | 32768                |
| <b>Receiver Gain</b>          | 16384.00             | <b>SW(cyclical) (Hz)</b> | 11990.41                                                | <b>Solvent</b>                | CHLOROFORM-d         |
| <b>Spectrum Offset (Hz)</b>   | 5031.7993            | <b>Spectrum Type</b>     | DEPT135                                                 | <b>Sweep Width (Hz)</b>       | 11990.04             |
|                               |                      |                          |                                                         | <b>Temperature (degree C)</b> | 27.000               |

Wed4av2#039 mar12.001.001.1r.esp

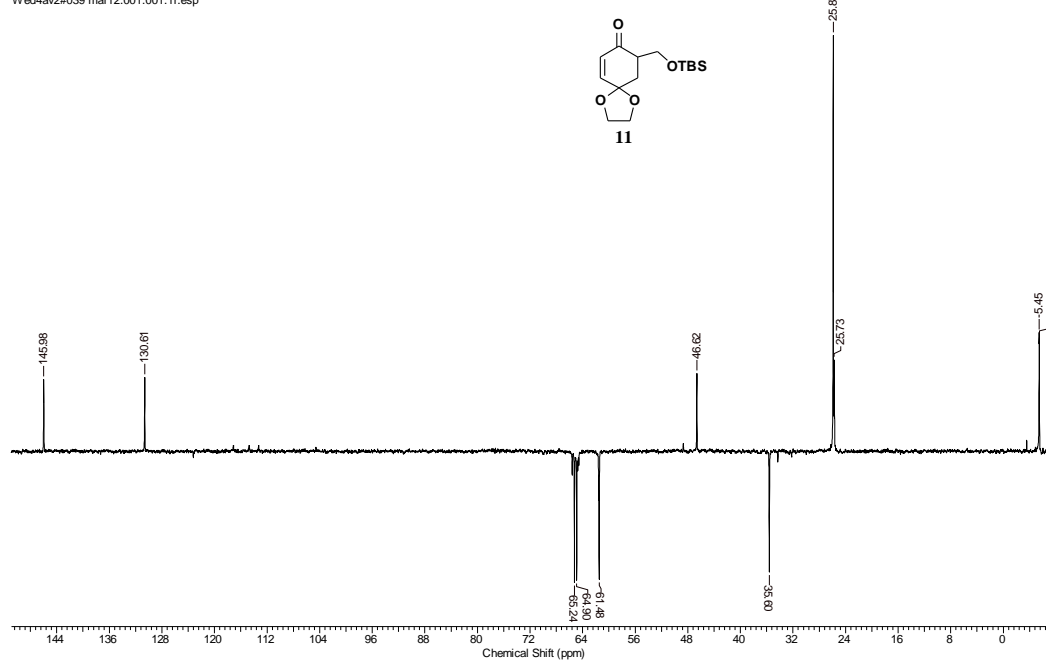

|                               |                      |                          |                                                                       |                               |                      |
|-------------------------------|----------------------|--------------------------|-----------------------------------------------------------------------|-------------------------------|----------------------|
| <b>Acquisition Time (sec)</b> | 1.6384               | <b>Comment</b>           | 1H priyanka                                                           | <b>Date</b>                   | 21 Jan 2012 16:42:56 |
| <b>Date Stamp</b>             | 21 Jan 2012 16:42:56 | <b>File Name</b>         | E:\paper-1\DATA\acrylate without ring\Sat3av500#005 jan 12\1\data\11r | <b>Origin</b>                 | spect                |
| <b>Frequency (MHz)</b>        | 500.13               | <b>Nucleus</b>           | 1H                                                                    | <b>Number of Transients</b>   | 64                   |
| <b>Original Points Count</b>  | 16384                | <b>Owner</b>             | nmr                                                                   | <b>Points Count</b>           | 32768                |
| <b>Receiver Gain</b>          | 90.50                | <b>SW(cyclical) (Hz)</b> | 10000.00                                                              | <b>Solvent</b>                | CHLOROFORM-d         |
| <b>Spectrum Offset (Hz)</b>   | 3492.3599            | <b>Spectrum Type</b>     | STANDARD                                                              | <b>Sweep Width (Hz)</b>       | 9999.70              |
|                               |                      |                          |                                                                       | <b>Temperature (degree C)</b> | 21.700               |

Sat3av500#005 jan 12.001.001.1r.esp

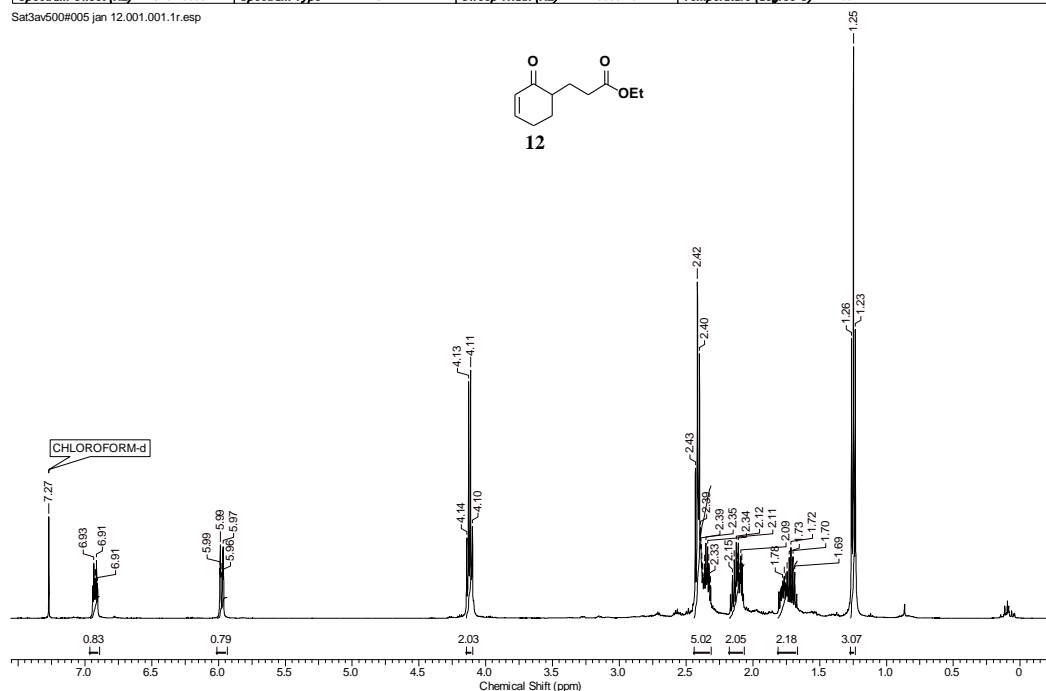

|                               |                      |                          |                                                                         |                               |                      |
|-------------------------------|----------------------|--------------------------|-------------------------------------------------------------------------|-------------------------------|----------------------|
| <b>Acquisition Time (sec)</b> | 1.1010               | <b>Comment</b>           | 13C                                                                     | <b>Date</b>                   | 21 Jan 2012 17:12:48 |
| <b>Date Stamp</b>             | 21 Jan 2012 17:12:48 | <b>File Name</b>         | E:\paper-1\DATA\acrylate without ring\Sat3av500#005 jan 12\3\pdata\111r |                               |                      |
| <b>Frequency (MHz)</b>        | 125.76               | <b>Nucleus</b>           | 13C                                                                     | <b>Number of Transients</b>   | 805                  |
| <b>Original Points Count</b>  | 32768                | <b>Owner</b>             | nmr                                                                     | <b>Points Count</b>           | 32768                |
| <b>Receiver Gain</b>          | 2050.00              | <b>SW(cyclical) (Hz)</b> | 29761.90                                                                | <b>Solvent</b>                | CHLOROFORM-d         |
| <b>Spectrum Offset (Hz)</b>   | 12570.2578           | <b>Spectrum Type</b>     | STANDARD                                                                | <b>Sweep Width (Hz)</b>       | 29761.00             |
|                               |                      |                          |                                                                         | <b>Temperature (degree C)</b> | 22.600               |

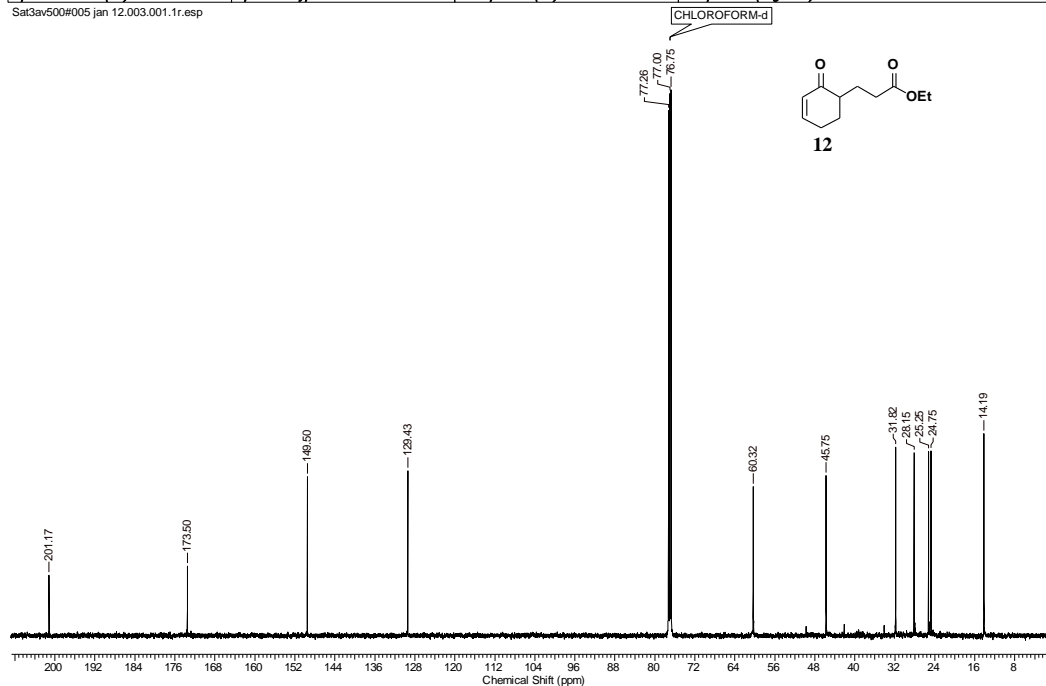

|                               |                      |                          |                                                                         |                               |                      |
|-------------------------------|----------------------|--------------------------|-------------------------------------------------------------------------|-------------------------------|----------------------|
| <b>Acquisition Time (sec)</b> | 1.1010               | <b>Comment</b>           | DEPT135                                                                 | <b>Date</b>                   | 21 Jan 2012 17:10:40 |
| <b>Date Stamp</b>             | 21 Jan 2012 17:10:40 | <b>File Name</b>         | E:\paper-1\DATA\acrylate without ring\Sat3av500#005 jan 12\2\pdata\111r |                               |                      |
| <b>Frequency (MHz)</b>        | 125.76               | <b>Nucleus</b>           | 13C                                                                     | <b>Number of Transients</b>   | 547                  |
| <b>Original Points Count</b>  | 32768                | <b>Owner</b>             | nmr                                                                     | <b>Points Count</b>           | 32768                |
| <b>Receiver Gain</b>          | 2050.00              | <b>SW(cyclical) (Hz)</b> | 29761.90                                                                | <b>Solvent</b>                | CHLOROFORM-d         |
| <b>Spectrum Offset (Hz)</b>   | 12575.7842           | <b>Spectrum Type</b>     | DEPT135                                                                 | <b>Sweep Width (Hz)</b>       | 29761.00             |
|                               |                      |                          |                                                                         | <b>Temperature (degree C)</b> | 22.000               |

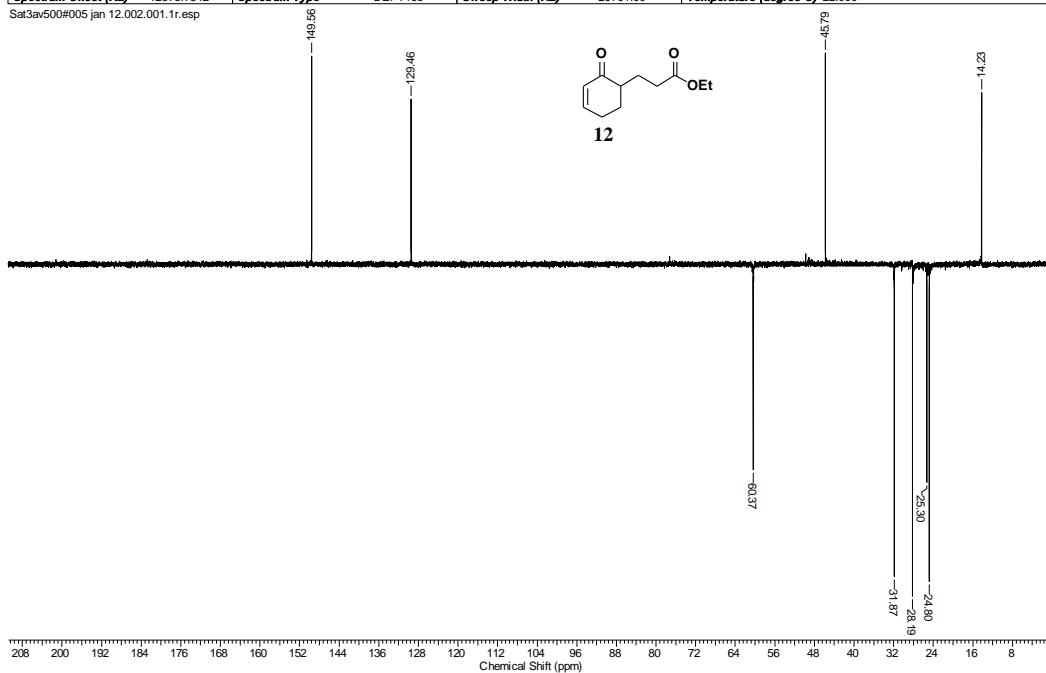

|                               |                      |                          |                                            |                               |                      |
|-------------------------------|----------------------|--------------------------|--------------------------------------------|-------------------------------|----------------------|
| <b>Acquisition Time (sec)</b> | 1.6384               | <b>Comment</b>           | 1H Priyanka                                | <b>Date</b>                   | 10 Sep 2011 11:04:00 |
| <b>Date Stamp</b>             | 10 Sep 2011 11:04:00 | <b>File Name</b>         | D:\paper-1\DATA\1\Sat2av500#001\1\data1\1r |                               |                      |
| <b>Frequency (MHz)</b>        | 500.13               | <b>Nucleus</b>           | 1H                                         | <b>Number of Transients</b>   | 64                   |
| <b>Original Points Count</b>  | 16384                | <b>Owner</b>             | nmr                                        | <b>Points Count</b>           | 32768                |
| <b>Receiver Gain</b>          | 90.50                | <b>SW(cyclical) (Hz)</b> | 10000.00                                   | <b>Solvent</b>                | CHLOROFORM-d         |
| <b>Spectrum Offset (Hz)</b>   | 3492.0547            | <b>Spectrum Type</b>     | STANDARD                                   | <b>Sweep Width (Hz)</b>       | 9999.70              |
|                               |                      |                          |                                            | <b>Temperature (degree C)</b> | 24.800               |

Sat2av500#001.001.001.1r.esp

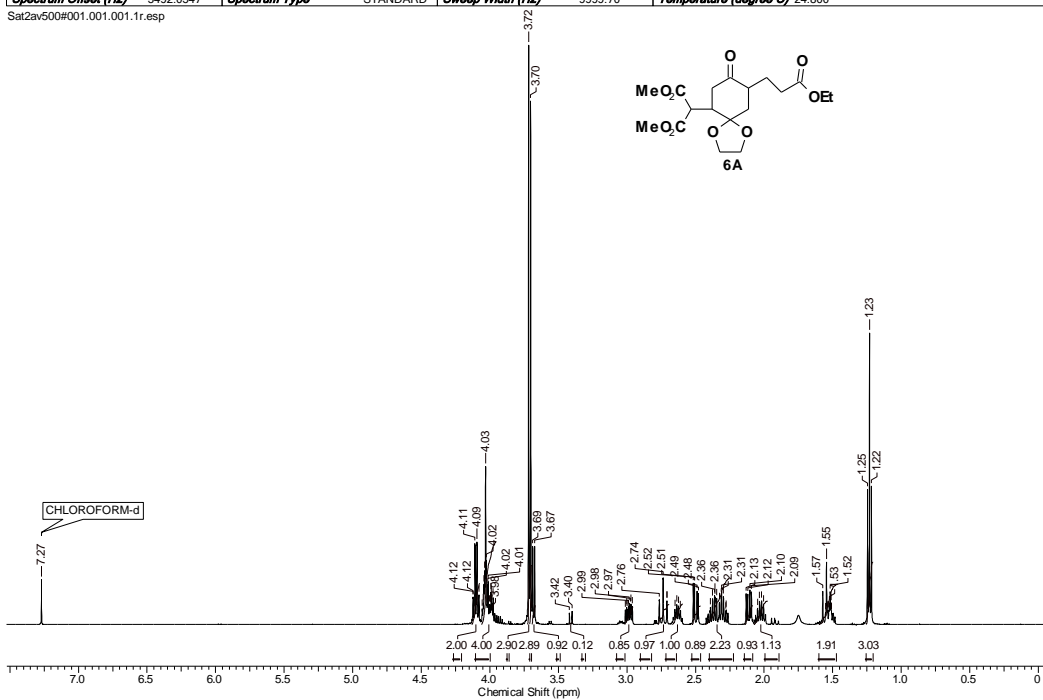

|                               |                      |                          |                                            |                               |                      |
|-------------------------------|----------------------|--------------------------|--------------------------------------------|-------------------------------|----------------------|
| <b>Acquisition Time (sec)</b> | 1.1010               | <b>Comment</b>           | 13C                                        | <b>Date</b>                   | 10 Sep 2011 12:12:16 |
| <b>Date Stamp</b>             | 10 Sep 2011 12:12:16 | <b>File Name</b>         | D:\paper-1\DATA\1\Sat2av500#001\3\data1\1r |                               |                      |
| <b>Frequency (MHz)</b>        | 125.76               | <b>Nucleus</b>           | 13C                                        | <b>Number of Transients</b>   | 739                  |
| <b>Original Points Count</b>  | 32768                | <b>Owner</b>             | nmr                                        | <b>Points Count</b>           | 32768                |
| <b>Receiver Gain</b>          | 2050.00              | <b>SW(cyclical) (Hz)</b> | 29761.90                                   | <b>Solvent</b>                | CHLOROFORM-d         |
| <b>Spectrum Offset (Hz)</b>   | 12570.2578           | <b>Spectrum Type</b>     | STANDARD                                   | <b>Sweep Width (Hz)</b>       | 29761.00             |
|                               |                      |                          |                                            | <b>Temperature (degree C)</b> | 26.100               |

Sat2av500#001.003.001.1r.esp

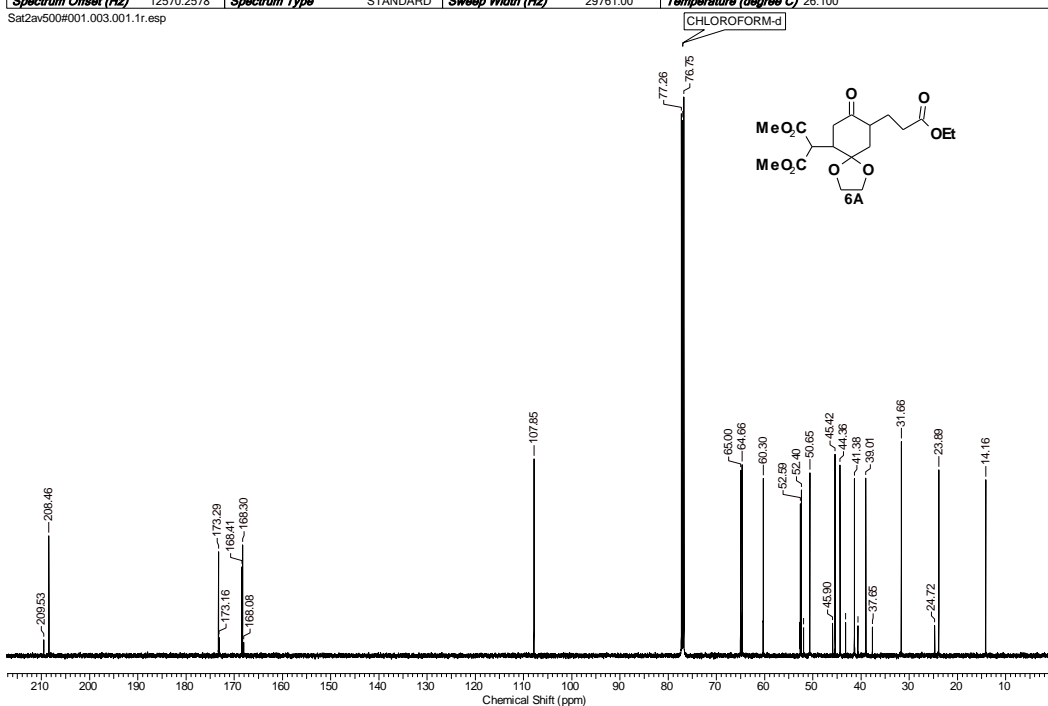

|                               |                      |                          |                                              |                             |                               |        |
|-------------------------------|----------------------|--------------------------|----------------------------------------------|-----------------------------|-------------------------------|--------|
| <b>Acquisition Time (sec)</b> | 1.1010               | <b>Comment</b>           | DEPT135                                      | <b>Date</b>                 | 10 Sep 2011 11:33:52          |        |
| <b>Date Stamp</b>             | 10 Sep 2011 11:33:52 | <b>File Name</b>         | E:\paper-1\DATA\1\Sat2av500#001\2\pdata\1\1r |                             |                               |        |
| <b>Frequency (MHz)</b>        | 125.76               | <b>Nucleus</b>           | 13C                                          | <b>Number of Transients</b> | 531                           |        |
| <b>Original Points Count</b>  | 32768                | <b>Owner</b>             | nmr                                          | <b>Points Count</b>         | 32768                         |        |
| <b>Receiver Gain</b>          | 2050.00              | <b>SW(cyclical) (Hz)</b> | 29761.90                                     | <b>Solvent</b>              | CHLOROFORM-d                  |        |
| <b>Spectrum Offset (Hz)</b>   | 12575.7842           | <b>Spectrum Type</b>     | DEPT135                                      | <b>Sweep Width (Hz)</b>     | 29761.00                      |        |
|                               |                      |                          |                                              |                             | <b>Temperature (degree C)</b> | 25.600 |

Sat2av500#001.002.001.1r.esp

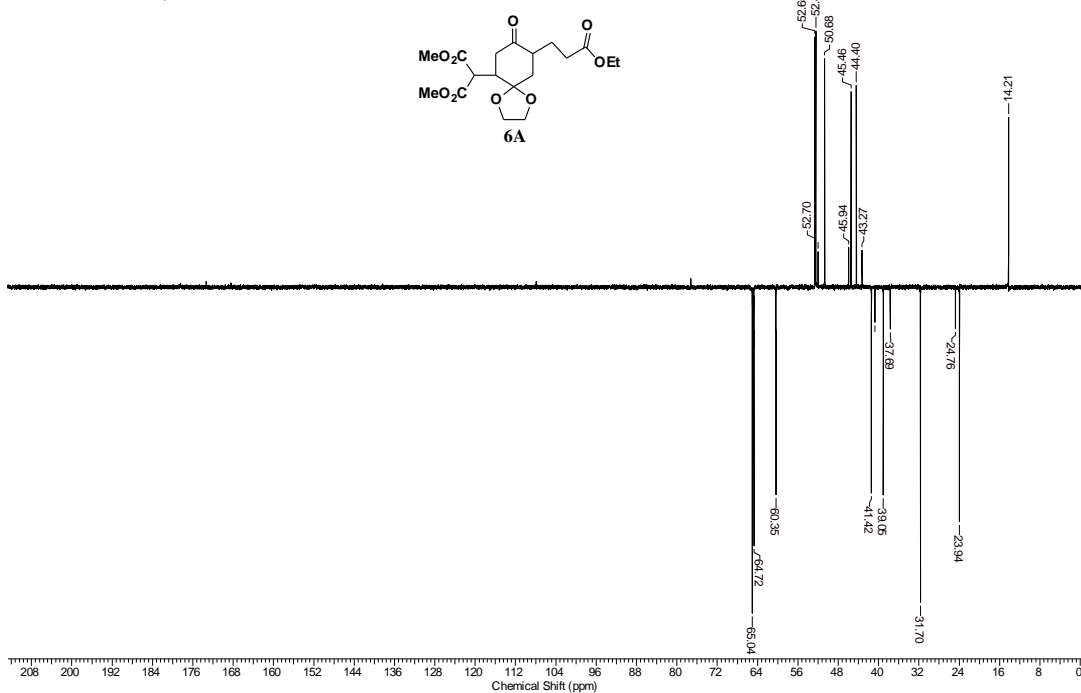

|                               |                      |                          |                                                         |                             |                               |        |
|-------------------------------|----------------------|--------------------------|---------------------------------------------------------|-----------------------------|-------------------------------|--------|
| <b>Acquisition Time (sec)</b> | 1.6384               | <b>Comment</b>           | Priyanka 1H                                             | <b>Date</b>                 | 25 Jun 2012 21:37:36          |        |
| <b>Date Stamp</b>             | 25 Jun 2012 21:37:36 | <b>File Name</b>         | E:\nmrdata\substrate 1 trans Mon5av500#003\1\pdata\1\1r |                             |                               |        |
| <b>Frequency (MHz)</b>        | 500.13               | <b>Nucleus</b>           | 1H                                                      | <b>Number of Transients</b> | 46                            |        |
| <b>Original Points Count</b>  | 16384                | <b>Owner</b>             | nmr                                                     | <b>Points Count</b>         | 32768                         |        |
| <b>Receiver Gain</b>          | 203.00               | <b>SW(cyclical) (Hz)</b> | 10000.00                                                | <b>Solvent</b>              | CHLOROFORM-d                  |        |
| <b>Spectrum Offset (Hz)</b>   | 3310.7805            | <b>Spectrum Type</b>     | STANDARD                                                | <b>Sweep Width (Hz)</b>     | 9999.70                       |        |
|                               |                      |                          |                                                         |                             | <b>Temperature (degree C)</b> | 25.500 |

substrate 1 trans Mon5av500#003.001.001.1r.esp

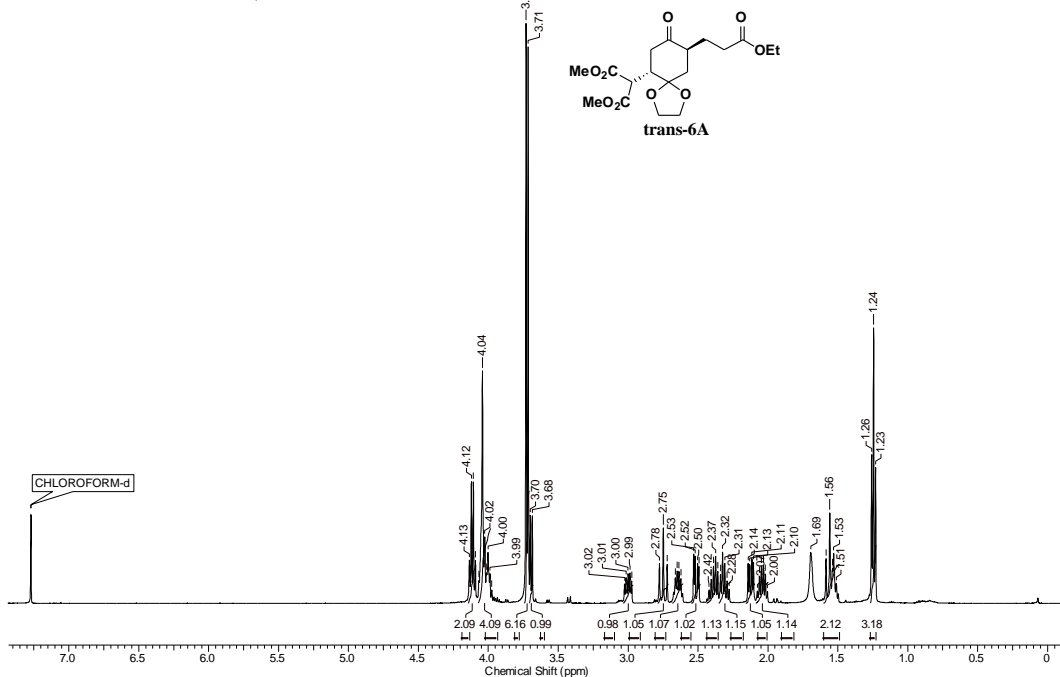

|                               |                      |                          |                                                        |                               |                      |
|-------------------------------|----------------------|--------------------------|--------------------------------------------------------|-------------------------------|----------------------|
| <b>Acquisition Time (sec)</b> | 1.0486               | <b>Comment</b>           | DEPT135                                                | <b>Date</b>                   | 25 Jun 2012 21:41:52 |
| <b>Date Stamp</b>             | 25 Jun 2012 21:41:52 | <b>File Name</b>         | E:\nmrdata\substrate 1 trans Mon5av500#003\2\data\111r |                               |                      |
| <b>Frequency (MHz)</b>        | 125.76               | <b>Nucleus</b>           | <sup>13</sup> C                                        | <b>Number of Transients</b>   | 130                  |
| <b>Original Points Count</b>  | 32768                | <b>Owner</b>             | nmr                                                    | <b>Points Count</b>           | 32768                |
| <b>Receiver Gain</b>          | 2050.00              | <b>SW(cyclical) (Hz)</b> | 31250.00                                               | <b>Solvent</b>                | CHLOROFORM-d         |
| <b>Spectrum Offset (Hz)</b>   | 12545.8027           | <b>Spectrum Type</b>     | DEPT135                                                | <b>Sweep Width (Hz)</b>       | 31249.05             |
|                               |                      |                          |                                                        | <b>Temperature (degree C)</b> | 25.700               |

substrate 1 trans Mon5av500#003.002.001.1r.esp

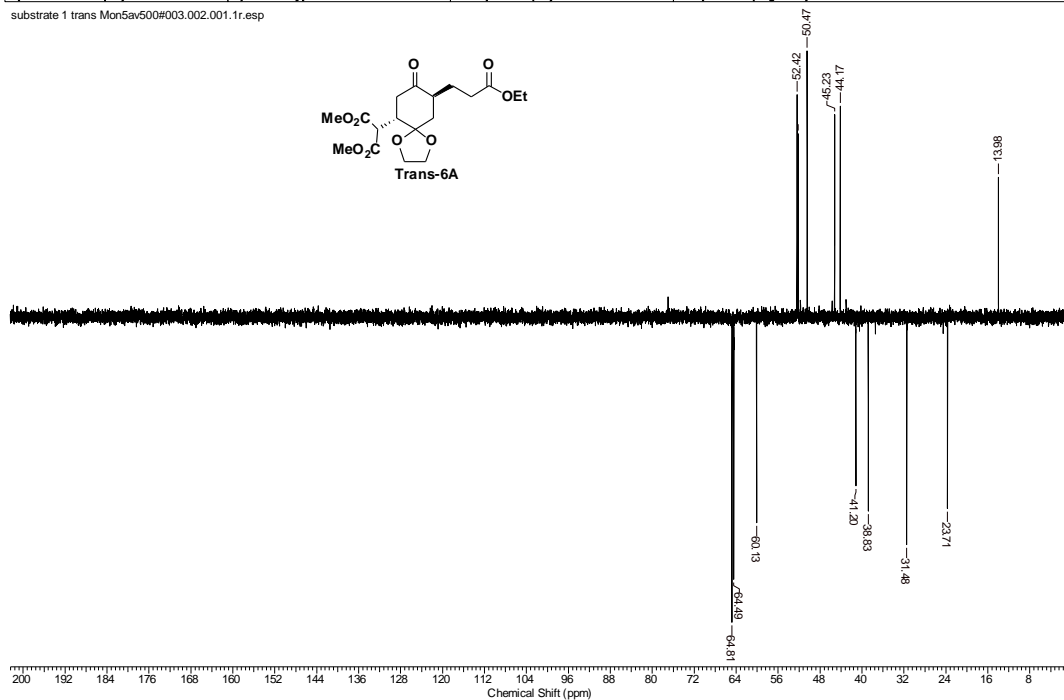

|                               |                      |                          |                                                        |                               |                      |
|-------------------------------|----------------------|--------------------------|--------------------------------------------------------|-------------------------------|----------------------|
| <b>Acquisition Time (sec)</b> | 1.0486               | <b>Comment</b>           | 13C                                                    | <b>Date</b>                   | 25 Jun 2012 21:46:08 |
| <b>Date Stamp</b>             | 25 Jun 2012 21:46:08 | <b>File Name</b>         | E:\nmrdata\substrate 1 trans Mon5av500#003\3\data\111r |                               |                      |
| <b>Frequency (MHz)</b>        | 125.76               | <b>Nucleus</b>           | <sup>13</sup> C                                        | <b>Number of Transients</b>   | 367                  |
| <b>Original Points Count</b>  | 32768                | <b>Owner</b>             | nmr                                                    | <b>Points Count</b>           | 32768                |
| <b>Receiver Gain</b>          | 575.00               | <b>SW(cyclical) (Hz)</b> | 31250.00                                               | <b>Solvent</b>                | CHLOROFORM-d         |
| <b>Spectrum Offset (Hz)</b>   | 12571.5527           | <b>Spectrum Type</b>     | STANDARD                                               | <b>Sweep Width (Hz)</b>       | 31249.05             |
|                               |                      |                          |                                                        | <b>Temperature (degree C)</b> | 26.100               |

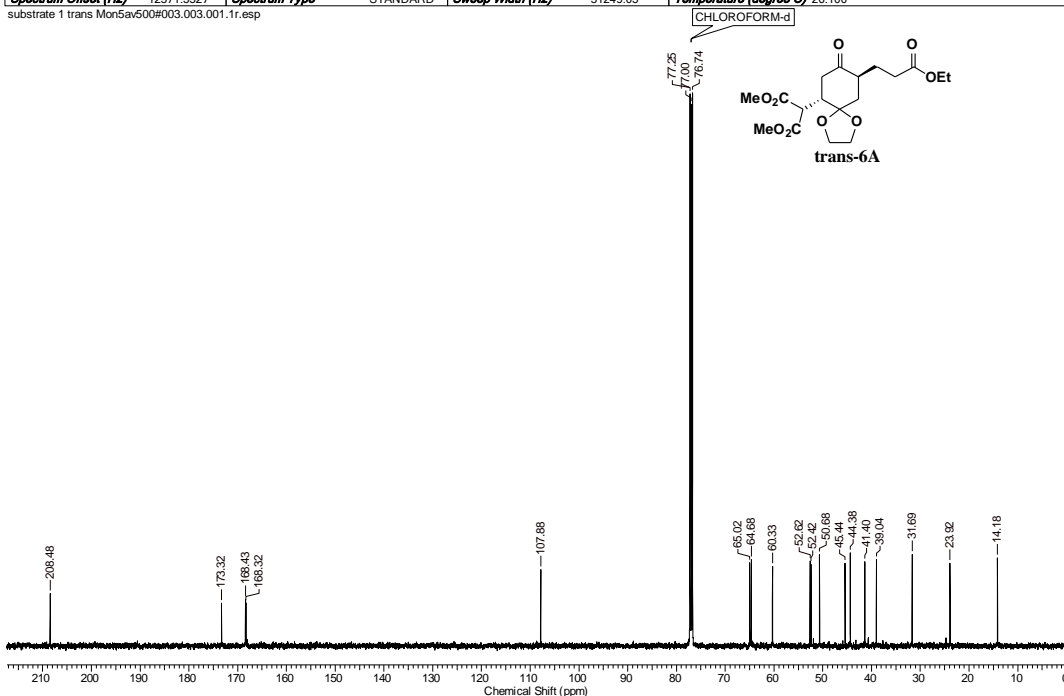



HSQC-1

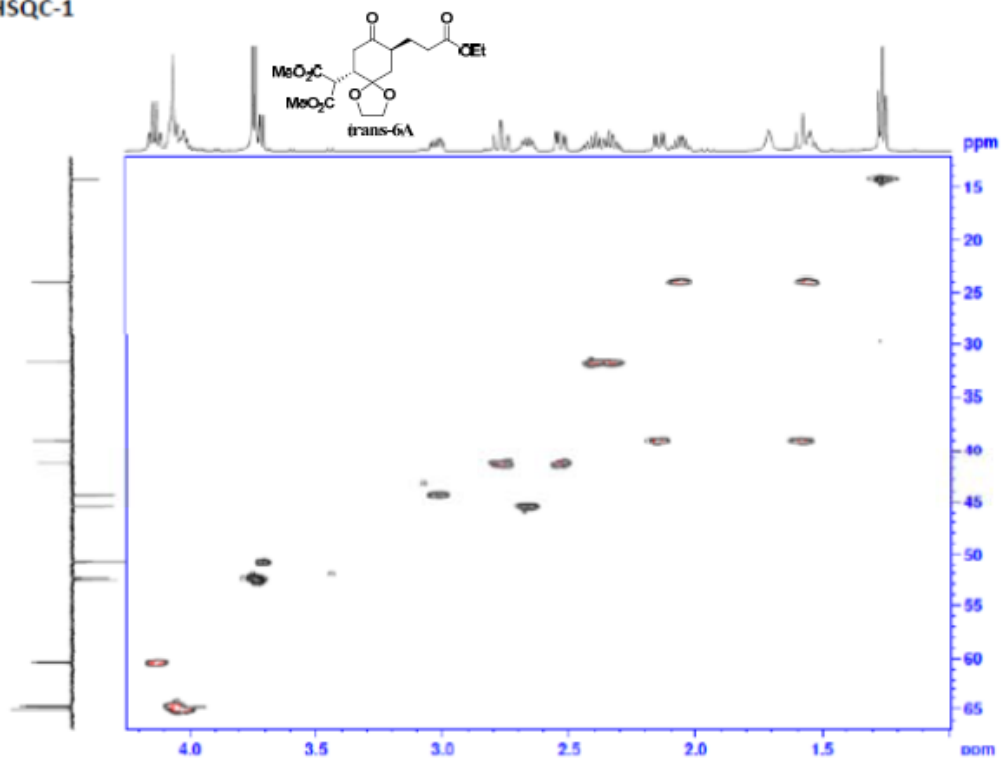

Cosy-1

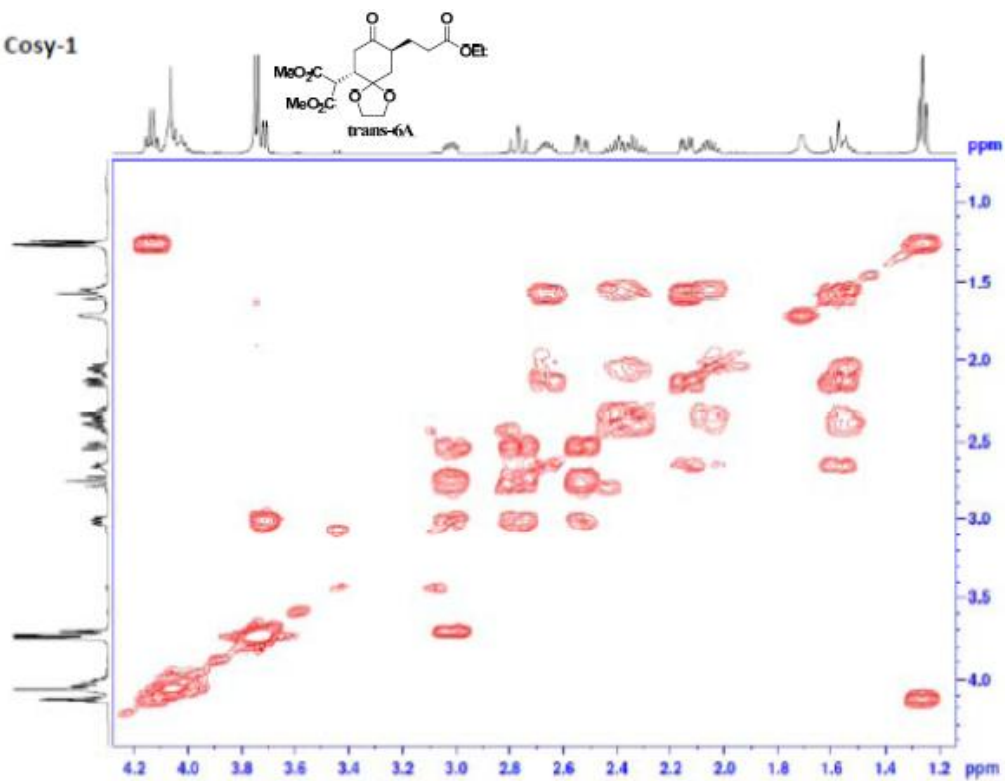

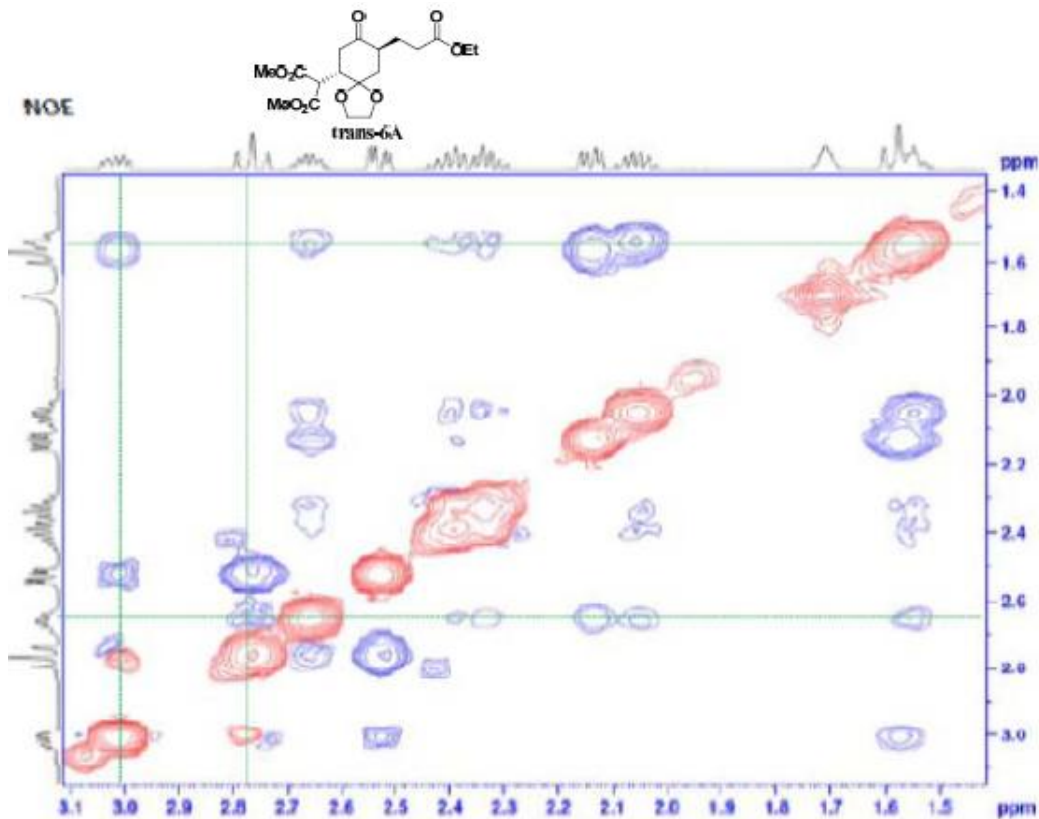

|                        |                      |                    |                                                                    |                        |                      |
|------------------------|----------------------|--------------------|--------------------------------------------------------------------|------------------------|----------------------|
| Acquisition Time (sec) | 1.6384               | Comment            | 1H                                                                 | Date                   | 29 Jun 2012 13:58:56 |
| Date Stamp             | 29 Jun 2012 13:58:56 | File Name          | \\172.16.2.18\nmr_data\AV_500\Jun_12_500Tue5av500#004i8\pddata\11r |                        |                      |
| Frequency (MHz)        | 500.13               | Nucleus            | 1H                                                                 | Number of Transients   | 40                   |
| Original Points Count  | 16384                | Owner              | nmr                                                                | Points Count           | 32768                |
| Receiver Gain          | 406.00               | SW (cyclical) (Hz) | 10000.00                                                           | Solvent                | CHLOROFORM-d         |
| Spectrum Offset (Hz)   | 3310.7805            | Spectrum Type      | STANDARD                                                           | Sweep Width (Hz)       | 9999.70              |
|                        |                      |                    |                                                                    | Temperature (degree C) | 26.500               |
|                        |                      |                    |                                                                    | VerticalScaleFactor    | = 1                  |

Tue5av500#004.008.001.1r.esp

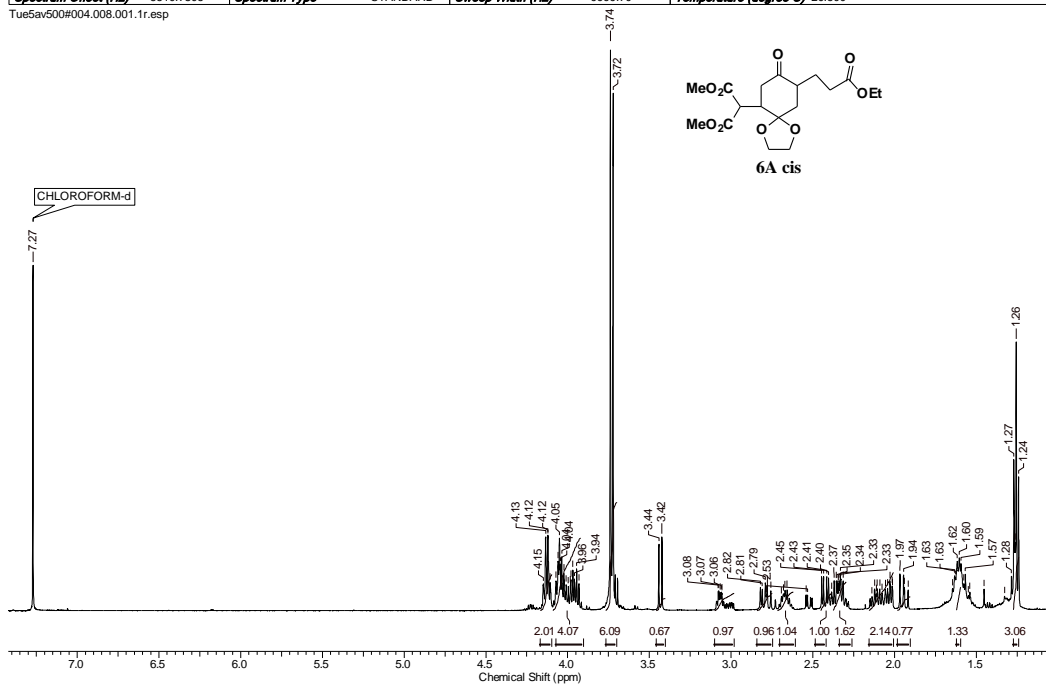

|                        |                      |                   |                                                       |                        |                      |
|------------------------|----------------------|-------------------|-------------------------------------------------------|------------------------|----------------------|
| Acquisition Time (sec) | 1.0486               | Comment           | 13C                                                   | Date                   | 26 Jun 2012 21:37:36 |
| Date Stamp             | 26 Jun 2012 21:37:36 | File Name         | E:\nmrdata\substrate 1 cis Tue5av500#004\3\pdata\111r |                        |                      |
| Frequency (MHz)        | 125.76               | Nucleus           | 13C                                                   | Number of Transients   | 2201                 |
| Original Points Count  | 32768                | Owner             | nmr                                                   | Points Count           | 32768                |
| Receiver Gain          | 575.00               | SW(cyclical) (Hz) | 31250.00                                              | Solvent                | CHLOROFORM-d         |
| Spectrum Offset (Hz)   | 12573.4600           | Spectrum Type     | STANDARD                                              | Sweep Width (Hz)       | 31249.05             |
|                        |                      |                   |                                                       | Temperature (degree C) | 26.300               |

substrate 1 cis Tue5av500#004.003.001.1r.esp

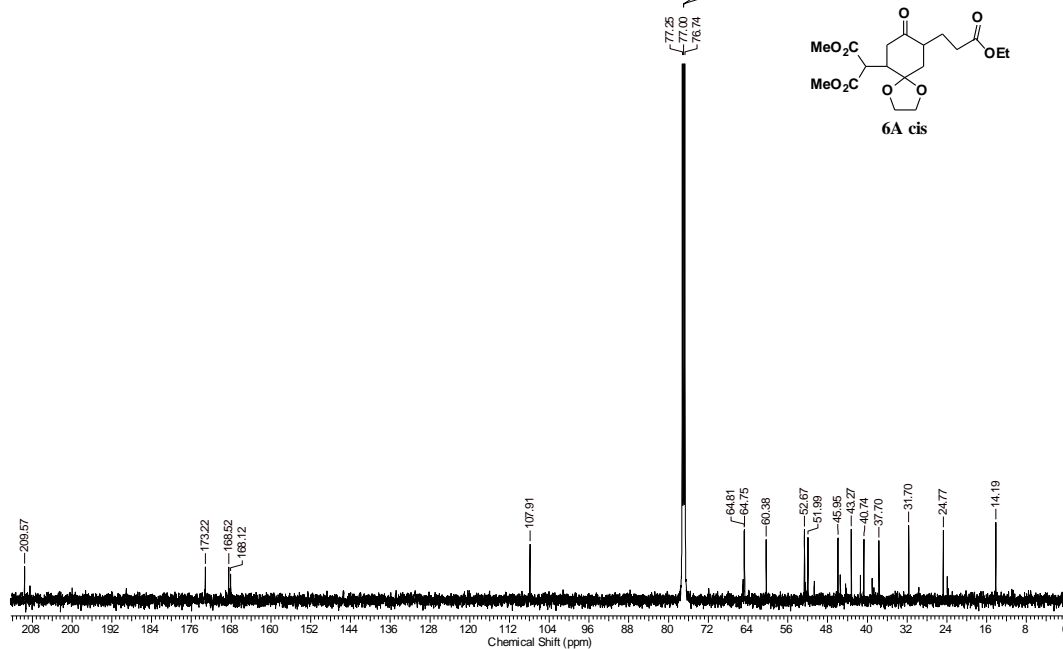

|                        |                      |                   |                                                       |                        |                      |
|------------------------|----------------------|-------------------|-------------------------------------------------------|------------------------|----------------------|
| Acquisition Time (sec) | 1.0486               | Comment           | DEPT135                                               | Date                   | 26 Jun 2012 18:59:44 |
| Date Stamp             | 26 Jun 2012 18:59:44 | File Name         | E:\nmrdata\substrate 1 cis Tue5av500#004\2\pdata\111r |                        |                      |
| Frequency (MHz)        | 125.76               | Nucleus           | 13C                                                   | Number of Transients   | 1200                 |
| Original Points Count  | 32768                | Owner             | nmr                                                   | Points Count           | 32768                |
| Receiver Gain          | 2050.00              | SW(cyclical) (Hz) | 31250.00                                              | Solvent                | CHLOROFORM-d         |
| Spectrum Offset (Hz)   | 12575.7813           | Spectrum Type     | DEPT135                                               | Sweep Width (Hz)       | 31249.05             |
|                        |                      |                   |                                                       | Temperature (degree C) | 25.600               |

substrate 1 cis Tue5av500#004.002.001.1r.esp

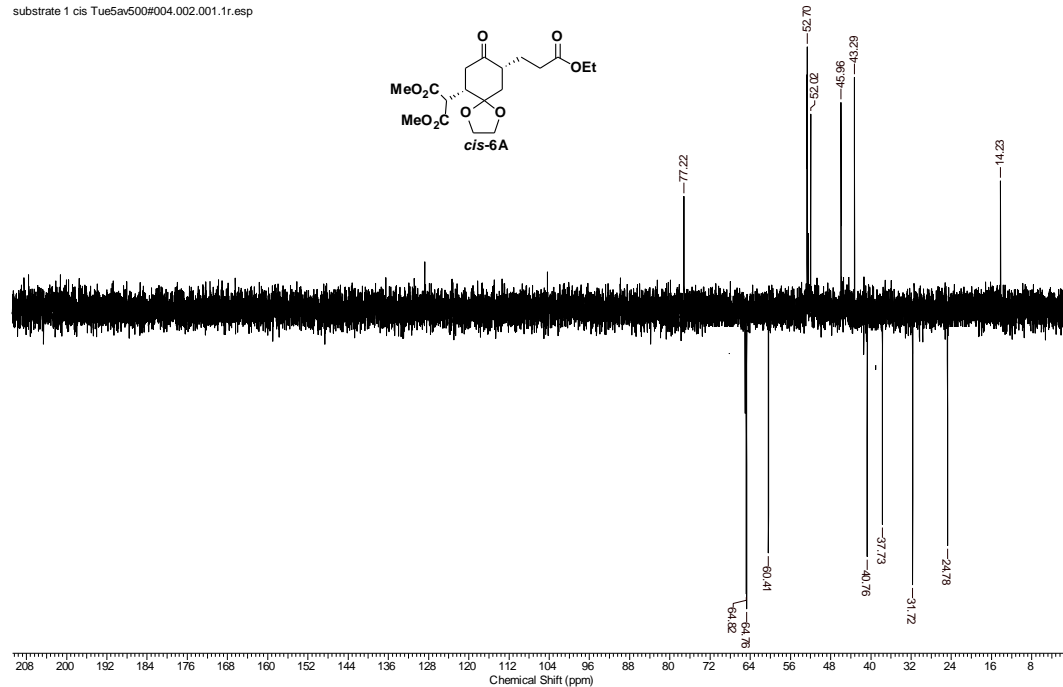

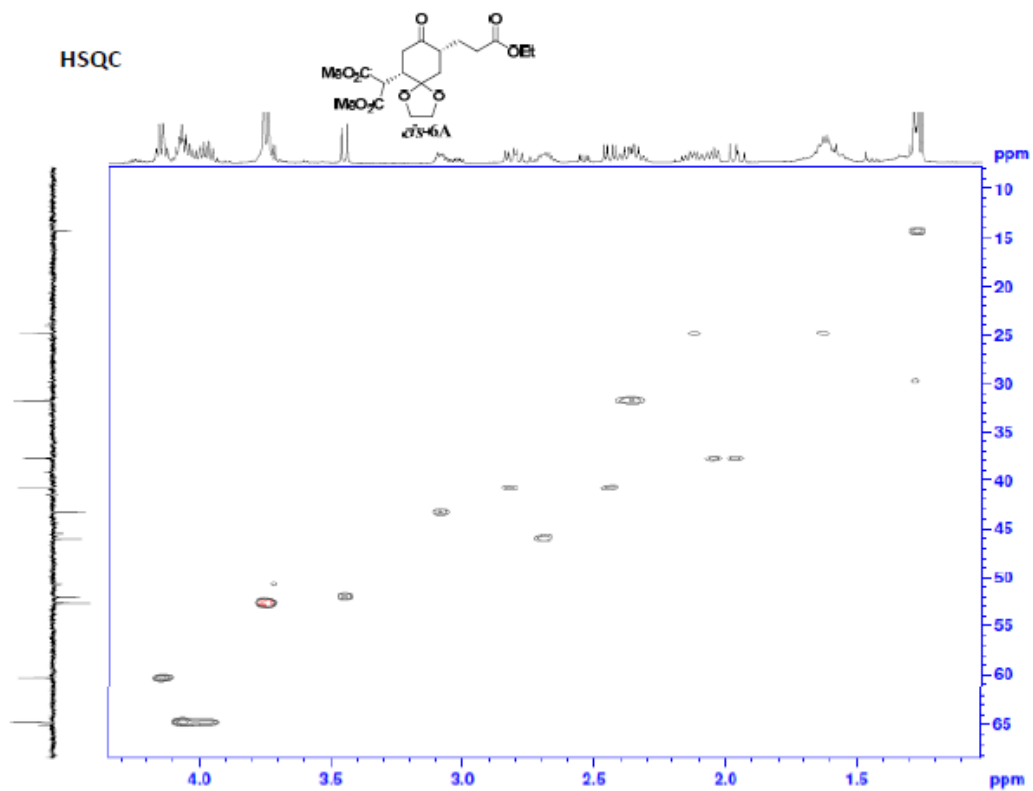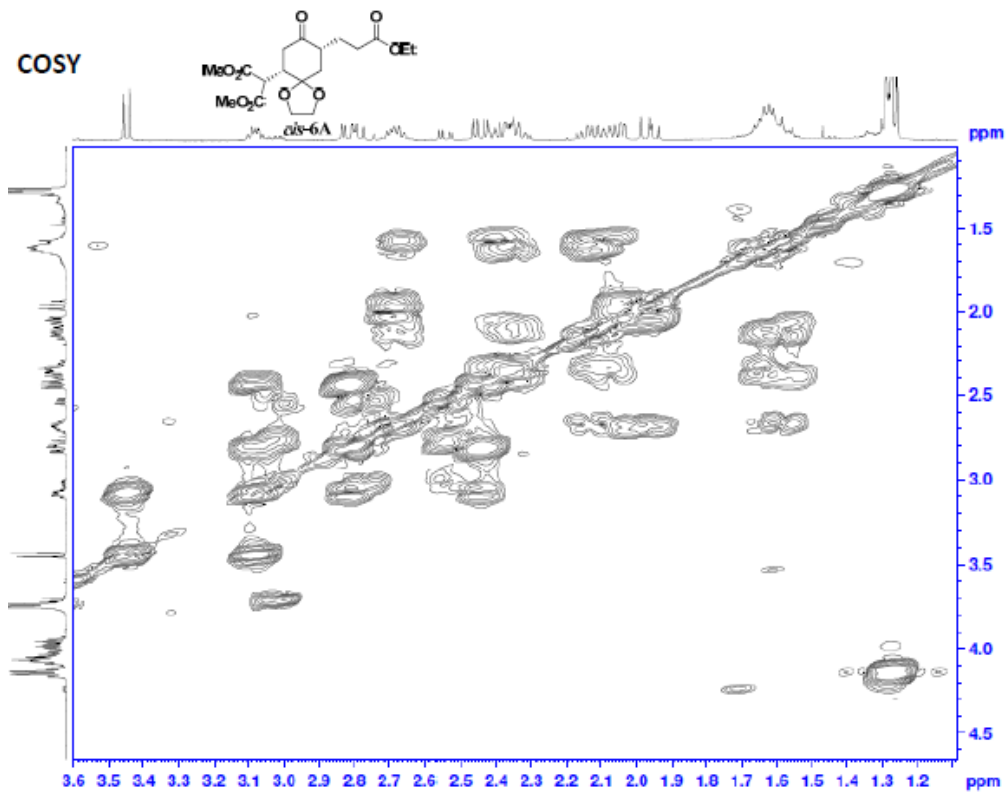

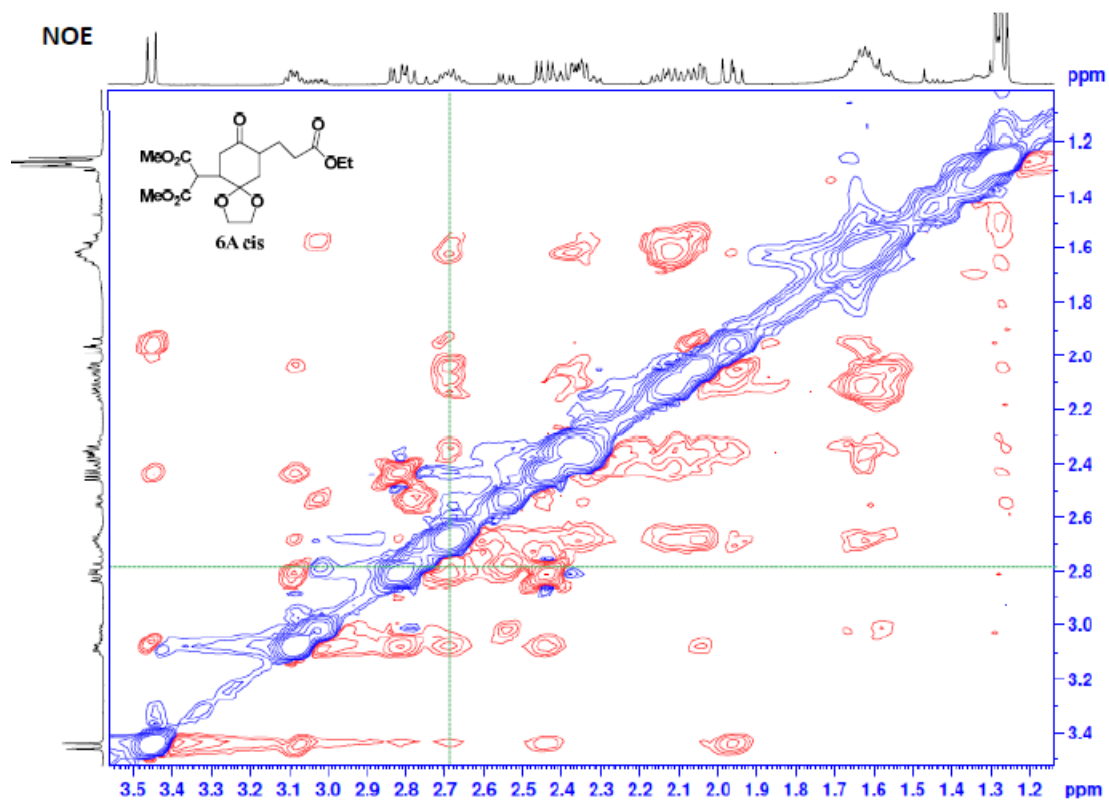

| Acquisition Time (sec) | 1.9923               | Comment           | Priyanka 1H/CDCl3                             | Date                   | 16 Jun 2011 10:14:32 |
|------------------------|----------------------|-------------------|-----------------------------------------------|------------------------|----------------------|
| Date Stamp             | 16 Jun 2011 10:14:32 | File Name         | D:\paper-1\DATA\12\Thu3av400#007\1\pdata1\11r | Origin                 | spect                |
| Frequency (MHz)        | 400.13               | Nucleus           | 1H                                            | Number of Transients   | 64                   |
| Original Points Count  | 16384                | Owner             | Administrator                                 | Points Count           | 32768                |
| Receiver Gain          | 161.00               | SW(cyclical) (Hz) | 8223.68                                       | Solvent                | CHLOROFORM-d         |
| Spectrum Offset (Hz)   | 2465.1101            | Spectrum Type     | STANDARD                                      | Sweep Width (Hz)       | 8223.43              |
|                        |                      |                   |                                               | Temperature (degree C) | 22.800               |

Thu3av400#007.001.001.1r.esp

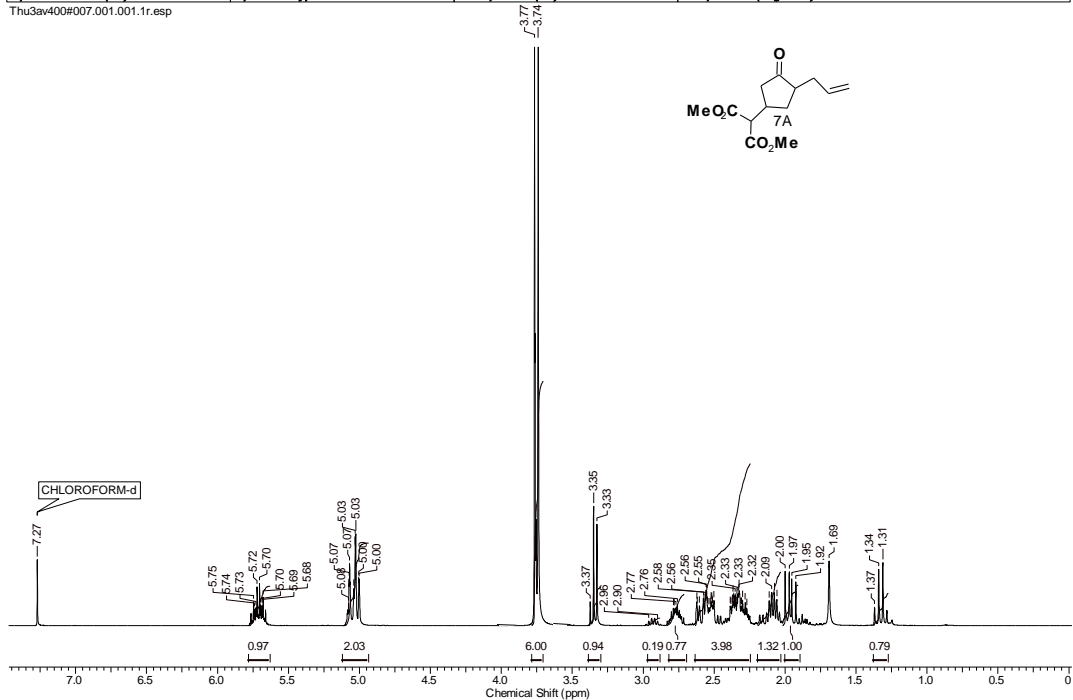

|                               |                      |                          |          |                               |                                               |
|-------------------------------|----------------------|--------------------------|----------|-------------------------------|-----------------------------------------------|
| <b>Acquisition Time (sec)</b> | 0.6488               | <b>Comment</b>           | 13C      | <b>Date</b>                   | 16 Jun 2011 10:38:00                          |
| <b>Date Stamp</b>             | 16 Jun 2011 10:38:00 | <b>File Name</b>         |          | <b>File Name</b>              | D:\paper-1\DATA\12\Thu3av400#007\3\pdata1\11r |
| <b>Frequency (MHz)</b>        | 100.61               | <b>Nucleus</b>           | 13C      | <b>Number of Transients</b>   | 1210                                          |
| <b>Original Points Count</b>  | 16384                | <b>Owner</b>             | root     | <b>Points Count</b>           | 32768                                         |
| <b>Receiver Gain</b>          | 912.00               | <b>SW(cyclical) (Hz)</b> | 25252.53 | <b>Solvent</b>                | CHLOROFORM-d                                  |
| <b>Spectrum Offset (Hz)</b>   | 9554.7334            | <b>Spectrum Type</b>     | STANDARD | <b>Sweep Width (Hz)</b>       | 25251.75                                      |
|                               |                      |                          |          | <b>Temperature (degree C)</b> | 23.100                                        |

Thu3av400#007.003.001.1r.esp

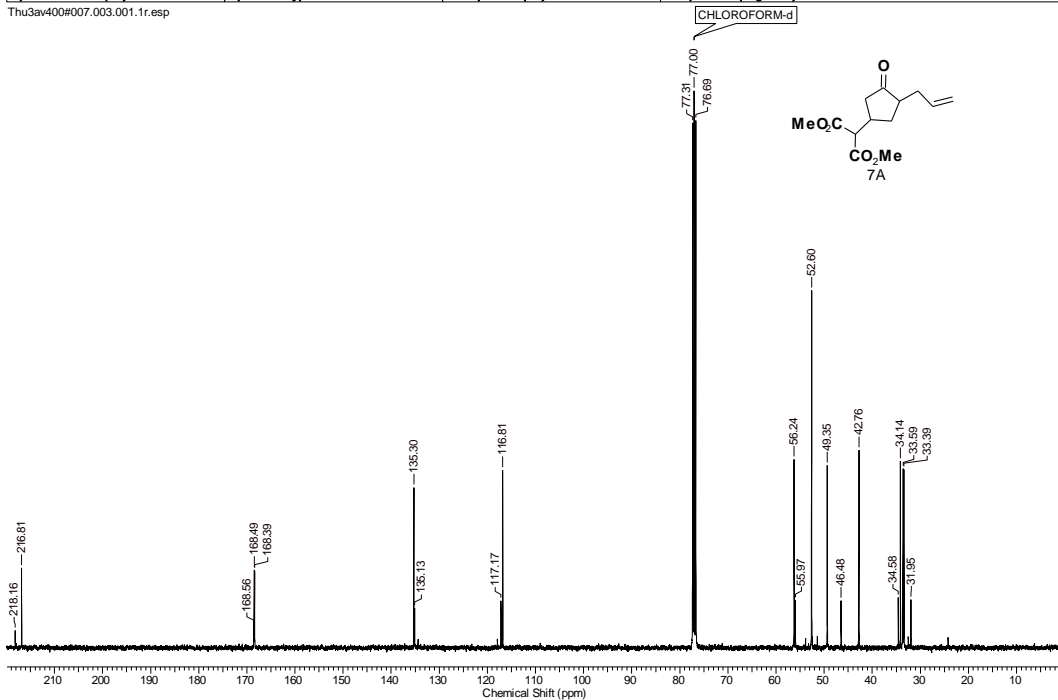

|                               |                      |                          |            |                               |                                               |
|-------------------------------|----------------------|--------------------------|------------|-------------------------------|-----------------------------------------------|
| <b>Acquisition Time (sec)</b> | 0.6816               | <b>Comment</b>           | Dept/CDCI3 | <b>Date</b>                   | 16 Jun 2011 10:18:48                          |
| <b>Date Stamp</b>             | 16 Jun 2011 10:18:48 | <b>File Name</b>         |            | <b>File Name</b>              | E:\paper-1\DATA\12\Thu3av400#007\2\pdata1\11r |
| <b>Frequency (MHz)</b>        | 100.61               | <b>Nucleus</b>           | 13C        | <b>Number of Transients</b>   | 402                                           |
| <b>Original Points Count</b>  | 16384                | <b>Owner</b>             | root       | <b>Points Count</b>           | 32768                                         |
| <b>Receiver Gain</b>          | 16384.00             | <b>SW(cyclical) (Hz)</b> | 24038.46   | <b>Solvent</b>                | CHLOROFORM-d                                  |
| <b>Spectrum Offset (Hz)</b>   | 10060.3320           | <b>Spectrum Type</b>     | DEPT135    | <b>Sweep Width (Hz)</b>       | 24037.73                                      |
|                               |                      |                          |            | <b>Temperature (degree C)</b> | 22.800                                        |

Thu3av400#007.002.001.1r.esp

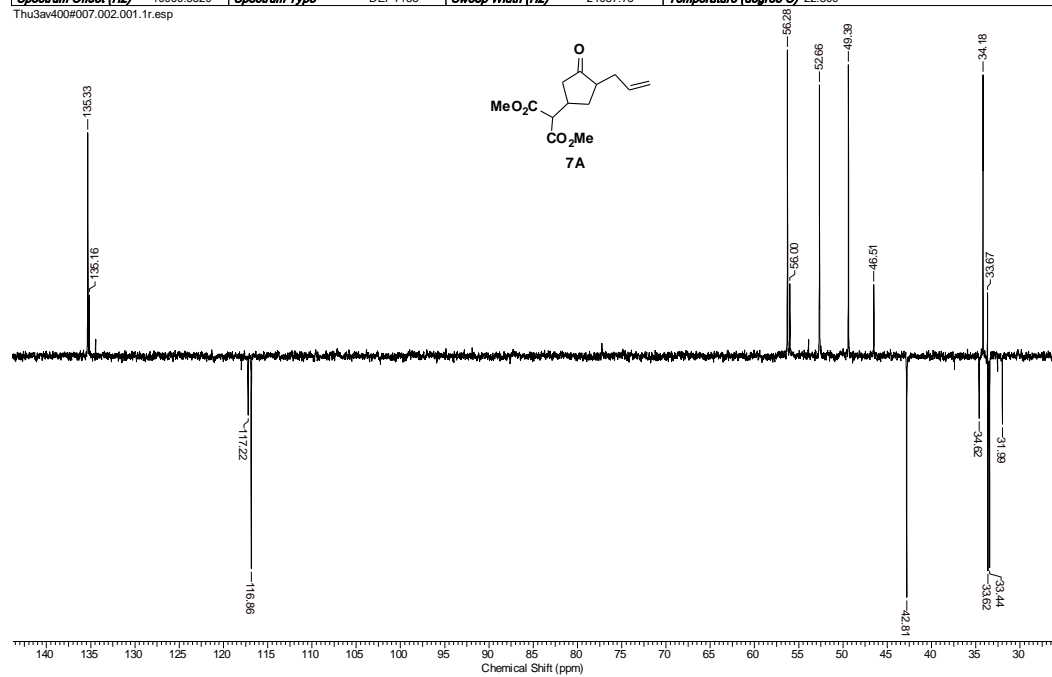

|                               |                      |                          |                                             |                               |                      |
|-------------------------------|----------------------|--------------------------|---------------------------------------------|-------------------------------|----------------------|
| <b>Acquisition Time (sec)</b> | 1.9923               | <b>Comment</b>           | Priyanka 1H/CDCl3                           | <b>Date</b>                   | 16 Jun 2011 12:09:44 |
| <b>Date Stamp</b>             | 16 Jun 2011 12:09:44 | <b>File Name</b>         | D:\paper-1\DATA\9\Thu3av400#011\1\pdata111r | <b>Number of Transients</b>   | 64                   |
| <b>Frequency (MHz)</b>        | 400.13               | <b>Nucleus</b>           | 1H                                          | <b>Points Count</b>           | 32768                |
| <b>Original Points Count</b>  | 16384                | <b>Owner</b>             | Administrator                               | <b>Pulse Sequence</b>         | zg30                 |
| <b>Receiver Gain</b>          | 322.00               | <b>SW(cyclical) (Hz)</b> | 8223.68                                     | <b>Solvent</b>                | CHLOROFORM-d         |
| <b>Spectrum Offset (Hz)</b>   | 2465.1101            | <b>Spectrum Type</b>     | STANDARD                                    | <b>Sweep Width (Hz)</b>       | 8223.43              |
|                               |                      |                          |                                             | <b>Temperature (degree C)</b> | 22.500               |

Thu3av400#011.001.001.1r.esp

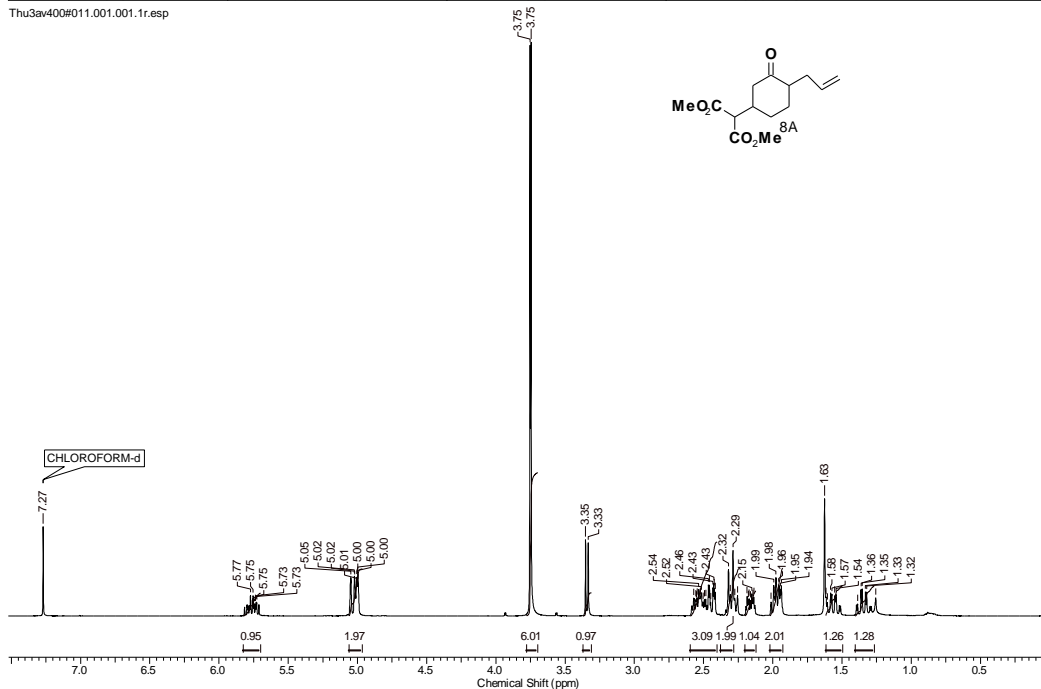

|                               |                      |                          |                                             |                               |                      |
|-------------------------------|----------------------|--------------------------|---------------------------------------------|-------------------------------|----------------------|
| <b>Acquisition Time (sec)</b> | 0.6488               | <b>Comment</b>           | 13C                                         | <b>Date</b>                   | 16 Jun 2011 13:11:36 |
| <b>Date Stamp</b>             | 16 Jun 2011 13:11:36 | <b>File Name</b>         | D:\paper-1\DATA\9\Thu3av400#011\3\pdata111r | <b>Number of Transients</b>   | 1104                 |
| <b>Frequency (MHz)</b>        | 100.61               | <b>Nucleus</b>           | 13C                                         | <b>Points Count</b>           | 32768                |
| <b>Original Points Count</b>  | 16384                | <b>Owner</b>             | root                                        | <b>Pulse Sequence</b>         | zgpg30               |
| <b>Receiver Gain</b>          | 912.00               | <b>SW(cyclical) (Hz)</b> | 25252.53                                    | <b>Solvent</b>                | CHLOROFORM-d         |
| <b>Spectrum Offset (Hz)</b>   | 9556.2744            | <b>Spectrum Type</b>     | STANDARD                                    | <b>Sweep Width (Hz)</b>       | 25251.75             |
|                               |                      |                          |                                             | <b>Temperature (degree C)</b> | 23.300               |

Thu3av400#011.003.001.1r.esp

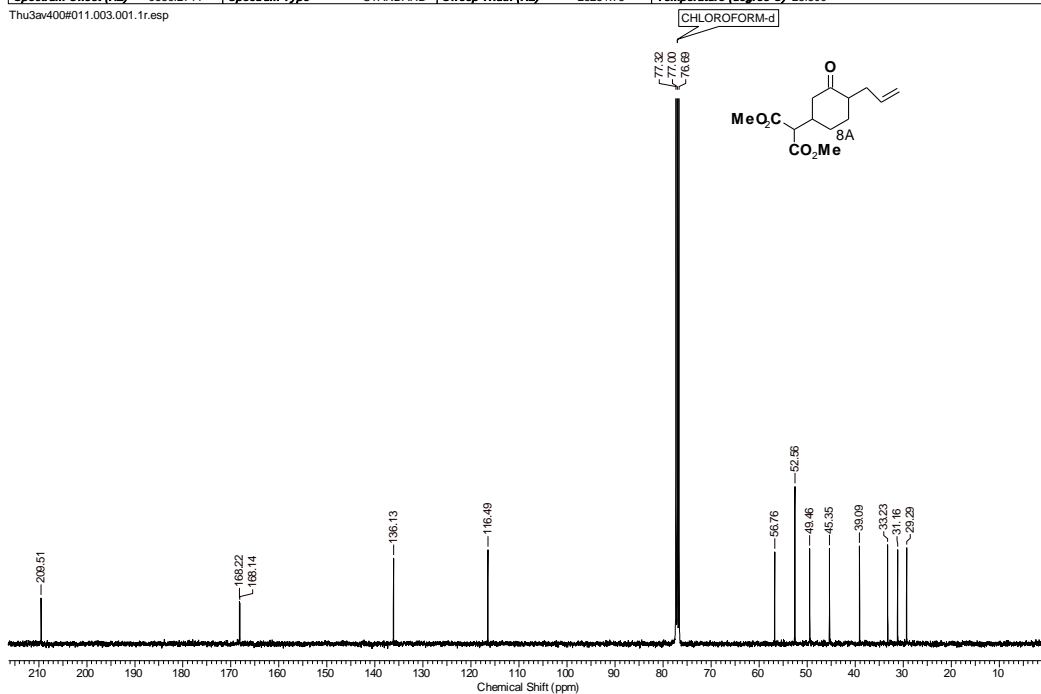

|                               |                      |                          |            |                               |                                           |
|-------------------------------|----------------------|--------------------------|------------|-------------------------------|-------------------------------------------|
| <b>Acquisition Time (sec)</b> | 0.6816               | <b>Comment</b>           | Dept/CDCI3 | <b>Date</b>                   | 16 Jun 2011 12:16:08                      |
| <b>Date Stamp</b>             | 16 Jun 2011 12:16:08 |                          |            | <b>File Name</b>              | E:\paper-1\DATA\9\Thu3av400#0112\data111r |
| <b>Frequency (MHz)</b>        | 100.61               | <b>Nucleus</b>           | 13C        | <b>Number of Transients</b>   | 250                                       |
| <b>Original Points Count</b>  | 16384                | <b>Owner</b>             | root       | <b>Points Count</b>           | 32768                                     |
| <b>Receiver Gain</b>          | 16384.00             | <b>SW(cyclical) (Hz)</b> | 24038.46   | <b>Solvent</b>                | CHLOROFORM-d                              |
| <b>Spectrum Offset (Hz)</b>   | 10060.3320           | <b>Spectrum Type</b>     | DEPT135    | <b>Sweep Width (Hz)</b>       | 24037.73                                  |
|                               |                      |                          |            | <b>Temperature (degree C)</b> | 22.600                                    |
|                               |                      |                          |            |                               | VerticalScaleFactor = 1                   |

Thu3av400#011.002.001.1r.esp

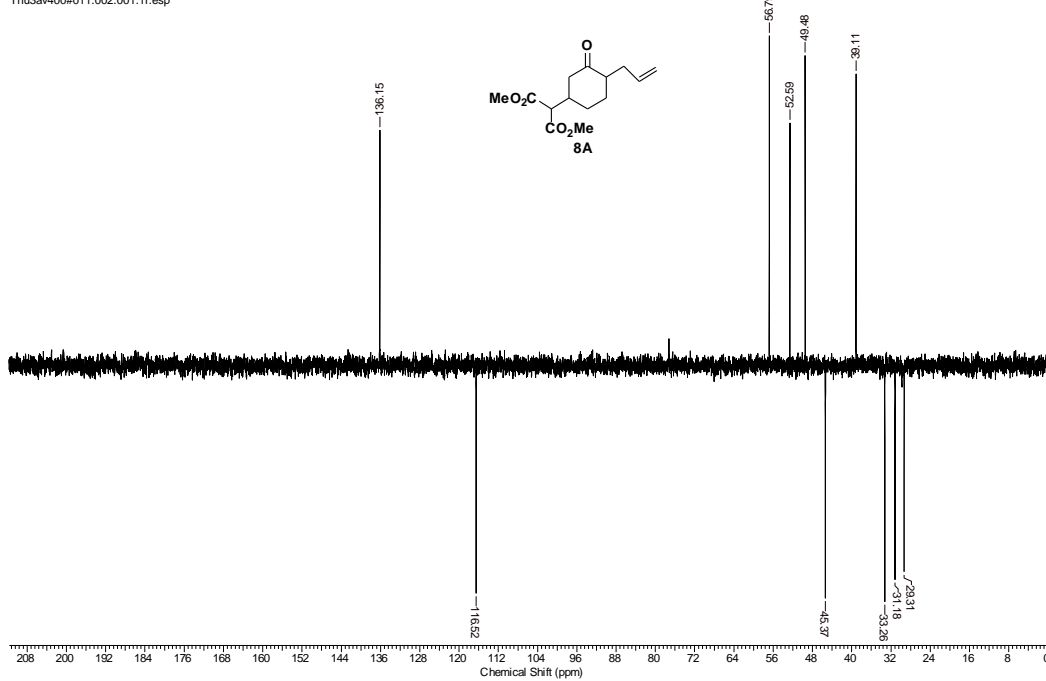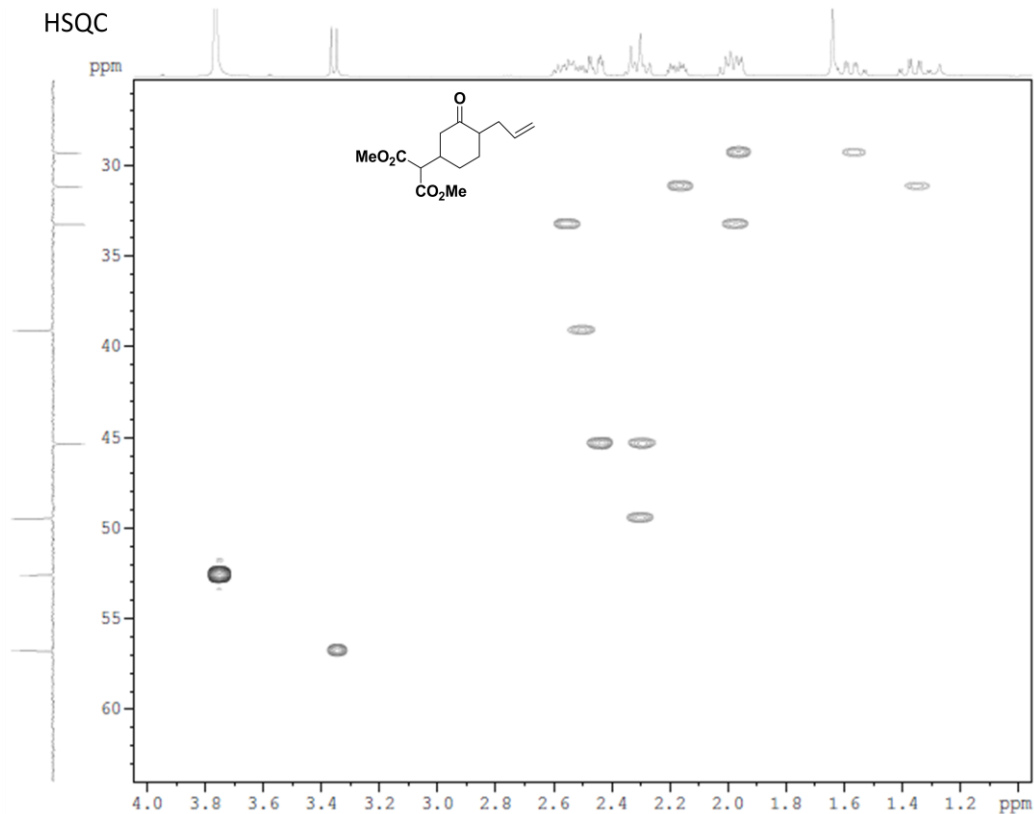



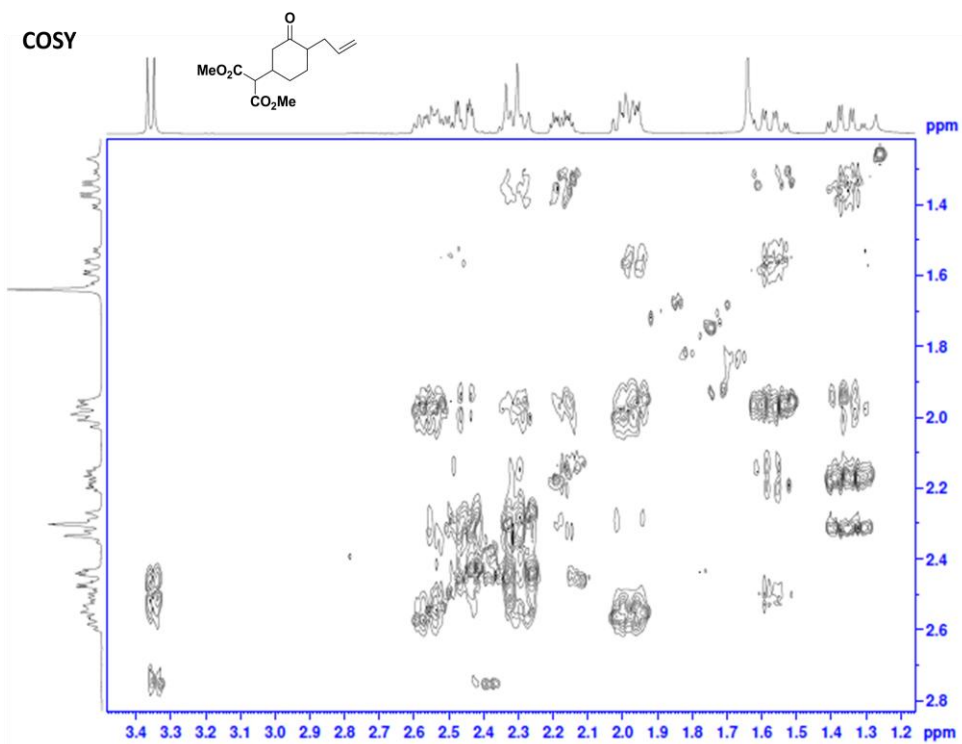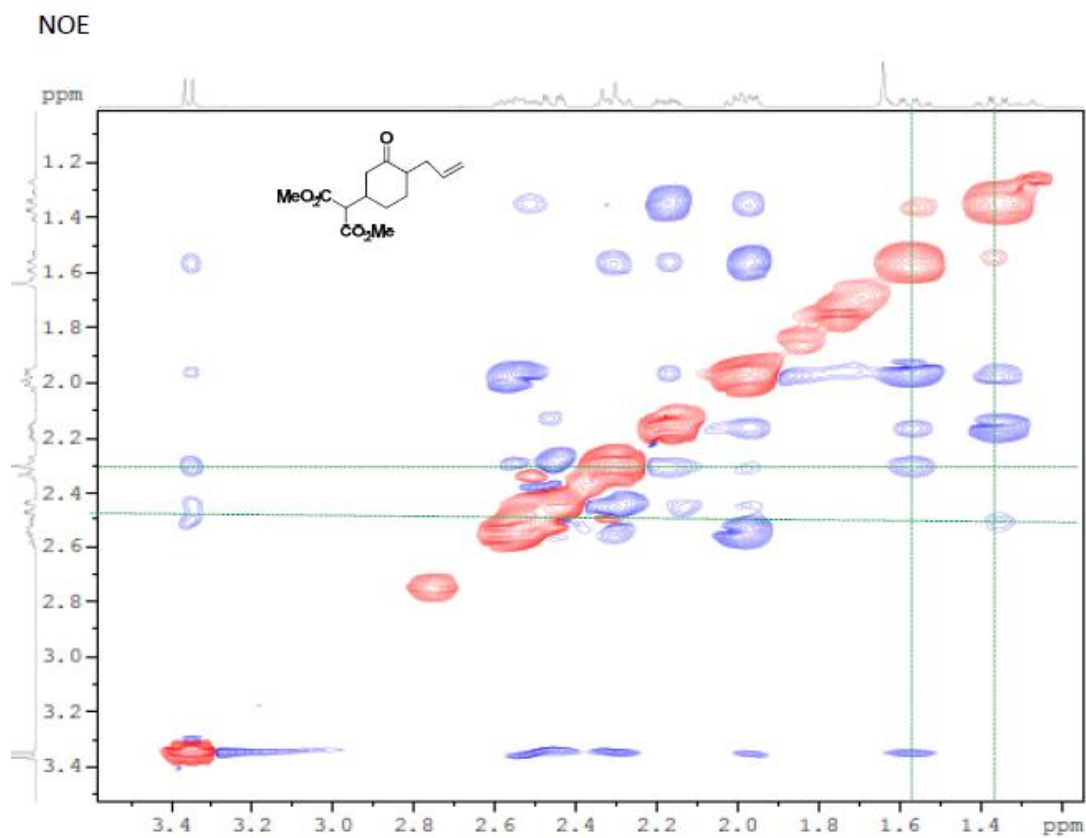

|                               |                      |                          |                                                |                               |                      |
|-------------------------------|----------------------|--------------------------|------------------------------------------------|-------------------------------|----------------------|
| <b>Acquisition Time (sec)</b> | 1.9923               | <b>Comment</b>           | Priyanka 1H/CDCL3                              | <b>Date</b>                   | 11 Aug 2011 17:16:56 |
| <b>Date Stamp</b>             | 11 Aug 2011 17:16:56 | <b>File Name</b>         | D:\paper-1\DATA\10\Thu2av400#007\1\pdata1\1\1r | <b>Number of Transients</b>   | 32                   |
| <b>Frequency (MHz)</b>        | 400.13               | <b>Nucleus</b>           | 1H                                             | <b>Origin</b>                 | spect                |
| <b>Original Points Count</b>  | 16384                | <b>Owner</b>             | Administrator                                  | <b>Points Count</b>           | 32768                |
| <b>Receiver Gain</b>          | 161.00               | <b>SW(cyclical) (Hz)</b> | 8223.68                                        | <b>Solvent</b>                | CHLOROFORM-d         |
| <b>Spectrum Offset (Hz)</b>   | 2465.3613            | <b>Spectrum Type</b>     | STANDARD                                       | <b>Sweep Width (Hz)</b>       | 8223.43              |
|                               |                      |                          |                                                | <b>Temperature (degree C)</b> | 23.300               |

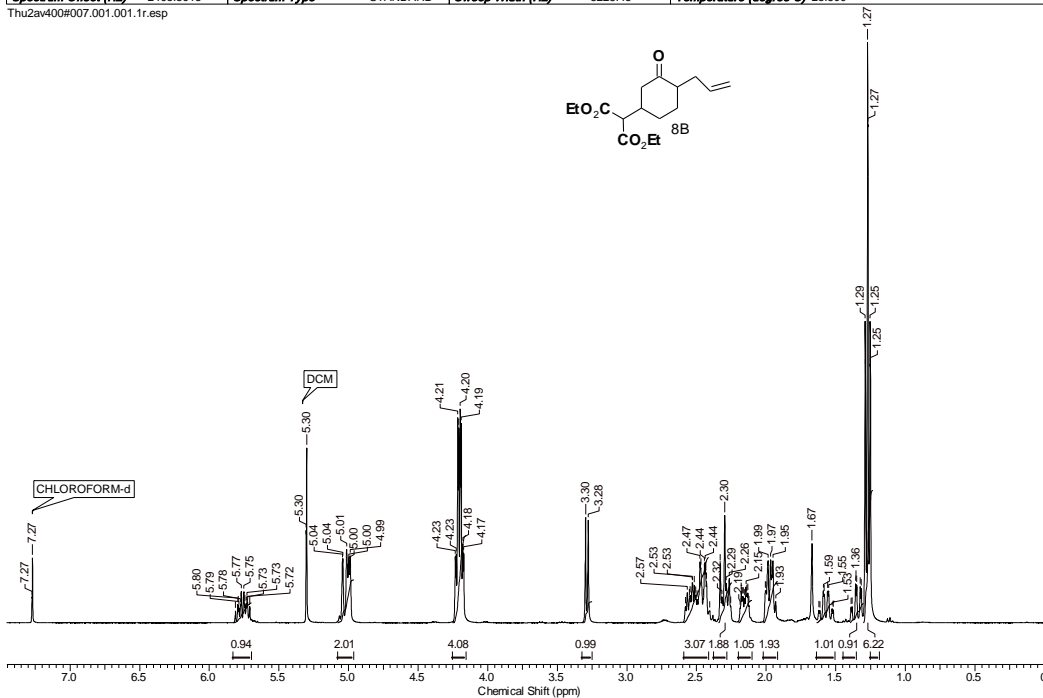

|                               |                      |                          |                                                |                               |                      |
|-------------------------------|----------------------|--------------------------|------------------------------------------------|-------------------------------|----------------------|
| <b>Acquisition Time (sec)</b> | 0.6488               | <b>Comment</b>           | 13C                                            | <b>Date</b>                   | 11 Aug 2011 18:06:00 |
| <b>Date Stamp</b>             | 11 Aug 2011 18:06:00 | <b>File Name</b>         | E:\paper-1\DATA\10\Thu2av400#007\3\pdata1\1\1r | <b>Number of Transients</b>   | 1570                 |
| <b>Frequency (MHz)</b>        | 100.61               | <b>Nucleus</b>           | 13C                                            | <b>Origin</b>                 | spect                |
| <b>Original Points Count</b>  | 16384                | <b>Owner</b>             | root                                           | <b>Points Count</b>           | 32768                |
| <b>Receiver Gain</b>          | 912.00               | <b>SW(cyclical) (Hz)</b> | 25252.53                                       | <b>Solvent</b>                | CHLOROFORM-d         |
| <b>Spectrum Offset (Hz)</b>   | 9554.7334            | <b>Spectrum Type</b>     | STANDARD                                       | <b>Sweep Width (Hz)</b>       | 25251.75             |
|                               |                      |                          |                                                | <b>Temperature (degree C)</b> | 23.700               |

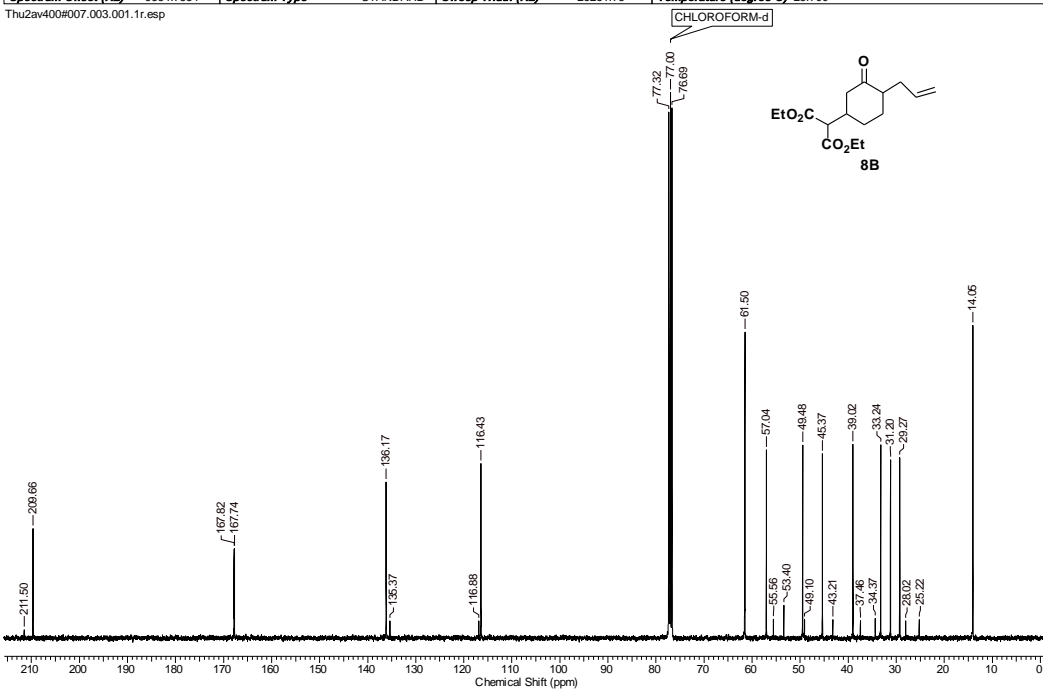

|                         |                      |                   |                                               |                        |                      |
|-------------------------|----------------------|-------------------|-----------------------------------------------|------------------------|----------------------|
| Acquisition Time (sec)  | 0.6816               | Comment           | Dept                                          | Date                   | 11 Aug 2011 17:19:04 |
| Date Stamp              | 11 Aug 2011 17:19:04 | File Name         | E:\paper-1\DATA\110\Thu2av400#0072\pdata1\11r |                        |                      |
| Frequency (MHz)         | 100.61               | Nucleus           | 13C                                           | Number of Transients   | 831                  |
| Original Points Count   | 16384                | Owner             | root                                          | Points Count           | 32768                |
| Receiver Gain           | 16384.00             | SW(cyclical) (Hz) | 24038.46                                      | Solvent                | CHLOROFORM-d         |
| Spectrum Offset (Hz)    | 10036.3682           | Spectrum Type     | DEPT135                                       | Sweep Width (Hz)       | 24037.73             |
|                         |                      |                   |                                               | Temperature (degree C) | 23.400               |
| VerticalScaleFactor = 1 |                      |                   |                                               |                        |                      |

Thu2av400#007.002.001.1r.esp

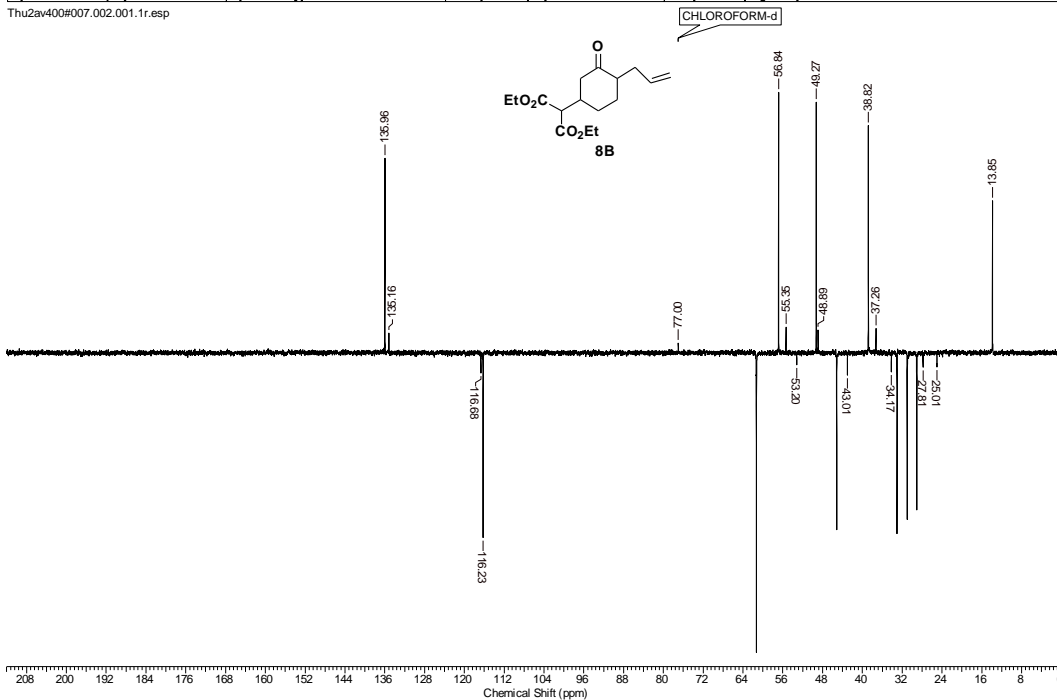

|                        |                      |                   |                                              |                        |                      |
|------------------------|----------------------|-------------------|----------------------------------------------|------------------------|----------------------|
| Acquisition Time (sec) | 1.9923               | Comment           | Privanka 1H/CDCl3                            | Date                   | 14 Jun 2011 14:24:08 |
| Date Stamp             | 14 Jun 2011 14:24:08 | File Name         | D:\paper-1\DATA\14\Tue3av400#0101\pdata1\11r |                        |                      |
| Frequency (MHz)        | 400.13               | Nucleus           | 1H                                           | Number of Transients   | 64                   |
| Original Points Count  | 16384                | Owner             | Administrator                                | Points Count           | 32768                |
| Receiver Gain          | 228.00               | SW(cyclical) (Hz) | 8223.68                                      | Solvent                | CHLOROFORM-d         |
| Spectrum Offset (Hz)   | 2465.1101            | Spectrum Type     | STANDARD                                     | Sweep Width (Hz)       | 8223.43              |
|                        |                      |                   |                                              | Temperature (degree C) | 22.400               |

Tue3av400#010.001.001.1r.esp

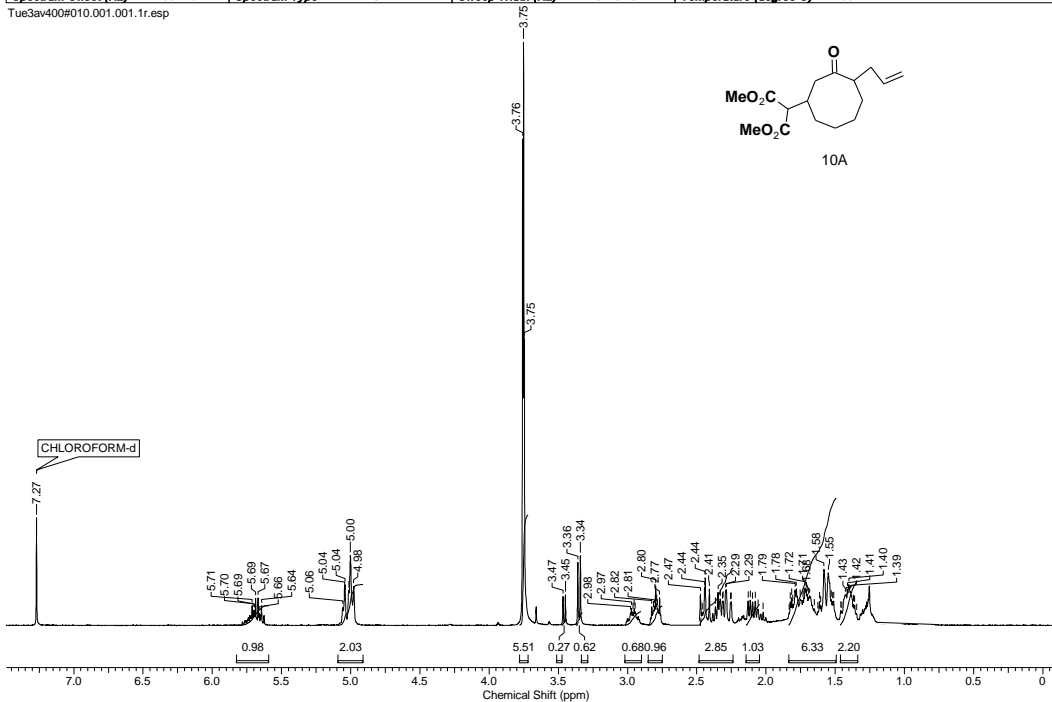

|                               |                      |                          |                                             |                               |                      |
|-------------------------------|----------------------|--------------------------|---------------------------------------------|-------------------------------|----------------------|
| <b>Acquisition Time (sec)</b> | 0.6488               | <b>Comment</b>           | Priyanka 13C                                | <b>Date</b>                   | 14 Jun 2011 15:06:48 |
| <b>Date Stamp</b>             | 14 Jun 2011 15:06:48 | <b>File Name</b>         | D:\paper-1\DATA\14\Tue3av400#010\3\data\11r |                               |                      |
| <b>Frequency (MHz)</b>        | 100.61               | <b>Nucleus</b>           | 13C                                         | <b>Number of Transients</b>   | 1165                 |
| <b>Original Points Count</b>  | 16384                | <b>Owner</b>             | root                                        | <b>Points Count</b>           | 32768                |
| <b>Receiver Gain</b>          | 2050.00              | <b>SW(cyclical) (Hz)</b> | 25252.53                                    | <b>Solvent</b>                | CHLOROFORM-d         |
| <b>Spectrum Offset (Hz)</b>   | 9555.5039            | <b>Spectrum Type</b>     | STANDARD                                    | <b>Sweep Width (Hz)</b>       | 25251.75             |
|                               |                      |                          |                                             | <b>Temperature (degree C)</b> | 22.600               |

Tue3av400#010.003.001.1r.esp

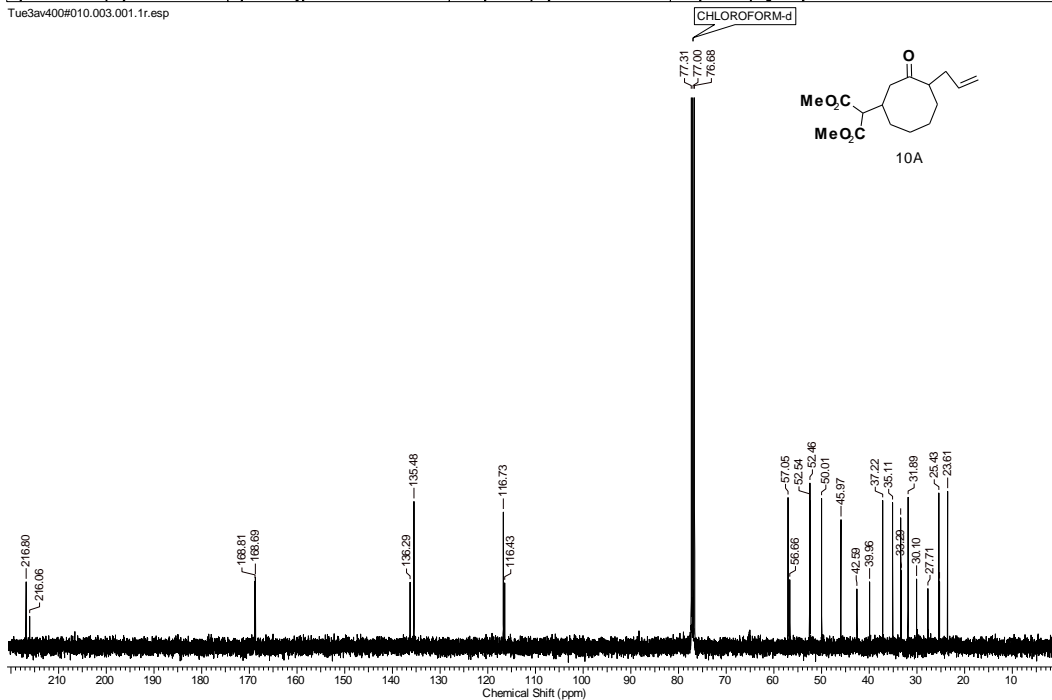

|                               |                      |                          |                                             |                               |                      |
|-------------------------------|----------------------|--------------------------|---------------------------------------------|-------------------------------|----------------------|
| <b>Acquisition Time (sec)</b> | 0.6816               | <b>Comment</b>           | Priyanka Dept/CDC13                         | <b>Date</b>                   | 14 Jun 2011 14:34:48 |
| <b>Date Stamp</b>             | 14 Jun 2011 14:34:48 | <b>File Name</b>         | E:\paper-1\DATA\14\Tue3av400#010\2\data\11r |                               |                      |
| <b>Frequency (MHz)</b>        | 100.61               | <b>Nucleus</b>           | 13C                                         | <b>Number of Transients</b>   | 752                  |
| <b>Original Points Count</b>  | 16384                | <b>Owner</b>             | root                                        | <b>Points Count</b>           | 32768                |
| <b>Receiver Gain</b>          | 16384.00             | <b>SW(cyclical) (Hz)</b> | 24038.46                                    | <b>Solvent</b>                | CHLOROFORM-d         |
| <b>Spectrum Offset (Hz)</b>   | 10060.3320           | <b>Spectrum Type</b>     | DEPT135                                     | <b>Sweep Width (Hz)</b>       | 24037.73             |
|                               |                      |                          |                                             | <b>Temperature (degree C)</b> | 22.600               |
| VerticalScaleFactor = 1       |                      |                          |                                             |                               |                      |

Tue3av400#010.002.001.1r.esp

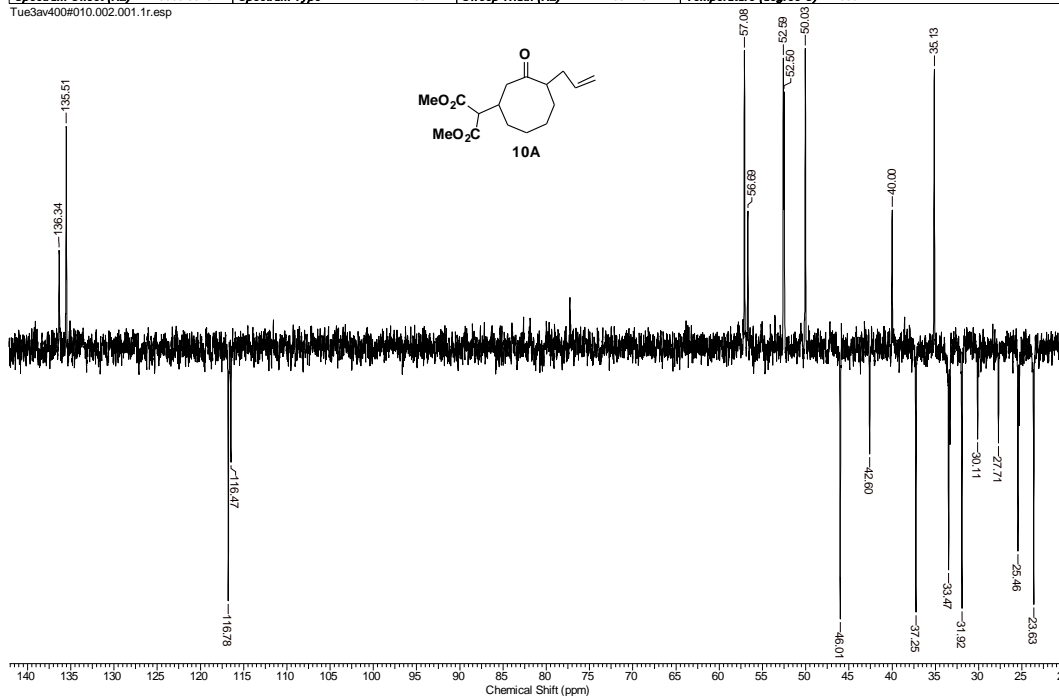

|                               |                      |                          |             |                               |                                              |
|-------------------------------|----------------------|--------------------------|-------------|-------------------------------|----------------------------------------------|
| <b>Acquisition Time (sec)</b> | 2.0447               | <b>Comment</b>           | Priyanka 1H | <b>Date</b>                   | 30 May 2011 09:12:40                         |
| <b>Date Stamp</b>             | 30 May 2011 09:12:40 |                          |             | <b>File Name</b>              | D:\paper-1\DATA\2\Mon5av400#001\1\pdata\111r |
| <b>Frequency (MHz)</b>        | 400.13               | <b>Nucleus</b>           | 1H          | <b>Number of Transients</b>   | 64                                           |
| <b>Original Points Count</b>  | 16384                | <b>Owner</b>             | root        | <b>Points Count</b>           | 32768                                        |
| <b>Receiver Gain</b>          | 161.00               | <b>SW(cyclical) (Hz)</b> | 8012.82     | <b>Solvent</b>                | CHLOROFORM-d                                 |
| <b>Spectrum Offset (Hz)</b>   | 1613.2935            | <b>Spectrum Type</b>     | STANDARD    | <b>Sweep Width (Hz)</b>       | 8012.58                                      |
|                               |                      |                          |             | <b>Temperature (degree C)</b> | 21.500                                       |

Mon5av400#001.001.001.1r.esp

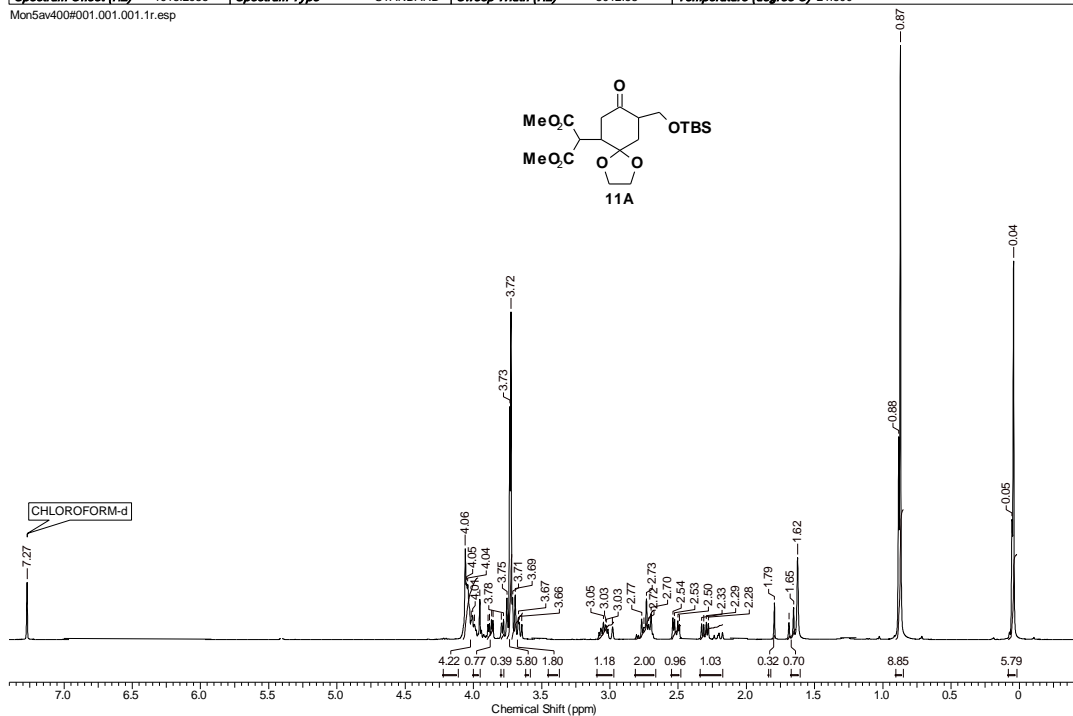

|                               |                      |                          |              |                               |                                              |
|-------------------------------|----------------------|--------------------------|--------------|-------------------------------|----------------------------------------------|
| <b>Acquisition Time (sec)</b> | 0.6488               | <b>Comment</b>           | Priyanka 13C | <b>Date</b>                   | 30 May 2011 10:18:48                         |
| <b>Date Stamp</b>             | 30 May 2011 10:18:48 |                          |              | <b>File Name</b>              | E:\paper-1\DATA\2\Mon5av400#001\3\pdata\111r |
| <b>Frequency (MHz)</b>        | 100.61               | <b>Nucleus</b>           | 13C          | <b>Number of Transients</b>   | 856                                          |
| <b>Original Points Count</b>  | 16384                | <b>Owner</b>             | root         | <b>Points Count</b>           | 32768                                        |
| <b>Receiver Gain</b>          | 2050.00              | <b>SW(cyclical) (Hz)</b> | 25252.53     | <b>Solvent</b>                | CHLOROFORM-d                                 |
| <b>Spectrum Offset (Hz)</b>   | 9069.2266            | <b>Spectrum Type</b>     | STANDARD     | <b>Sweep Width (Hz)</b>       | 25251.75                                     |
|                               |                      |                          |              | <b>Temperature (degree C)</b> | 22.700                                       |

Mon5av400#001.003.001.1r.esp

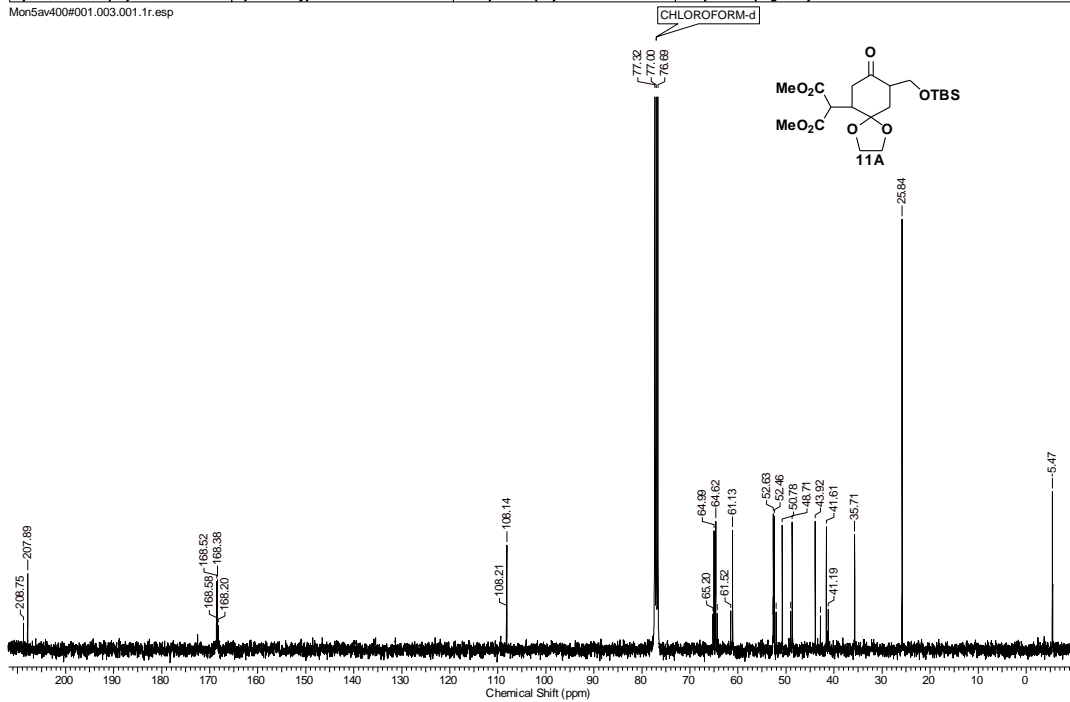

|                        |                      |                   |                                            |                        |                      |
|------------------------|----------------------|-------------------|--------------------------------------------|------------------------|----------------------|
| Acquisition Time (sec) | 0.6816               | Comment           | Priyanka Dept                              | Date                   | 30 May 2011 09:19:04 |
| Date Stamp             | 30 May 2011 09:19:04 | File Name         | E:\paper-1\DATA\2\Mon5av400#0012\pdata111r | Origin                 | spect                |
| Frequency (MHz)        | 100.61               | Nucleus           | 13C                                        | Number of Transients   | 1114                 |
| Original Points Count  | 16384                | Owner             | root                                       | Points Count           | 32768                |
| Receiver Gain          | 16384.00             | SW(cyclical) (Hz) | 24038.46                                   | Pulse Sequence         | dept135              |
| Spectrum Offset (Hz)   | 10060.3320           | Spectrum Type     | DEPT135                                    | Solvent                | CHLOROFORM-d         |
|                        |                      |                   |                                            | Sweep Width (Hz)       | 24037.73             |
|                        |                      |                   |                                            | Temperature (degree C) | 21.700               |

VerticalScaleFactor = 1  
 Mon5av400#001.002.001.1r.esp

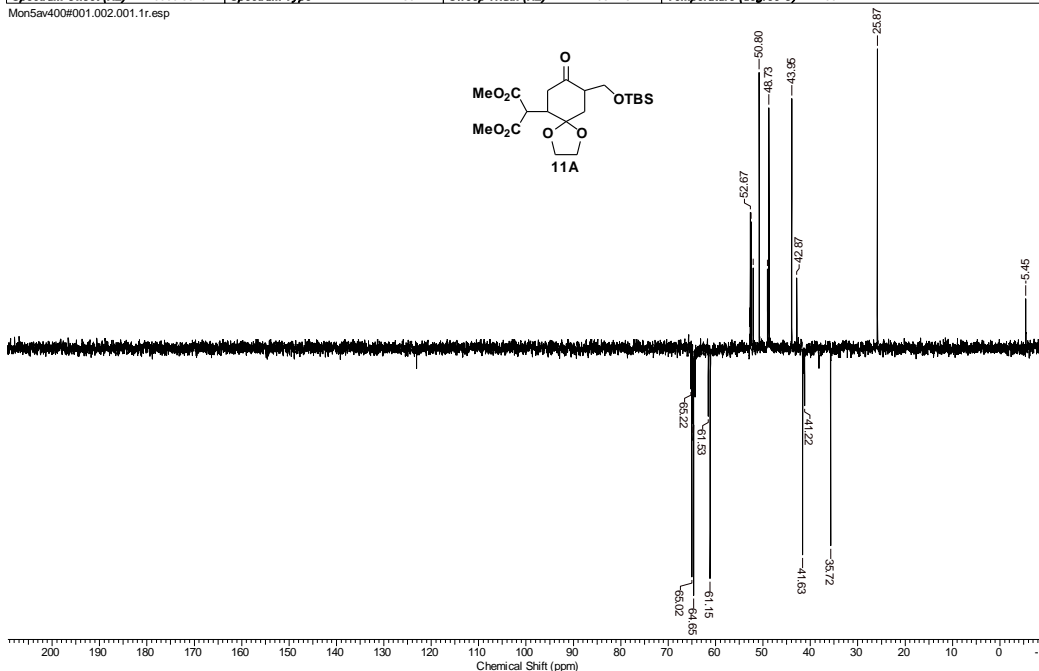

|                        |                      |                   |                                            |                        |                      |
|------------------------|----------------------|-------------------|--------------------------------------------|------------------------|----------------------|
| Acquisition Time (sec) | 2.0447               | Comment           | Priyanka 1H                                | Date                   | 12 May 2011 13:43:36 |
| Date Stamp             | 12 May 2011 13:43:36 | File Name         | E:\paper-1\DATA\3\Thu2av400#005\1pdata111r | Origin                 | spect                |
| Frequency (MHz)        | 400.13               | Nucleus           | 1H                                         | Number of Transients   | 64                   |
| Original Points Count  | 16384                | Owner             | root                                       | Points Count           | 32768                |
| Receiver Gain          | 144.00               | SW(cyclical) (Hz) | 8012.82                                    | Pulse Sequence         | zg30                 |
| Spectrum Offset (Hz)   | 2795.3604            | Spectrum Type     | STANDARD                                   | Solvent                | CHLOROFORM-d         |
|                        |                      |                   |                                            | Sweep Width (Hz)       | 8012.58              |
|                        |                      |                   |                                            | Temperature (degree C) | 20.000               |

VerticalScaleFactor = 1  
 Thu2av400#005.001.001.1r.esp

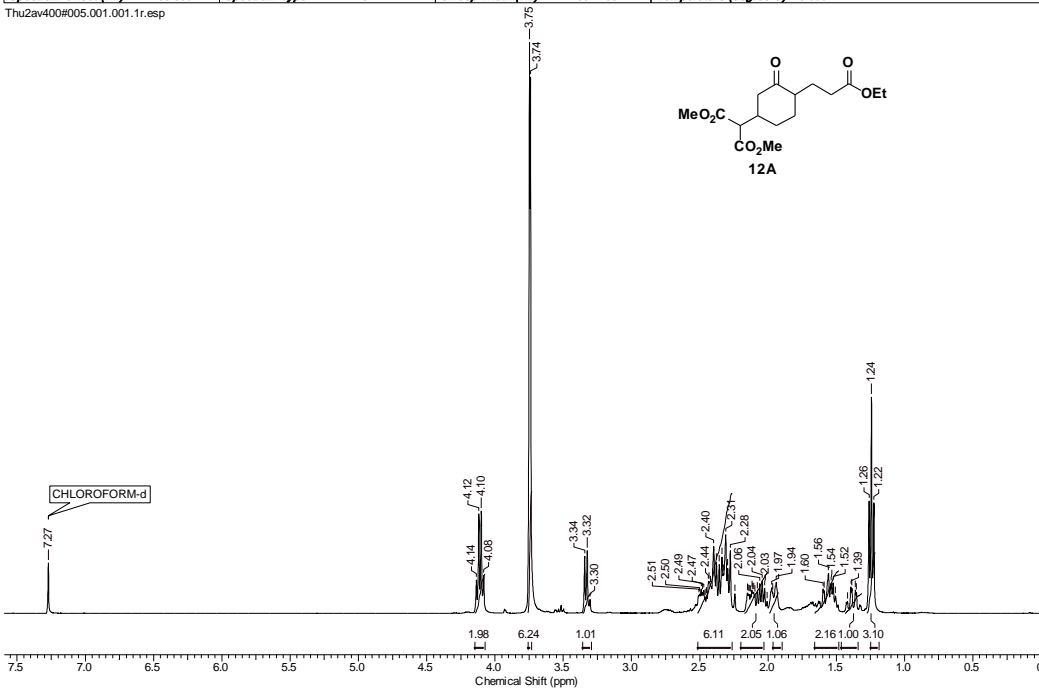

|                               |                      |                          |                                             |                               |                      |
|-------------------------------|----------------------|--------------------------|---------------------------------------------|-------------------------------|----------------------|
| <b>Acquisition Time (sec)</b> | 0.6816               | <b>Comment</b>           | Priyanka 13C                                | <b>Date</b>                   | 12 May 2011 15:26:00 |
| <b>Date Stamp</b>             | 12 May 2011 15:26:00 | <b>File Name</b>         | D:\paper-1\DATA\3\Thu2av400#005\3\data\111r | <b>Origin</b>                 | spect                |
| <b>Frequency (MHz)</b>        | 100.61               | <b>Nucleus</b>           | 13C                                         | <b>Number of Transients</b>   | 195                  |
| <b>Original Points Count</b>  | 16384                | <b>Owner</b>             | root                                        | <b>Points Count</b>           | 32768                |
| <b>Receiver Gain</b>          | 2050.00              | <b>SW(cyclical) (Hz)</b> | 24038.46                                    | <b>Solvent</b>                | CHLOROFORM-d         |
| <b>Spectrum Offset (Hz)</b>   | 10055.4414           | <b>Spectrum Type</b>     | STANDARD                                    | <b>Sweep Width (Hz)</b>       | 24037.73             |
|                               |                      |                          |                                             | <b>Temperature (degree C)</b> | 20.400               |

Thu2av400#005.003.001.1r.esp

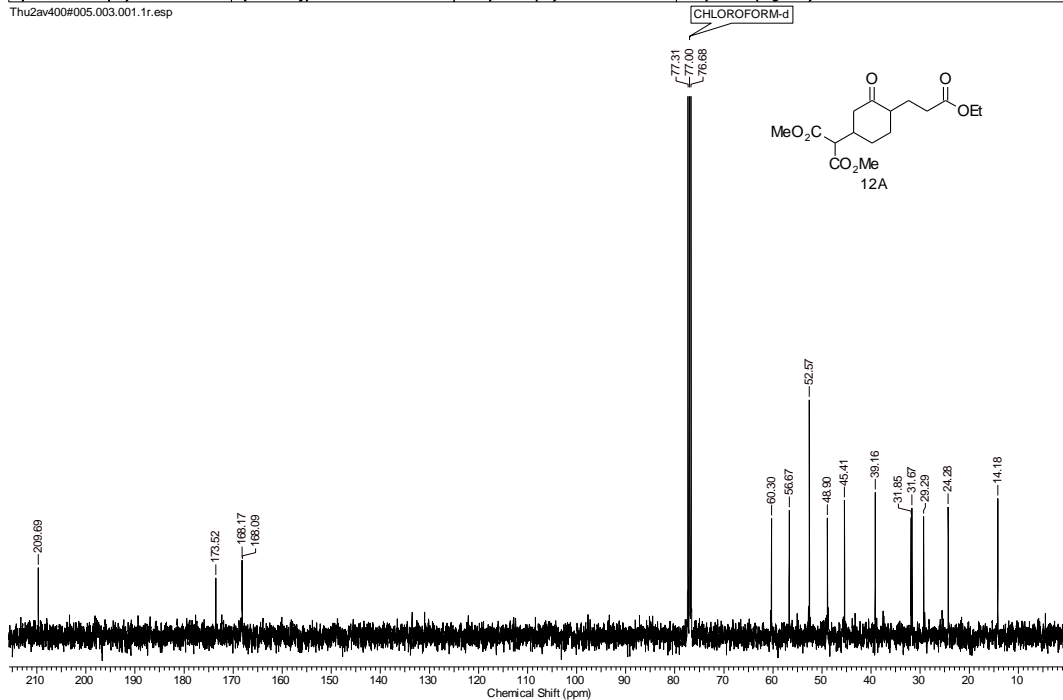

|                               |                      |                          |                                             |                               |                      |
|-------------------------------|----------------------|--------------------------|---------------------------------------------|-------------------------------|----------------------|
| <b>Acquisition Time (sec)</b> | 0.6816               | <b>Comment</b>           | Priyanka Dept                               | <b>Date</b>                   | 12 May 2011 13:47:52 |
| <b>Date Stamp</b>             | 12 May 2011 13:47:52 | <b>File Name</b>         | E:\paper-1\DATA\3\Thu2av400#005\2\data\111r | <b>Origin</b>                 | spect                |
| <b>Frequency (MHz)</b>        | 100.61               | <b>Nucleus</b>           | 13C                                         | <b>Number of Transients</b>   | 697                  |
| <b>Original Points Count</b>  | 16384                | <b>Owner</b>             | root                                        | <b>Points Count</b>           | 32768                |
| <b>Receiver Gain</b>          | 16384.00             | <b>SW(cyclical) (Hz)</b> | 24038.46                                    | <b>Solvent</b>                | CHLOROFORM-d         |
| <b>Spectrum Offset (Hz)</b>   | 10060.3320           | <b>Spectrum Type</b>     | DEPT135                                     | <b>Sweep Width (Hz)</b>       | 24037.73             |
|                               |                      |                          |                                             | <b>Temperature (degree C)</b> | 20.100               |

Thu2av400#005.002.001.1r.esp

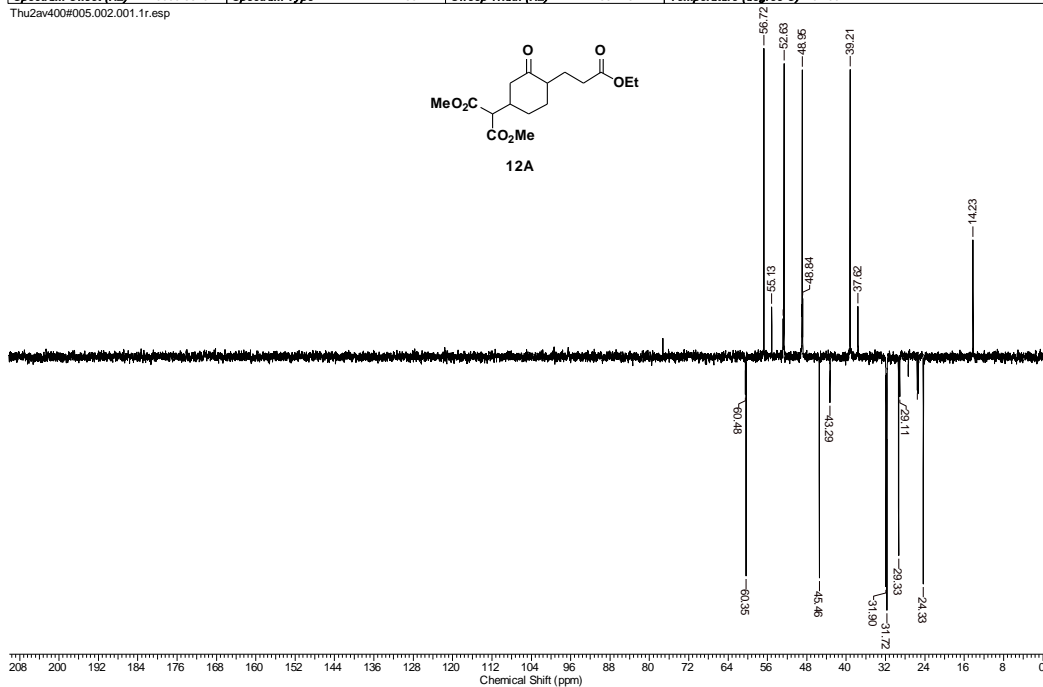

|                               |                      |                          |                                             |                               |                      |
|-------------------------------|----------------------|--------------------------|---------------------------------------------|-------------------------------|----------------------|
| <b>Acquisition Time (sec)</b> | 1.9923               | <b>Comment</b>           | Priyanka 1H/CDCB                            | <b>Date</b>                   | 02 Jul 2011 15:32:24 |
| <b>Date Stamp</b>             | 02 Jul 2011 15:32:24 | <b>File Name</b>         | D:\paper-1\DATA\4\Sat1av400#008\1\pdata\11r | <b>Number of Transients</b>   | 32                   |
| <b>Frequency (MHz)</b>        | 400.13               | <b>Nucleus</b>           | 1H                                          | <b>Points Count</b>           | 32768                |
| <b>Original Points Count</b>  | 16384                | <b>Owner</b>             | Administrator                               | <b>Pulse Sequence</b>         | zg30                 |
| <b>Receiver Gain</b>          | 181.00               | <b>SW(cyclical) (Hz)</b> | 8223.68                                     | <b>Solvent</b>                | CHLOROFORM-d         |
| <b>Spectrum Offset (Hz)</b>   | 2465.3613            | <b>Spectrum Type</b>     | STANDARD                                    | <b>Sweep Width (Hz)</b>       | 8223.43              |
|                               |                      |                          |                                             | <b>Temperature (degree C)</b> | 24.000               |

Sat1av400#008.001.001.1r.esp

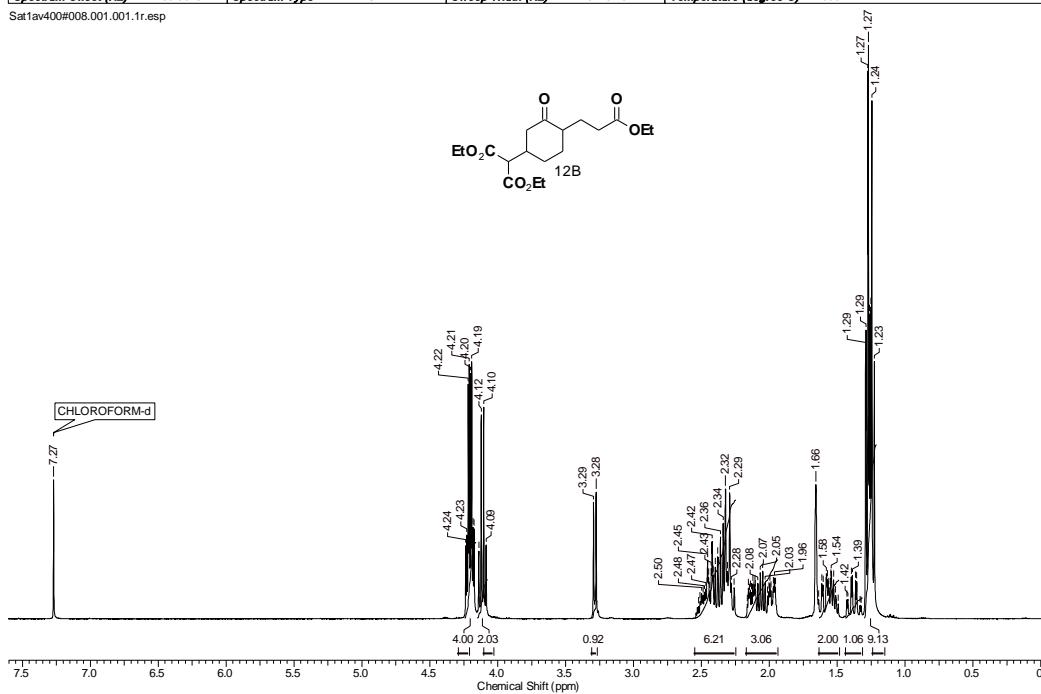

|                               |                      |                          |                                             |                               |                      |
|-------------------------------|----------------------|--------------------------|---------------------------------------------|-------------------------------|----------------------|
| <b>Acquisition Time (sec)</b> | 0.6488               | <b>Comment</b>           | 13C                                         | <b>Date</b>                   | 02 Jul 2011 16:53:28 |
| <b>Date Stamp</b>             | 02 Jul 2011 16:53:28 | <b>File Name</b>         | D:\paper-1\DATA\4\Sat1av400#008\3\pdata\11r | <b>Number of Transients</b>   | 826                  |
| <b>Frequency (MHz)</b>        | 100.61               | <b>Nucleus</b>           | 13C                                         | <b>Points Count</b>           | 32768                |
| <b>Original Points Count</b>  | 16384                | <b>Owner</b>             | root                                        | <b>Pulse Sequence</b>         | zgpg30               |
| <b>Receiver Gain</b>          | 912.00               | <b>SW(cyclical) (Hz)</b> | 25252.53                                    | <b>Solvent</b>                | CHLOROFORM-d         |
| <b>Spectrum Offset (Hz)</b>   | 9555.5049            | <b>Spectrum Type</b>     | STANDARD                                    | <b>Sweep Width (Hz)</b>       | 25251.75             |
|                               |                      |                          |                                             | <b>Temperature (degree C)</b> | 24.600               |

Sat1av400#008.003.001.1r.esp

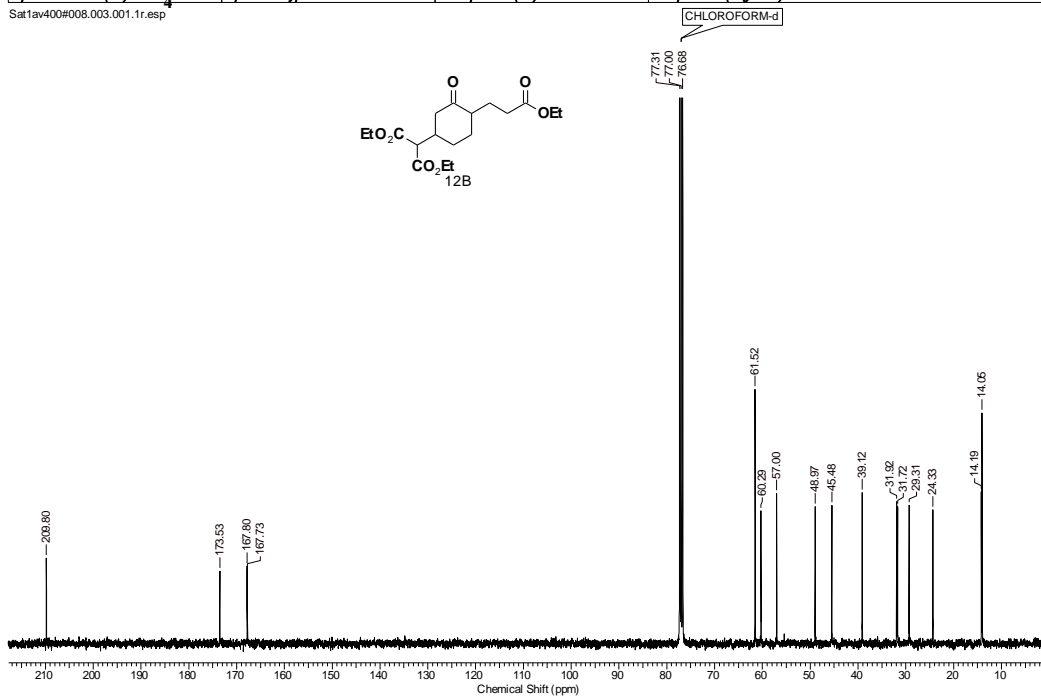



|                         |                      |                   |                                            |                      |                        |        |
|-------------------------|----------------------|-------------------|--------------------------------------------|----------------------|------------------------|--------|
| Acquisition Time (sec)  | 0.6816               | Comment           | Dept/CDCI3                                 | Date                 | 02 Jul 2011 15:45:12   |        |
| Date Stamp              | 02 Jul 2011 15:45:12 | File Name         | E:\paper-1\DATA\1\Sat1av400#008\2\data111r |                      |                        |        |
| Frequency (MHz)         | 100.61               | Nucleus           | 13C                                        | Number of Transients | 1200                   |        |
| Original Points Count   | 16384                | Owner             | root                                       | Points Count         | 32768                  |        |
| Receiver Gain           | 16384.00             | SW(cyclical) (Hz) | 24038.46                                   | Solvent              | CHLOROFORM-d           |        |
| Spectrum Offset (Hz)    | 10060.3320           | Spectrum Type     | DEPT135                                    | Sweep Width (Hz)     | 24037.73               |        |
|                         |                      |                   |                                            |                      | Temperature (degree C) | 24.300 |
| VerticalScaleFactor = 1 |                      |                   |                                            |                      |                        |        |

Sat1av400#008.002.001.1r.esp

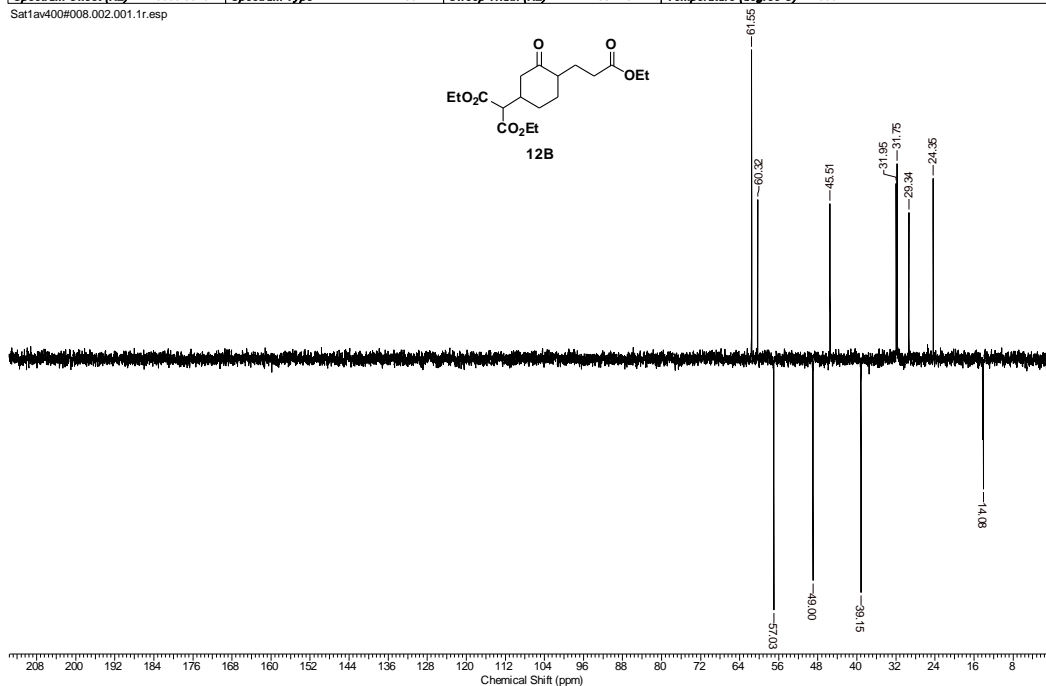

|                         |                      |                   |                                            |                      |                        |        |
|-------------------------|----------------------|-------------------|--------------------------------------------|----------------------|------------------------|--------|
| Acquisition Time (sec)  | 1.9923               | Comment           | Priyanka 1H/ CDCI3                         | Date                 | 02 Jul 2011 09:06:16   |        |
| Date Stamp              | 02 Jul 2011 09:06:16 | File Name         | E:\paper-1\DATA\6\Sat1av400#003\1\data111r |                      |                        |        |
| Frequency (MHz)         | 400.13               | Nucleus           | 1H                                         | Number of Transients | 64                     |        |
| Original Points Count   | 16384                | Owner             | Administrator                              | Points Count         | 32768                  |        |
| Receiver Gain           | 181.00               | SW(cyclical) (Hz) | 8223.68                                    | Solvent              | CHLOROFORM-d           |        |
| Spectrum Offset (Hz)    | 2465.1101            | Spectrum Type     | STANDARD                                   | Sweep Width (Hz)     | 8223.43                |        |
|                         |                      |                   |                                            |                      | Temperature (degree C) | 25.000 |
| VerticalScaleFactor = 1 |                      |                   |                                            |                      |                        |        |

Sat1av400#003.001.001.1r.esp

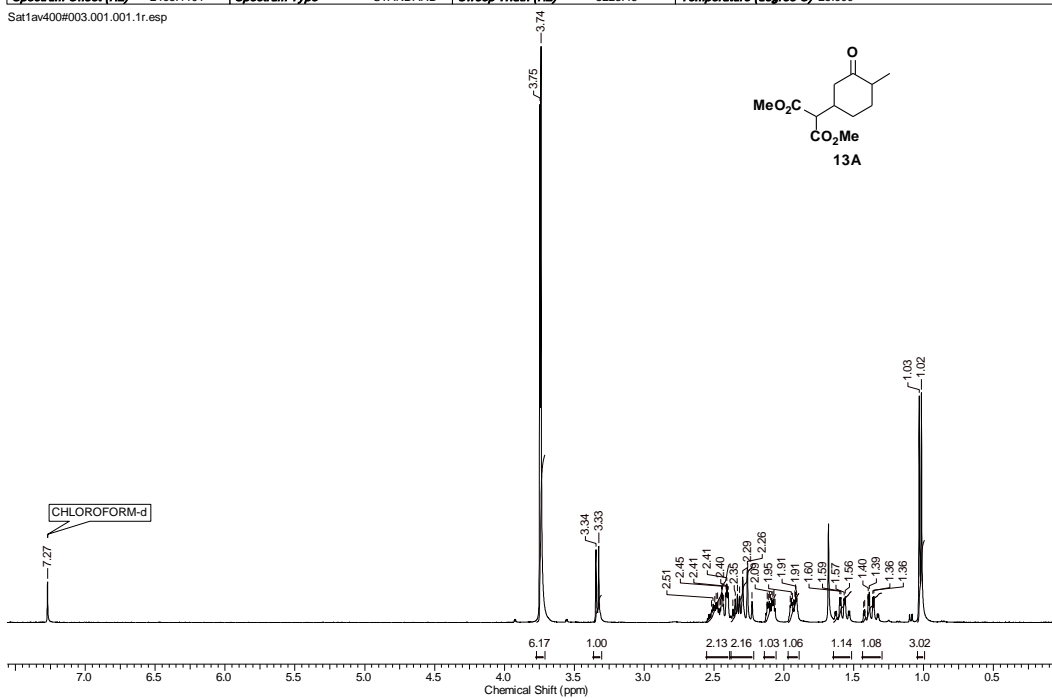

|                               |                      |                          |                                            |                               |                      |
|-------------------------------|----------------------|--------------------------|--------------------------------------------|-------------------------------|----------------------|
| <b>Acquisition Time (sec)</b> | 0.6488               | <b>Comment</b>           | 13C                                        | <b>Date</b>                   | 02 Jul 2011 10:03:52 |
| <b>Date Stamp</b>             | 02 Jul 2011 10:03:52 | <b>File Name</b>         | D:\paper-1\DATA\6\Sat1av400#003\3\data111r |                               |                      |
| <b>Frequency (MHz)</b>        | 100.61               | <b>Nucleus</b>           | 13C                                        | <b>Number of Transients</b>   | 1436                 |
| <b>Original Points Count</b>  | 16384                | <b>Owner</b>             | root                                       | <b>Points Count</b>           | 32768                |
| <b>Receiver Gain</b>          | 912.00               | <b>SW(cyclical) (Hz)</b> | 25252.53                                   | <b>Solvent</b>                | CHLOROFORM-d         |
| <b>Spectrum Offset (Hz)</b>   | 9555.5049            | <b>Spectrum Type</b>     | STANDARD                                   | <b>Sweep Width (Hz)</b>       | 25251.75             |
|                               |                      |                          |                                            | <b>Temperature (degree C)</b> | 25.000               |

Sat1av400#003.003.001.1r.esp

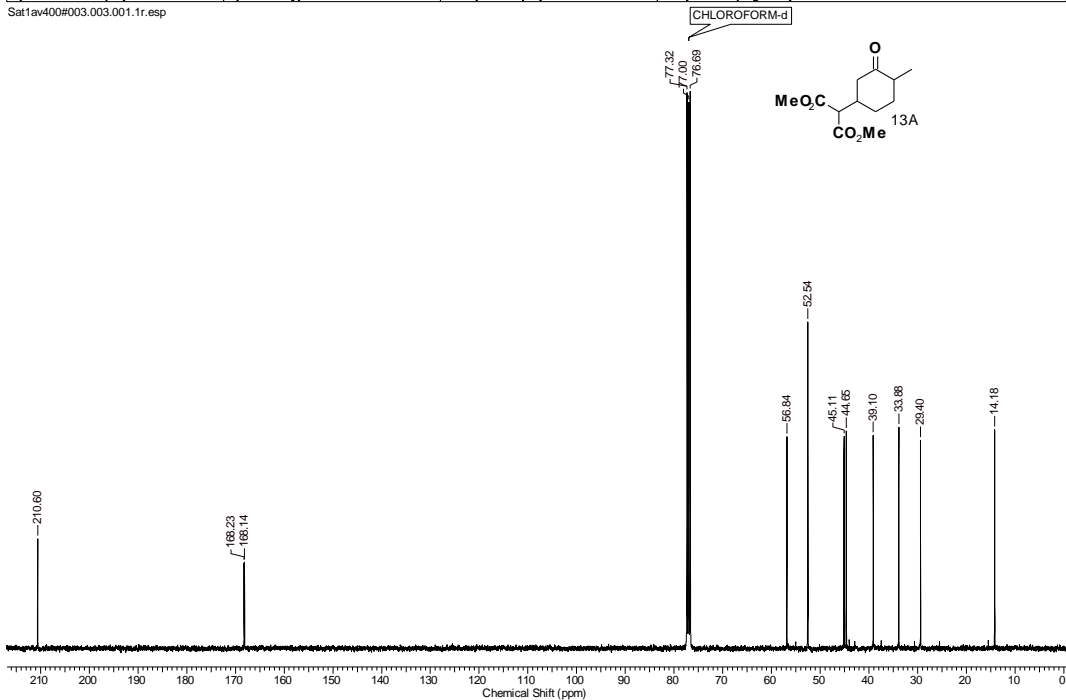

|                               |                      |                          |                                            |                               |                      |
|-------------------------------|----------------------|--------------------------|--------------------------------------------|-------------------------------|----------------------|
| <b>Acquisition Time (sec)</b> | 0.6816               | <b>Comment</b>           | Dept/CDC13                                 | <b>Date</b>                   | 02 Jul 2011 09:16:56 |
| <b>Date Stamp</b>             | 02 Jul 2011 09:16:56 | <b>File Name</b>         | E:\paper-1\DATA\6\Sat1av400#003\2\data111r |                               |                      |
| <b>Frequency (MHz)</b>        | 100.61               | <b>Nucleus</b>           | 13C                                        | <b>Number of Transients</b>   | 239                  |
| <b>Original Points Count</b>  | 16384                | <b>Owner</b>             | root                                       | <b>Points Count</b>           | 32768                |
| <b>Receiver Gain</b>          | 16384.00             | <b>SW(cyclical) (Hz)</b> | 24038.46                                   | <b>Solvent</b>                | CHLOROFORM-d         |
| <b>Spectrum Offset (Hz)</b>   | 10060.3320           | <b>Spectrum Type</b>     | DEPT135                                    | <b>Sweep Width (Hz)</b>       | 24037.73             |
|                               |                      |                          |                                            | <b>Temperature (degree C)</b> | 25.000               |
|                               |                      |                          |                                            | <b>VerticalScaleFactor</b>    | = 1                  |

Sat1av400#003.002.001.1r.esp

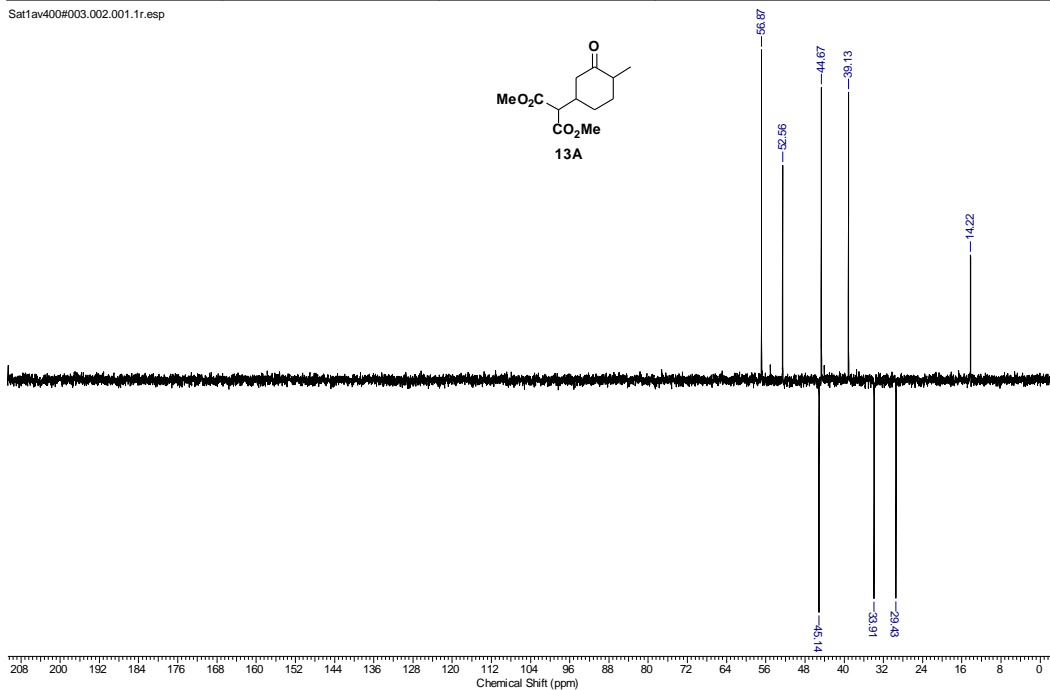

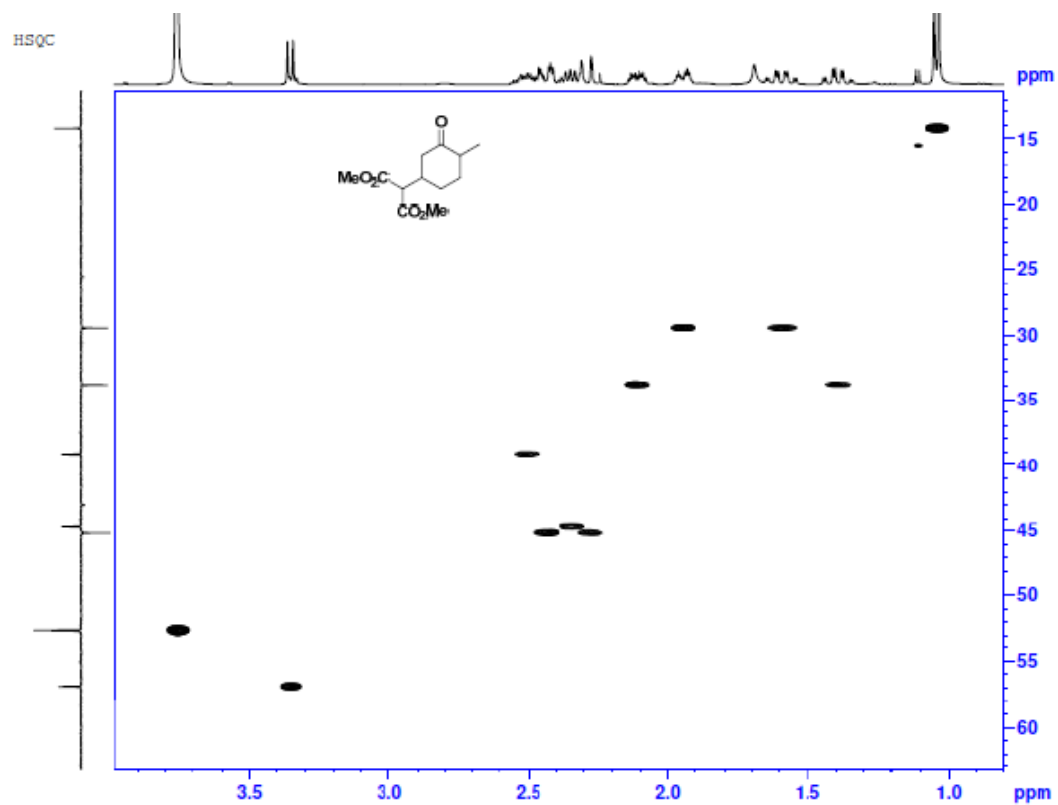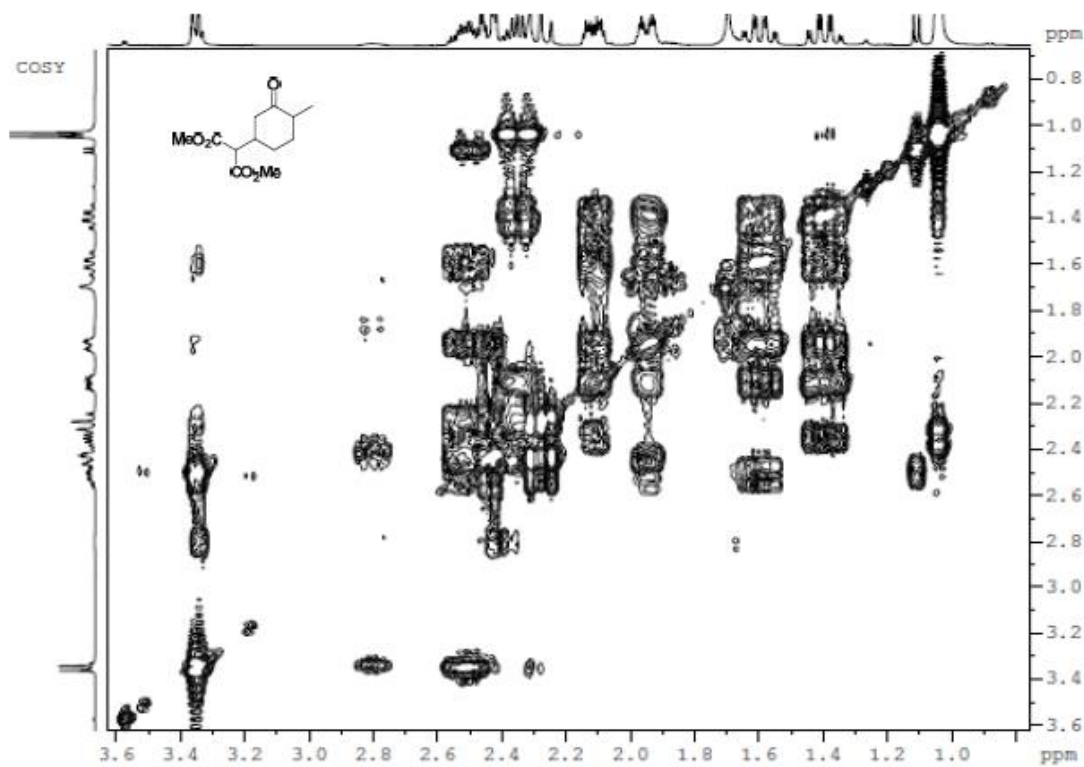

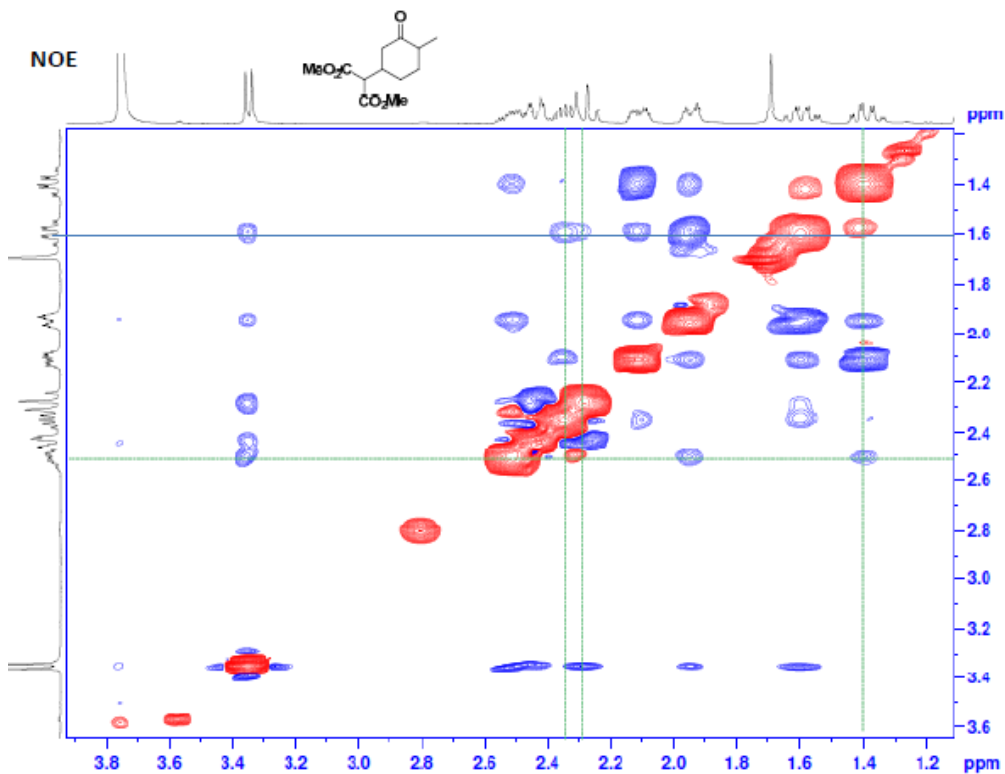

|                               |                      |                          |                                             |                               |                      |
|-------------------------------|----------------------|--------------------------|---------------------------------------------|-------------------------------|----------------------|
| <b>Acquisition Time (sec)</b> | 1.9923               | <b>Comment</b>           | Priyanka 1H                                 | <b>Date</b>                   | 25 Aug 2011 14:49:44 |
| <b>Date Stamp</b>             | 25 Aug 2011 14:49:44 | <b>File Name</b>         | E:\paper-1\DATA\7\TueSav400#010\1\data\1\1r |                               |                      |
| <b>Frequency (MHz)</b>        | 400.13               | <b>Nucleus</b>           | 1H                                          | <b>Number of Transients</b>   | 64                   |
| <b>Original Points Count</b>  | 16384                | <b>Owner</b>             | Administrator                               | <b>Points Count</b>           | 32768                |
| <b>Receiver Gain</b>          | 203.00               | <b>SW(cyclical) (Hz)</b> | 8223.68                                     | <b>Solvent</b>                | CHLOROFORM-d         |
| <b>Spectrum Offset (Hz)</b>   | 2465.3613            | <b>Spectrum Type</b>     | STANDARD                                    | <b>Sweep Width (Hz)</b>       | 8223.43              |
|                               |                      |                          |                                             | <b>Temperature (degree C)</b> | 22.900               |

TueSav400#010.001.1r.esp VerticalScaleFactor = 1

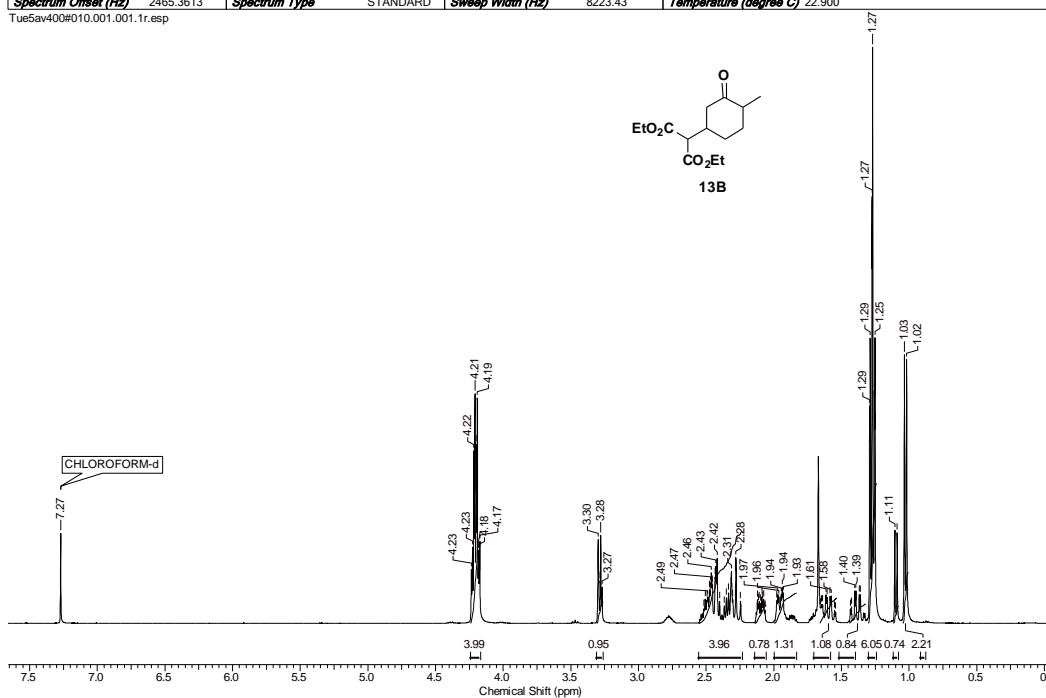

|                               |                      |                          |          |                               |                                             |
|-------------------------------|----------------------|--------------------------|----------|-------------------------------|---------------------------------------------|
| <b>Acquisition Time (sec)</b> | 0.6488               | <b>Comment</b>           | 13C      | <b>Date</b>                   | 31 Aug 2011 08:53:28                        |
| <b>Date Stamp</b>             | 31 Aug 2011 08:53:28 | <b>File Name</b>         |          | <b>File Name</b>              | D:\paper-1\DATA\7\TueSav400#010\3\pdata\11r |
| <b>Frequency (MHz)</b>        | 100.61               | <b>Nucleus</b>           | 13C      | <b>Number of Transients</b>   | 13074                                       |
| <b>Original Points Count</b>  | 16384                | <b>Owner</b>             | root     | <b>Points Count</b>           | 32768                                       |
| <b>Receiver Gain</b>          | 912.00               | <b>SW(cyclical) (Hz)</b> | 25252.53 | <b>Solvent</b>                | CHLOROFORM-d                                |
| <b>Spectrum Offset (Hz)</b>   | 9556.2744            | <b>Spectrum Type</b>     | STANDARD | <b>Sweep Width (Hz)</b>       | 25251.75                                    |
|                               |                      |                          |          | <b>Temperature (degree C)</b> | 24.300                                      |

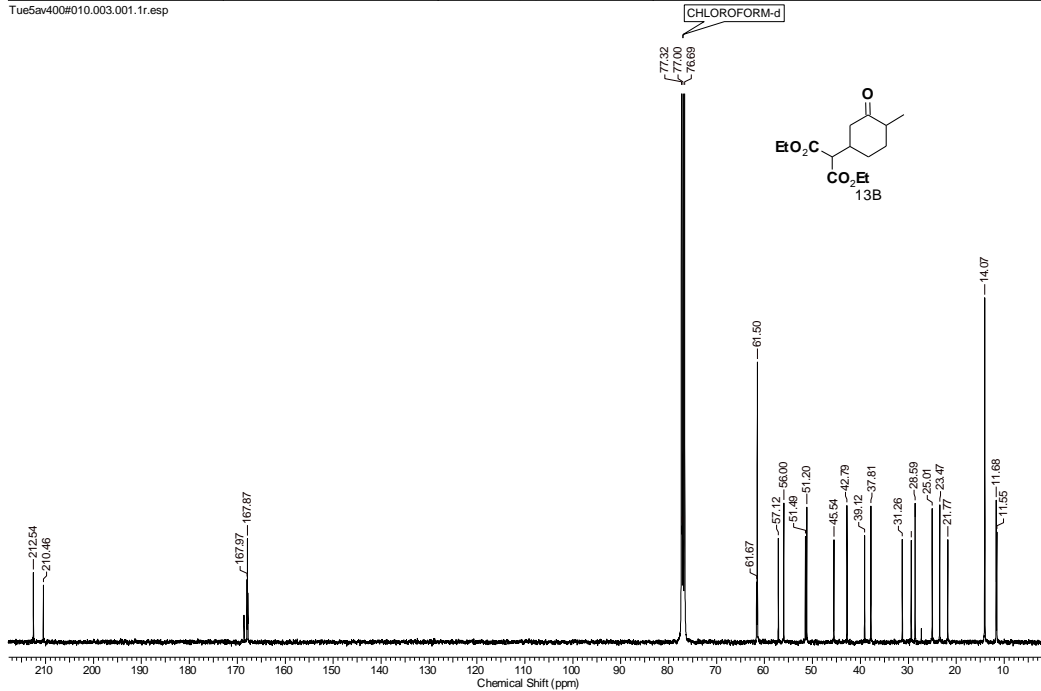

|                               |                      |                          |          |                               |                                             |
|-------------------------------|----------------------|--------------------------|----------|-------------------------------|---------------------------------------------|
| <b>Acquisition Time (sec)</b> | 0.6816               | <b>Comment</b>           | DEPT     | <b>Date</b>                   | 30 Aug 2011 23:08:56                        |
| <b>Date Stamp</b>             | 30 Aug 2011 23:08:56 | <b>File Name</b>         |          | <b>File Name</b>              | E:\paper-1\DATA\7\TueSav400#010\2\pdata\11r |
| <b>Frequency (MHz)</b>        | 100.61               | <b>Nucleus</b>           | 13C      | <b>Number of Transients</b>   | 4000                                        |
| <b>Original Points Count</b>  | 16384                | <b>Owner</b>             | root     | <b>Points Count</b>           | 32768                                       |
| <b>Receiver Gain</b>          | 16384.00             | <b>SW(cyclical) (Hz)</b> | 24038.46 | <b>Solvent</b>                | CHLOROFORM-d                                |
| <b>Spectrum Offset (Hz)</b>   | 10060.3320           | <b>Spectrum Type</b>     | DEPT135  | <b>Sweep Width (Hz)</b>       | 24037.73                                    |
|                               |                      |                          |          | <b>Temperature (degree C)</b> | 24.100                                      |

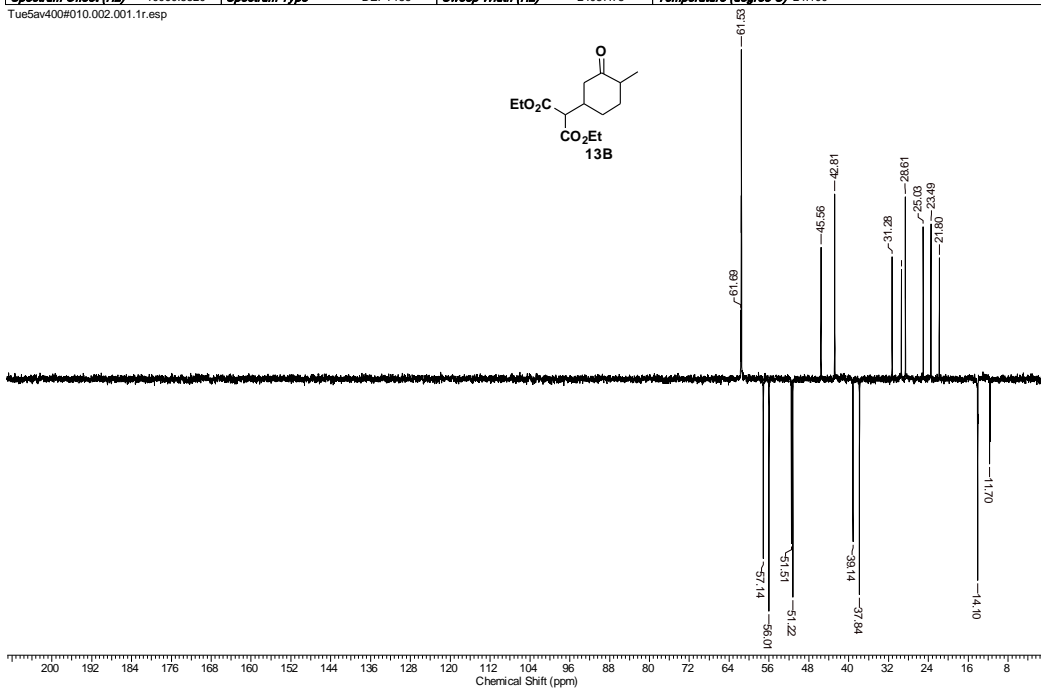

|                               |                      |                             |                                             |                             |                      |                              |          |
|-------------------------------|----------------------|-----------------------------|---------------------------------------------|-----------------------------|----------------------|------------------------------|----------|
| <b>Acquisition Time (sec)</b> | 1.6384               | <b>Comment</b>              | 1H Priyanka                                 | <b>Date</b>                 | 12 Aug 2011 11:25:20 | <b>Frequency (MHz)</b>       | 500.13   |
| <b>Date Stamp</b>             | 12 Aug 2011 11:25:20 | <b>File Name</b>            | D:\paper-1\DATA\8\Fri2av500#001\1\data1\11r | <b>Origin</b>               | spect                | <b>Original Points Count</b> | 16384    |
| <b>Nucleus</b>                | 1H                   | <b>Number of Transients</b> | 64                                          | <b>Receiver Gain</b>        | 912.00               | <b>SW(cyclical) (Hz)</b>     | 10000.00 |
| <b>Points Count</b>           | 32768                | <b>Pulse Sequence</b>       | zg30                                        | <b>Spectrum Offset (Hz)</b> | 3492.9702            | <b>Spectrum Type</b>         | STANDARD |
| <b>Solvent</b>                | CHLOROFORM-d         |                             |                                             |                             |                      | <b>Sweep Width (Hz)</b>      | 9999.70  |

Fri2av500#001.001.001.1r.esp

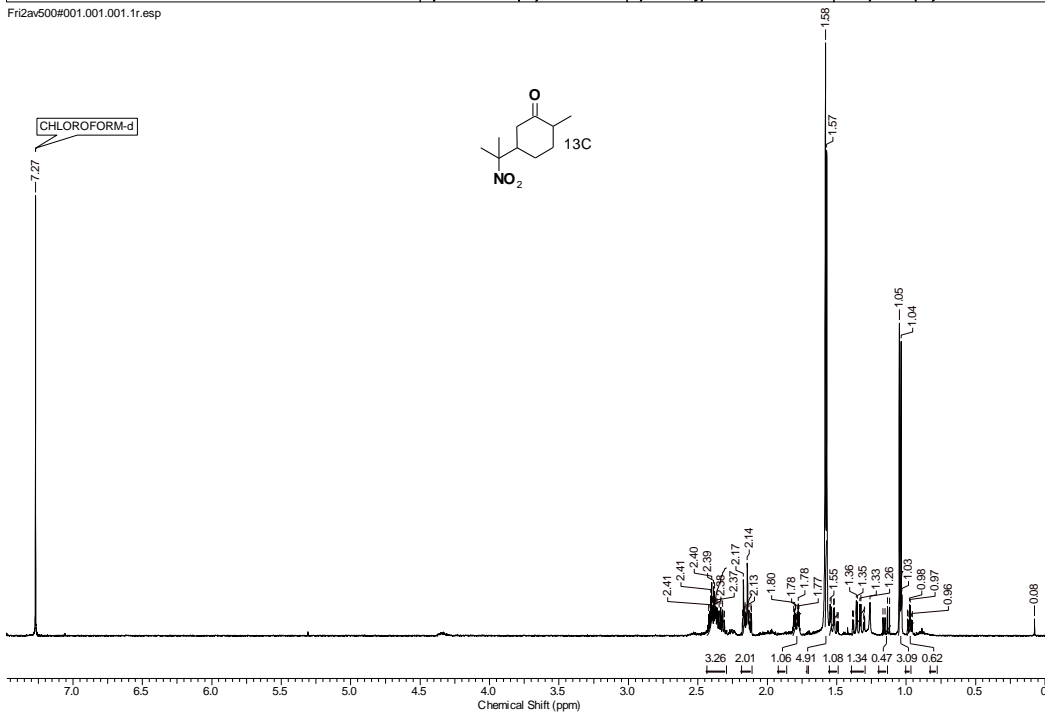

|                               |                      |                             |                                             |                             |                      |                              |          |
|-------------------------------|----------------------|-----------------------------|---------------------------------------------|-----------------------------|----------------------|------------------------------|----------|
| <b>Acquisition Time (sec)</b> | 1.1010               | <b>Comment</b>              | 13C                                         | <b>Date</b>                 | 12 Aug 2011 14:30:56 | <b>Frequency (MHz)</b>       | 125.76   |
| <b>Date Stamp</b>             | 12 Aug 2011 14:30:56 | <b>File Name</b>            | D:\paper-1\DATA\8\Fri2av500#001\3\data1\11r | <b>Origin</b>               | spect                | <b>Original Points Count</b> | 32768    |
| <b>Nucleus</b>                | 13C                  | <b>Number of Transients</b> | 2390                                        | <b>Receiver Gain</b>        | 2050.00              | <b>SW(cyclical) (Hz)</b>     | 29761.90 |
| <b>Points Count</b>           | 32768                | <b>Pulse Sequence</b>       | zgpg                                        | <b>Spectrum Offset (Hz)</b> | 12575.7080           | <b>Spectrum Type</b>         | STANDARD |
| <b>Solvent</b>                | CHLOROFORM-d         |                             |                                             |                             |                      | <b>Sweep Width (Hz)</b>      | 29761.00 |

Fri2av500#001.003.001.1r.esp

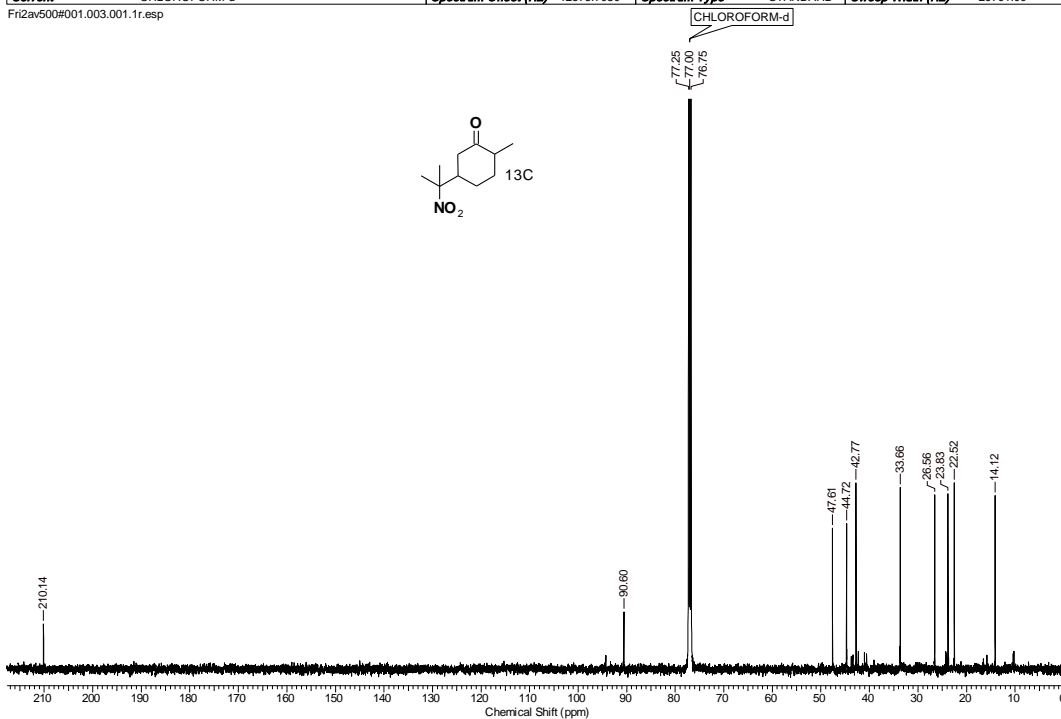

|                               |                      |                             |            |                          |                                           |                              |          |
|-------------------------------|----------------------|-----------------------------|------------|--------------------------|-------------------------------------------|------------------------------|----------|
| <b>Acquisition Time (sec)</b> | 1.1010               | <b>Comment</b>              | DEPT135    | <b>Date</b>              | 12 Aug 2011 11:29:36                      | <b>Frequency (MHz)</b>       | 125.76   |
| <b>Date Stamp</b>             | 12 Aug 2011 11:29:36 | <b>Number of Transients</b> | 1200       | <b>File Name</b>         | E:\paper-1\DATA\8\Fr2av500#001\2\data111r | <b>Owner</b>                 | nmr      |
| <b>Nucleus</b>                | <sup>13</sup> C      | <b>Pulse Sequence</b>       | dept135    | <b>Origin</b>            | spect                                     | <b>Original Points Count</b> | 32768    |
| <b>Points Count</b>           | 32768                | <b>Receiver Gain</b>        | 2050.00    | <b>SW(cyclical) (Hz)</b> | 29761.90                                  | <b>VerticalScaleFactor</b>   | = 1      |
| <b>Solvent</b>                | CHLOROFORM-d         | <b>Spectrum Offset (Hz)</b> | 12575.7842 | <b>Spectrum Type</b>     | DEPT135                                   | <b>Sweep Width (Hz)</b>      | 29761.00 |

Fr2av500#001.002.001.1r.esp

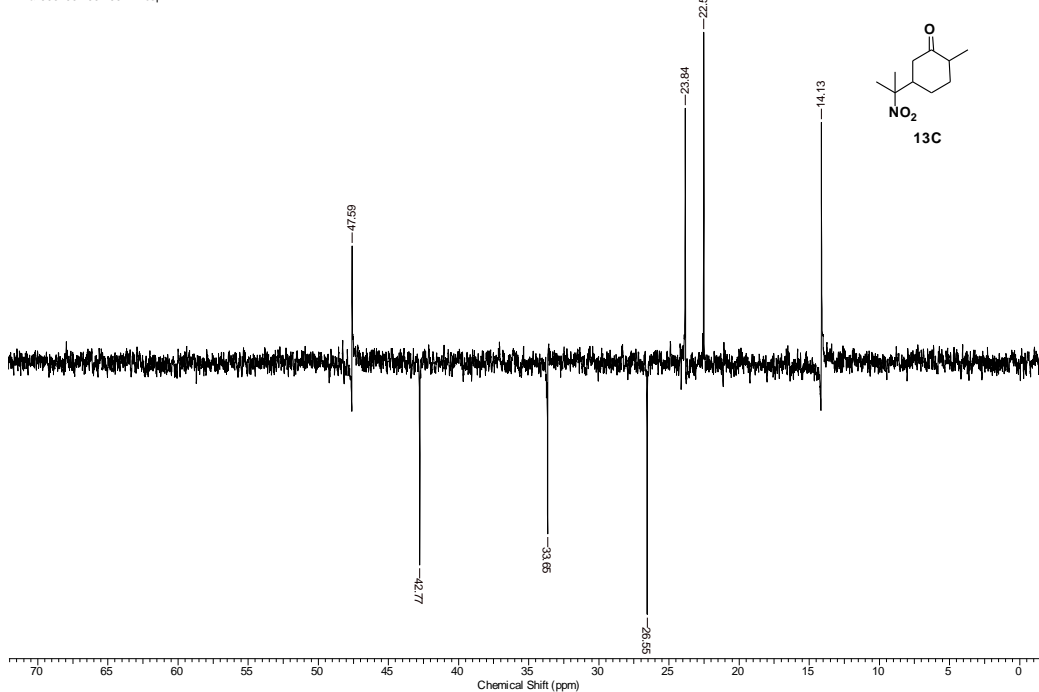

|                               |                      |                             |                |                               |                                             |
|-------------------------------|----------------------|-----------------------------|----------------|-------------------------------|---------------------------------------------|
| <b>Acquisition Time (sec)</b> | 1.9923               | <b>Comment</b>              | Priyanka 1H    | <b>Date</b>                   | 30 Aug 2011 20:05:28                        |
| <b>Date Stamp</b>             | 30 Aug 2011 20:05:28 | <b>Nucleus</b>              | <sup>1</sup> H | <b>File Name</b>              | D:\paper-1\DATA\11\Thu4av400#008\1\data111r |
| <b>Frequency (MHz)</b>        | 400.13               | <b>Number of Transients</b> | 64             | <b>Origin</b>                 | spect                                       |
| <b>Original Points Count</b>  | 16384                | <b>Owner</b>                | Administrator  | <b>Points Count</b>           | 32768                                       |
| <b>Receiver Gain</b>          | 287.00               | <b>SW(cyclical) (Hz)</b>    | 8223.68        | <b>Pulse Sequence</b>         | zg30                                        |
| <b>Spectrum Offset (Hz)</b>   | 2470.9644            | <b>Spectrum Type</b>        | STANDARD       | <b>Solvent</b>                | CHLOROFORM-d                                |
|                               |                      |                             |                | <b>Sweep Width (Hz)</b>       | 8223.43                                     |
|                               |                      |                             |                | <b>Temperature (degree C)</b> | 23.500                                      |

Thu4av400#008.001.001.1r.esp

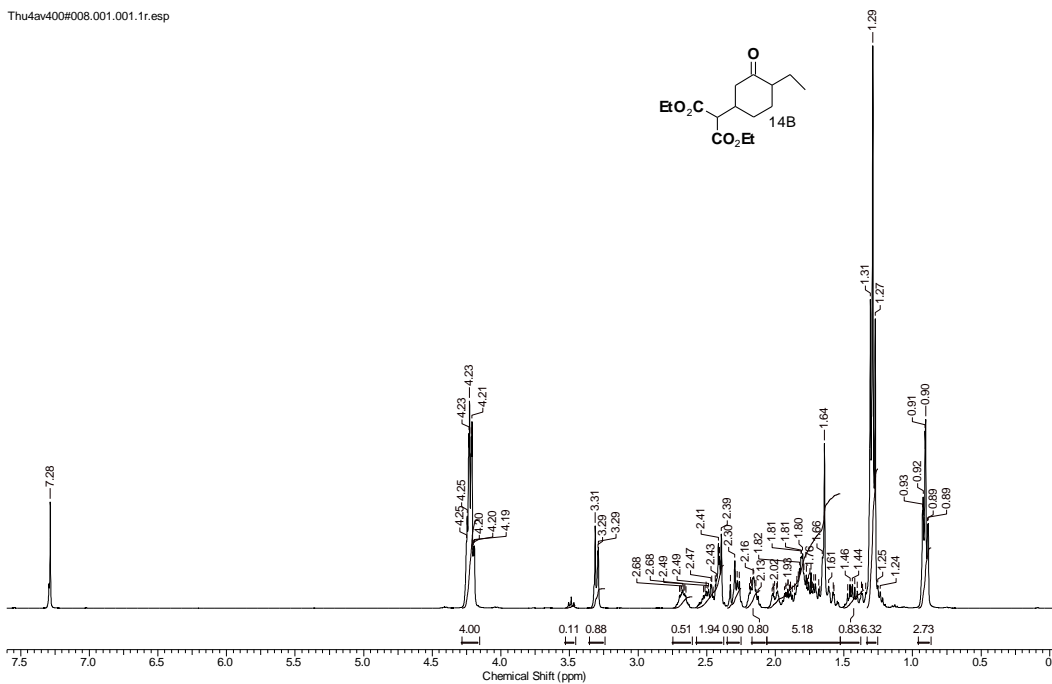

|                               |                      |                          |                                              |                               |                      |
|-------------------------------|----------------------|--------------------------|----------------------------------------------|-------------------------------|----------------------|
| <b>Acquisition Time (sec)</b> | 0.6488               | <b>Comment</b>           | 13C                                          | <b>Date</b>                   | 25 Aug 2011 15:47:20 |
| <b>Date Stamp</b>             | 25 Aug 2011 15:47:20 | <b>File Name</b>         | D:\paper-1\DATA\11\Thu4av400#008\3\pdata\11r |                               |                      |
| <b>Frequency (MHz)</b>        | 100.61               | <b>Nucleus</b>           | 13C                                          | <b>Number of Transients</b>   | 1210                 |
| <b>Original Points Count</b>  | 16384                | <b>Owner</b>             | root                                         | <b>Points Count</b>           | 32768                |
| <b>Receiver Gain</b>          | 912.00               | <b>SW(cyclical) (Hz)</b> | 25252.53                                     | <b>Solvent</b>                | DMSO-d6              |
| <b>Spectrum Type</b>          | STANDARD             | <b>Sweep Width (Hz)</b>  | 25251.75                                     | <b>Temperature (degree C)</b> | 23.600               |
|                               |                      |                          |                                              | <b>Pulse Sequence</b>         | zgpg30               |
|                               |                      |                          |                                              | <b>Spectrum Offset (Hz)</b>   | 9555.5049            |

Thu4av400#008.003.001.1r.esp

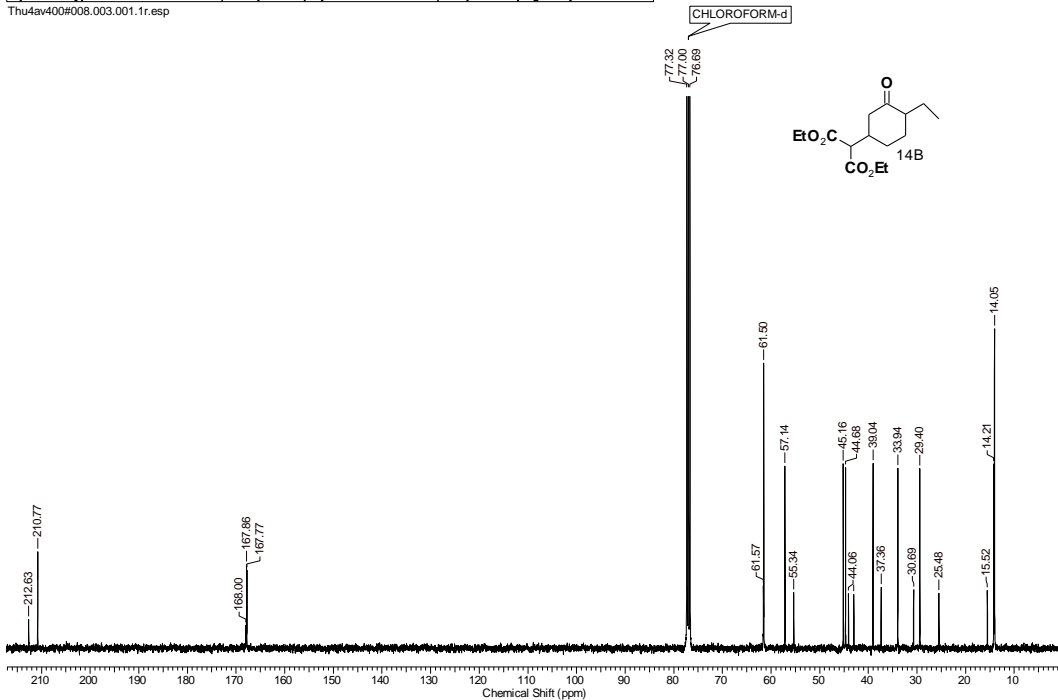

|                               |                      |                          |                                              |                               |                      |
|-------------------------------|----------------------|--------------------------|----------------------------------------------|-------------------------------|----------------------|
| <b>Acquisition Time (sec)</b> | 0.6816               | <b>Comment</b>           | DEPT                                         | <b>Date</b>                   | 25 Aug 2011 14:54:00 |
| <b>Date Stamp</b>             | 25 Aug 2011 14:54:00 | <b>File Name</b>         | E:\paper-1\DATA\11\Thu4av400#008\2\pdata\11r |                               |                      |
| <b>Frequency (MHz)</b>        | 100.61               | <b>Nucleus</b>           | 13C                                          | <b>Number of Transients</b>   | 1200                 |
| <b>Original Points Count</b>  | 16384                | <b>Owner</b>             | root                                         | <b>Points Count</b>           | 32768                |
| <b>Receiver Gain</b>          | 16384.00             | <b>SW(cyclical) (Hz)</b> | 24038.46                                     | <b>Solvent</b>                | CHLOROFORM-d         |
| <b>Spectrum Offset (Hz)</b>   | 10036.3682           | <b>Spectrum Type</b>     | DEPT135                                      | <b>Sweep Width (Hz)</b>       | 24037.73             |
|                               |                      |                          |                                              | <b>Temperature (degree C)</b> | 23.300               |
|                               |                      |                          |                                              | <b>VerticalScaleFactor</b>    | = 1                  |

Thu4av400#008.002.001.1r.esp

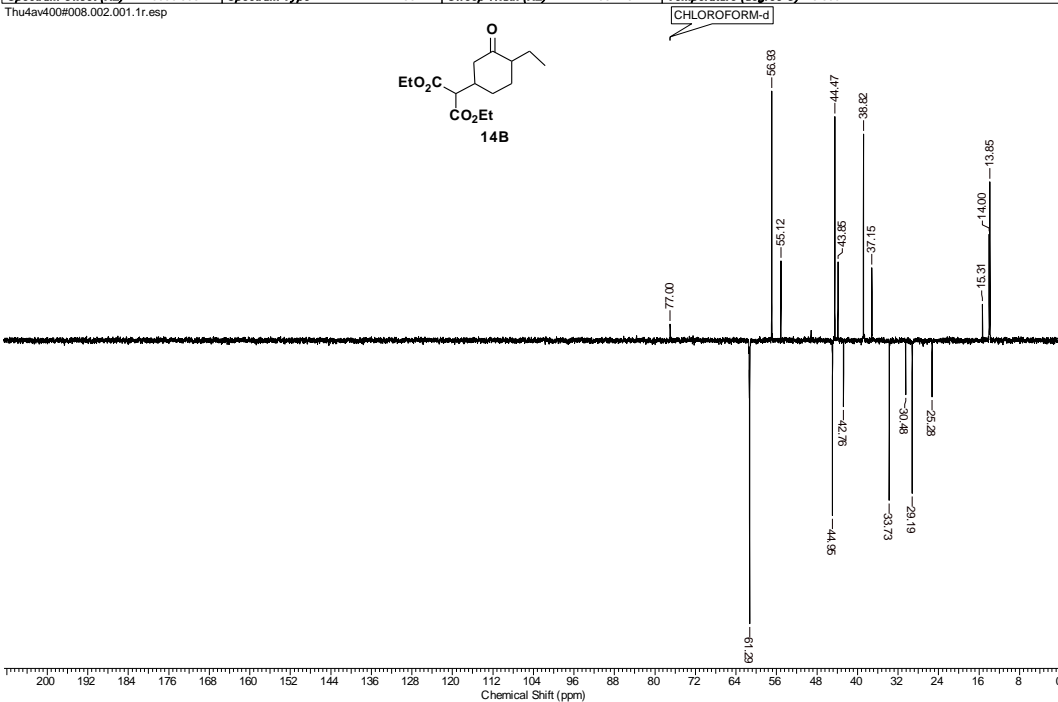



|                               |                      |                          |                                              |                               |                      |
|-------------------------------|----------------------|--------------------------|----------------------------------------------|-------------------------------|----------------------|
| <b>Acquisition Time (sec)</b> | 1.9923               | <b>Comment</b>           | Priyanka 1H/CDCL3                            | <b>Date</b>                   | 26 Aug 2011 19:59:04 |
| <b>Date Stamp</b>             | 26 Aug 2011 19:59:04 | <b>File Name</b>         | D:\paper-1\DATA\15\Fri4av400#019\1\data\111r | <b>Origin</b>                 | spect                |
| <b>Frequency (MHz)</b>        | 400.13               | <b>Nucleus</b>           | 1H                                           | <b>Number of Transients</b>   | 64                   |
| <b>Original Points Count</b>  | 16384                | <b>Owner</b>             | Administrator                                | <b>Points Count</b>           | 32768                |
| <b>Receiver Gain</b>          | 256.00               | <b>SW(cyclical) (Hz)</b> | 8223.68                                      | <b>Pulse Sequence</b>         | zg30                 |
| <b>Spectrum Offset (Hz)</b>   | 2465.3613            | <b>Spectrum Type</b>     | STANDARD                                     | <b>Solvent</b>                | CHLOROFORM-d         |
|                               |                      |                          |                                              | <b>Sweep Width (Hz)</b>       | 8223.43              |
|                               |                      |                          |                                              | <b>Temperature (degree C)</b> | 23.400               |

Fri4av400#019.001.001.1r.esp

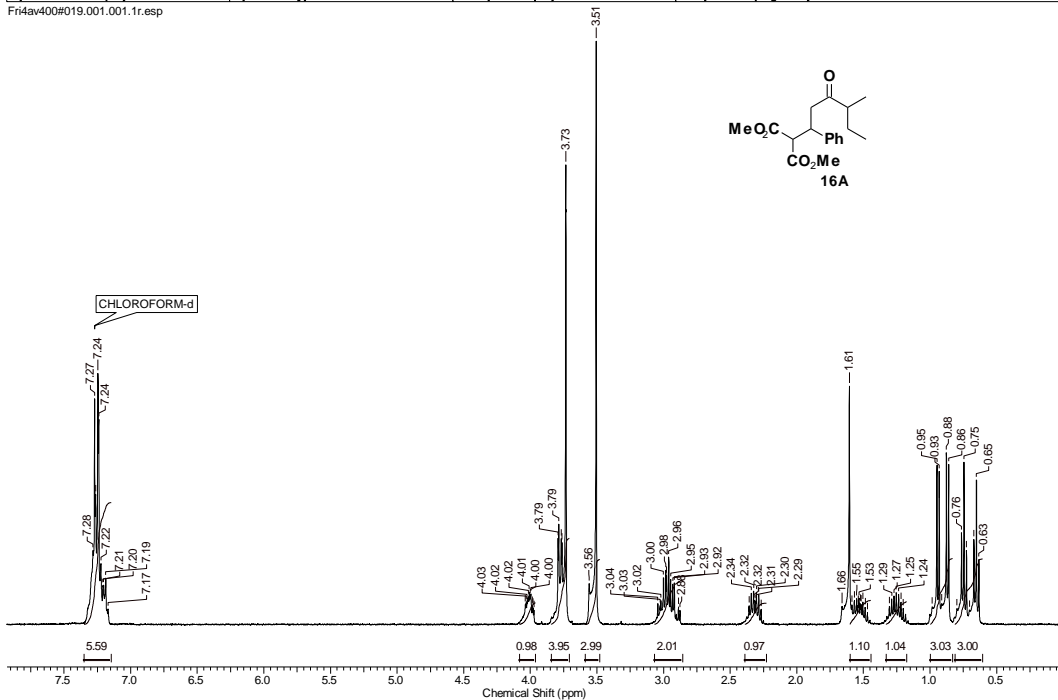

|                               |                      |                          |                                              |                               |                      |
|-------------------------------|----------------------|--------------------------|----------------------------------------------|-------------------------------|----------------------|
| <b>Acquisition Time (sec)</b> | 0.6488               | <b>Comment</b>           | 13C                                          | <b>Date</b>                   | 27 Aug 2011 08:42:48 |
| <b>Date Stamp</b>             | 27 Aug 2011 08:42:48 | <b>File Name</b>         | D:\paper-1\DATA\15\Fri4av400#019\3\data\111r | <b>Origin</b>                 | spect                |
| <b>Frequency (MHz)</b>        | 100.61               | <b>Nucleus</b>           | 13C                                          | <b>Number of Transients</b>   | 12790                |
| <b>Original Points Count</b>  | 16384                | <b>Owner</b>             | root                                         | <b>Points Count</b>           | 32768                |
| <b>Receiver Gain</b>          | 912.00               | <b>SW(cyclical) (Hz)</b> | 25252.53                                     | <b>Pulse Sequence</b>         | zgpg30               |
| <b>Spectrum Type</b>          | STANDARD             | <b>Sweep Width (Hz)</b>  | 25251.75                                     | <b>Solvent</b>                | DMSO-d6              |
|                               |                      |                          |                                              | <b>Spectrum Offset (Hz)</b>   | 9556.2744            |
|                               |                      |                          |                                              | <b>Temperature (degree C)</b> | 24.600               |

Fri4av400#019.003.001.1r.esp

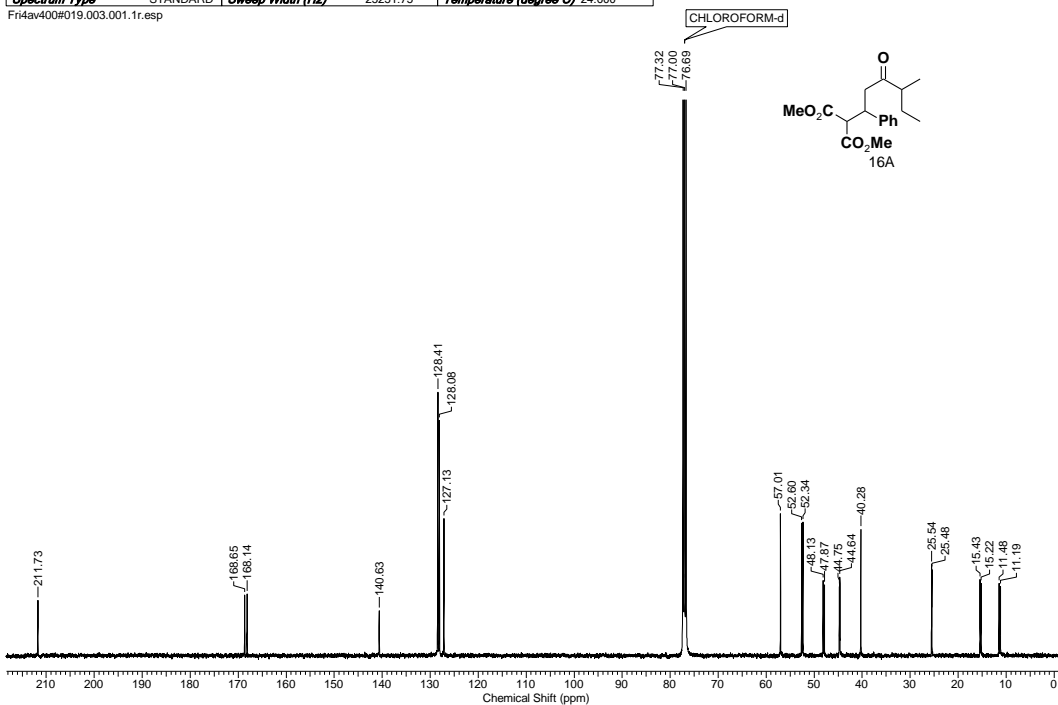

|                        |                      |                   |          |                        |                                              |
|------------------------|----------------------|-------------------|----------|------------------------|----------------------------------------------|
| Acquisition Time (sec) | 0.6816               | Comment           | Dept     | Date                   | 26 Aug 2011 23:04:40                         |
| Date Stamp             | 26 Aug 2011 23:04:40 | File Name         |          | File Name              | E:\paper-1\DATA\15\Fri4av400#019\2\pdata\11r |
| Frequency (MHz)        | 100.61               | Nucleus           | 13C      | Number of Transients   | 4000                                         |
| Original Points Count  | 16384                | Owner             | root     | Points Count           | 32768                                        |
| Receiver Gain          | 16384.00             | SW(cyclical) (Hz) | 24038.46 | Solvent                | DMSO-d6                                      |
| Spectrum Type          | DEPT135              | Sweep Width (Hz)  | 24037.73 | Temperature (degree C) | 24.100                                       |
|                        |                      |                   |          | Spectrum Offset (Hz)   | 10037.1016 VerticalScaleFactor = 1           |

Fri4av400#019.002.001.1r.esp

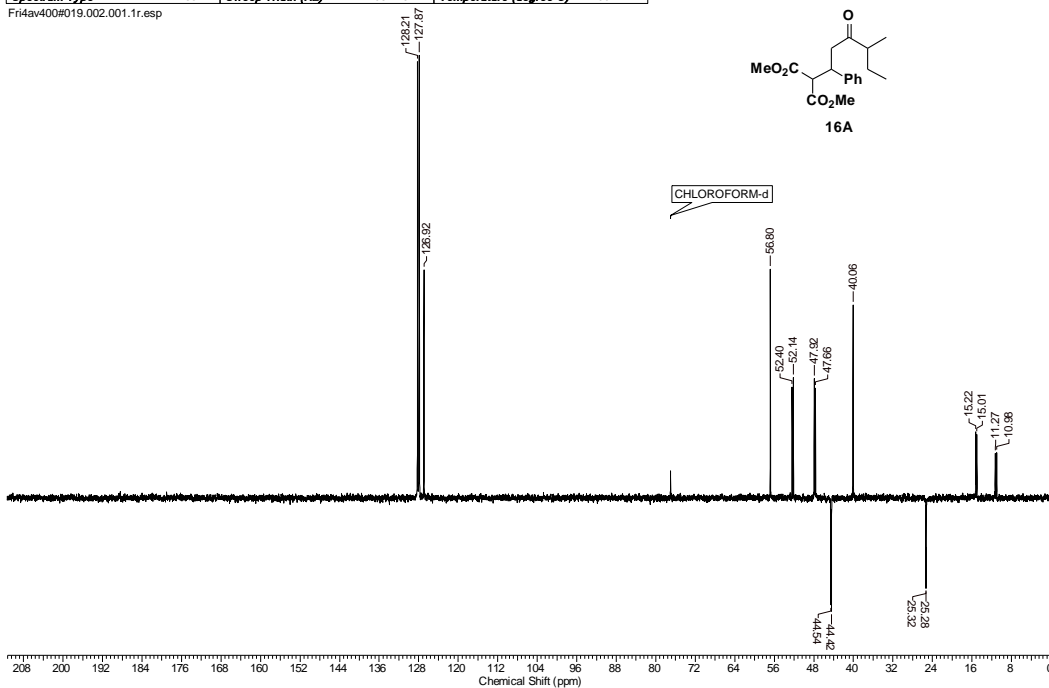

|                        |                      |                   |             |                        |                                              |
|------------------------|----------------------|-------------------|-------------|------------------------|----------------------------------------------|
| Acquisition Time (sec) | 1.6384               | Comment           | 1H Priyanka | Date                   | 10 Sep 2011 12:27:12                         |
| Date Stamp             | 10 Sep 2011 12:27:12 | File Name         |             | File Name              | D:\paper-1\DATA\16\Sat2av500#002\1\pdata\11r |
| Frequency (MHz)        | 500.13               | Nucleus           | 1H          | Number of Transients   | 64                                           |
| Original Points Count  | 16384                | Owner             | nmr         | Points Count           | 32768                                        |
| Receiver Gain          | 203.00               | SW(cyclical) (Hz) | 10000.00    | Solvent                | CHLOROFORM-d                                 |
| Spectrum Offset (Hz)   | 3491.7498            | Spectrum Type     | STANDARD    | Sweep Width (Hz)       | 9999.70                                      |
|                        |                      |                   |             | Temperature (degree C) | 25.000                                       |

Sat2av500#002.001.001.1r.esp

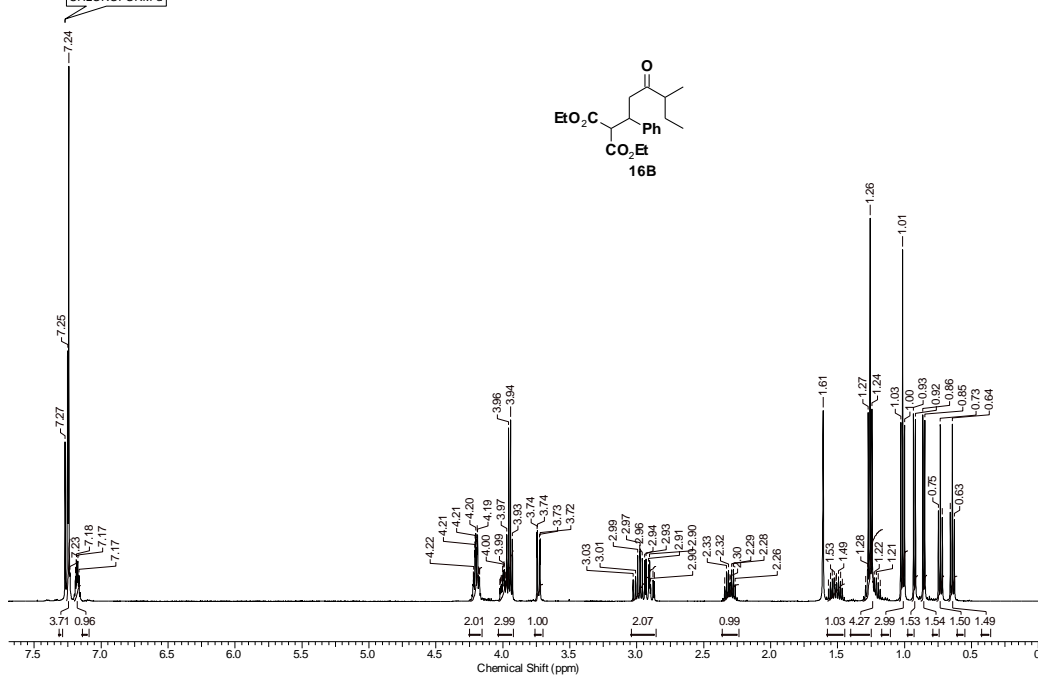

|                               |                      |                          |                                               |                               |                      |
|-------------------------------|----------------------|--------------------------|-----------------------------------------------|-------------------------------|----------------------|
| <b>Acquisition Time (sec)</b> | 1.1010               | <b>Comment</b>           | DEPT135                                       | <b>Date</b>                   | 10 Sep 2011 12:37:52 |
| <b>Date Stamp</b>             | 10 Sep 2011 12:37:52 | <b>File Name</b>         | E:\paper-1\DATA\16\Sat2av500#002\2\pdata1\11r |                               |                      |
| <b>Frequency (MHz)</b>        | 125.76               | <b>Nucleus</b>           | 13C                                           | <b>Number of Transients</b>   | 1200                 |
| <b>Original Points Count</b>  | 32768                | <b>Owner</b>             | nmr                                           | <b>Points Count</b>           | 32768                |
| <b>Receiver Gain</b>          | 2050.00              | <b>SW(cyclical) (Hz)</b> | 29761.90                                      | <b>Solvent</b>                | CHLOROFORM-d         |
| <b>Spectrum Offset (Hz)</b>   | 12547.5518           | <b>Spectrum Type</b>     | DEPT135                                       | <b>Sweep Width (Hz)</b>       | 29761.00             |
|                               |                      |                          |                                               | <b>Temperature (degree C)</b> | 25.200               |

Sat2av500#002.002.001.1r.esp

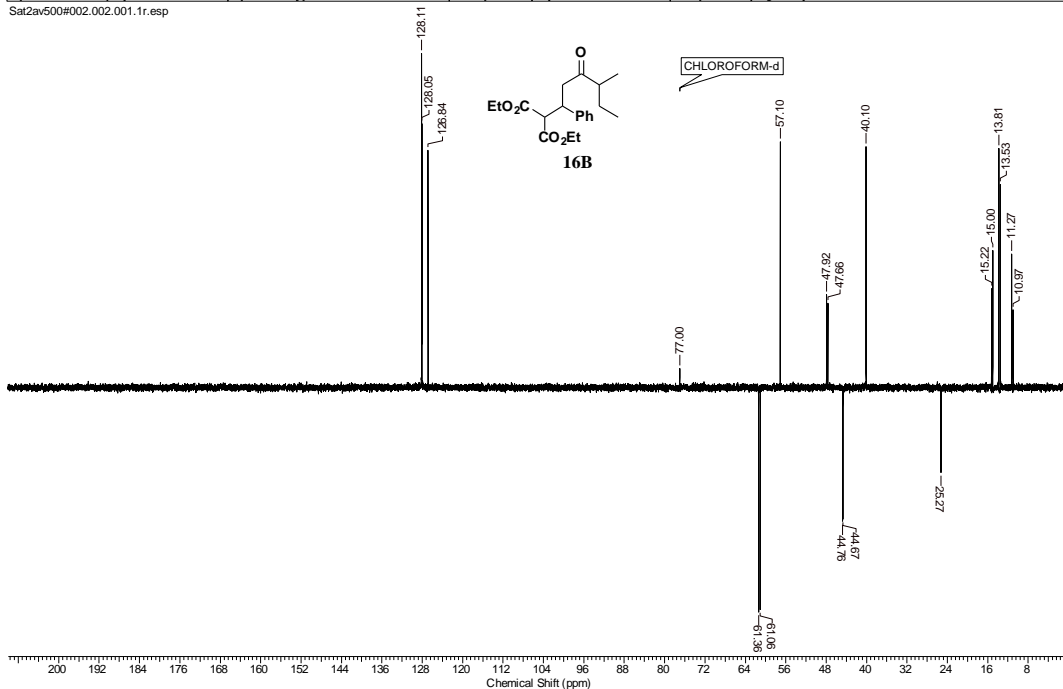

|                               |                      |                          |                                               |                               |                      |
|-------------------------------|----------------------|--------------------------|-----------------------------------------------|-------------------------------|----------------------|
| <b>Acquisition Time (sec)</b> | 1.1010               | <b>Comment</b>           | 13C                                           | <b>Date</b>                   | 10 Sep 2011 15:41:20 |
| <b>Date Stamp</b>             | 10 Sep 2011 15:41:20 | <b>File Name</b>         | E:\paper-1\DATA\16\Sat2av500#002\3\pdata1\11r |                               |                      |
| <b>Frequency (MHz)</b>        | 125.76               | <b>Nucleus</b>           | 13C                                           | <b>Number of Transients</b>   | 3397                 |
| <b>Original Points Count</b>  | 32768                | <b>Owner</b>             | nmr                                           | <b>Points Count</b>           | 32768                |
| <b>Receiver Gain</b>          | 2050.00              | <b>SW(cyclical) (Hz)</b> | 29761.90                                      | <b>Solvent</b>                | CHLOROFORM-d         |
| <b>Spectrum Offset (Hz)</b>   | 12572.9824           | <b>Spectrum Type</b>     | STANDARD                                      | <b>Sweep Width (Hz)</b>       | 29761.00             |
|                               |                      |                          |                                               | <b>Temperature (degree C)</b> | 25.800               |

Sat2av500#002.003.001.1r.esp

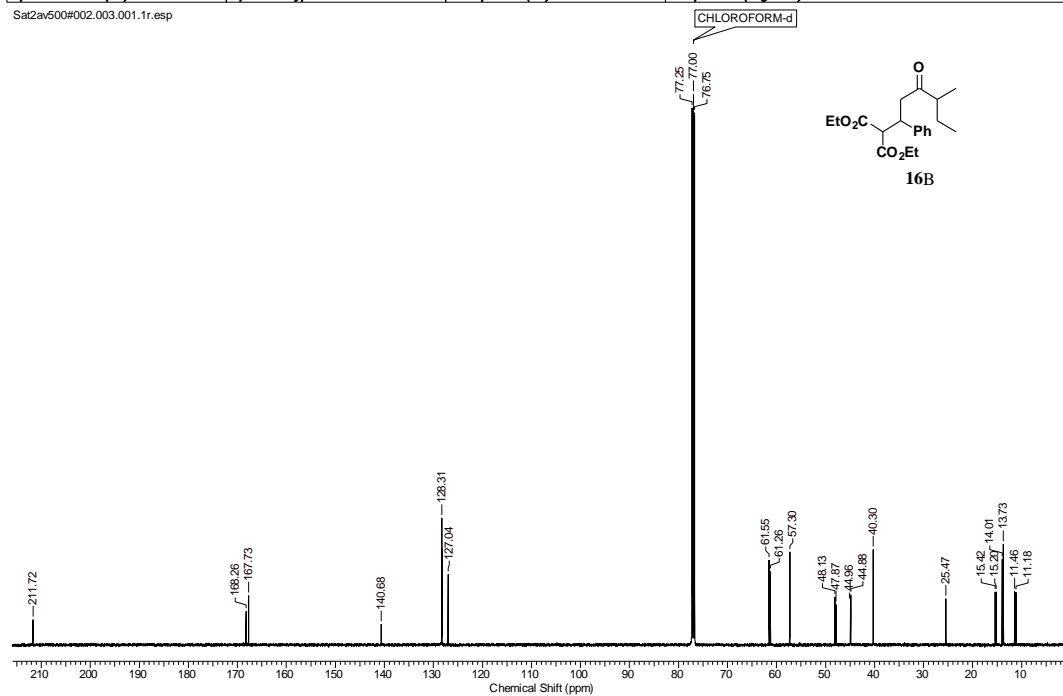

## **HRMS SPECTRAS**

6A #1-19 RT: 0.01-0.21 AV: 19 NL: 1.53E7  
T: FTMS + p ESI Full ms [200.00-800.00]

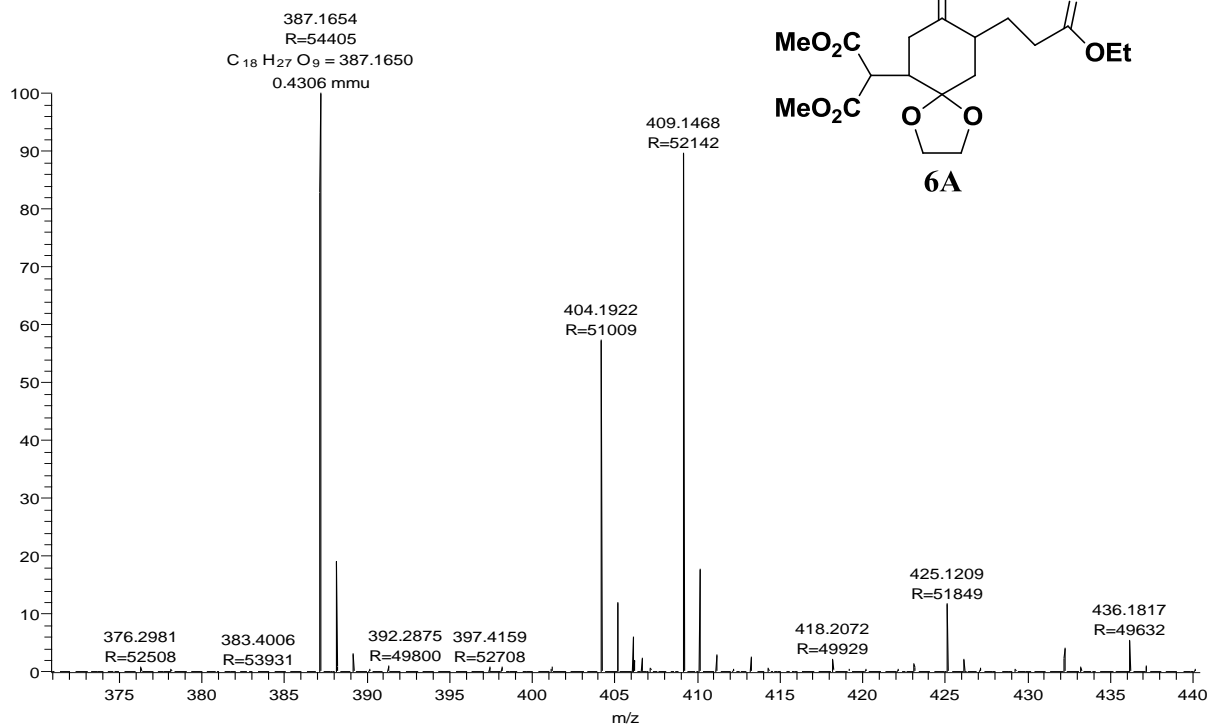

7A #1-18 RT: 0.01-0.20 AV: 18 NL: 7.36E6  
T: FTMS + p ESI Full ms [200.00-800.00]

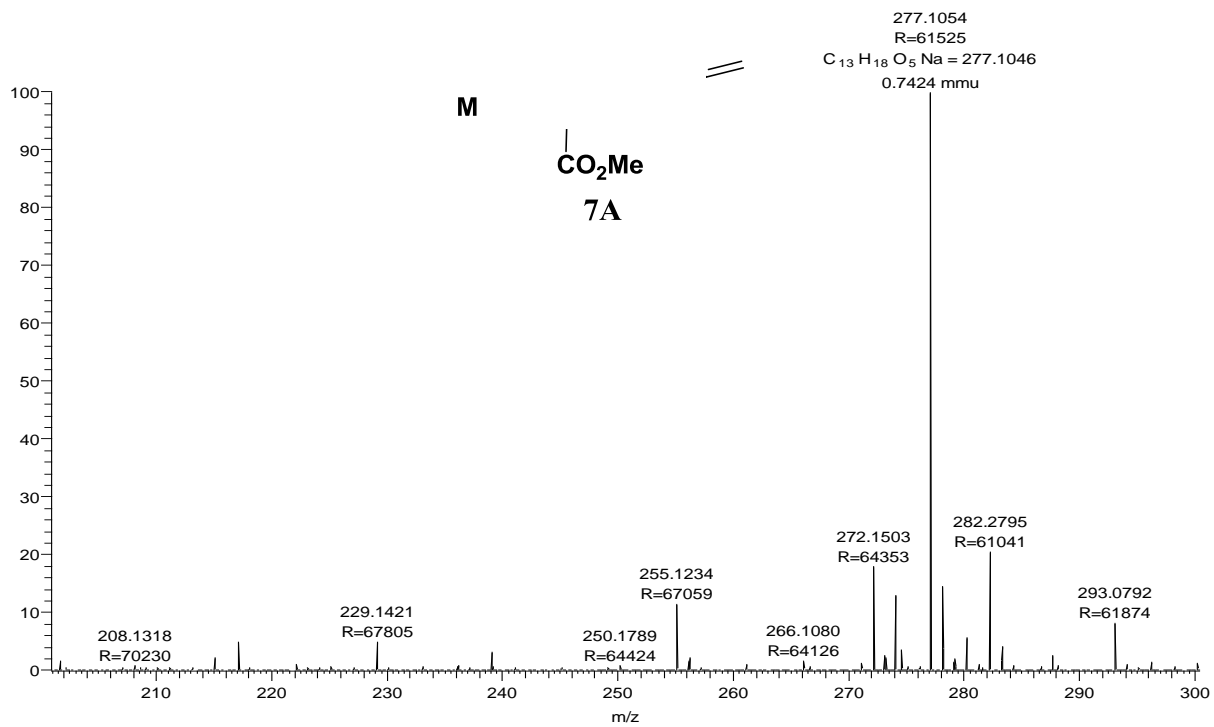

8A #1-17 RT: 0.01-0.21 AV: 17 NL: 3.12E6  
T: FTMS + p ESI Full ms [200.00-800.00]

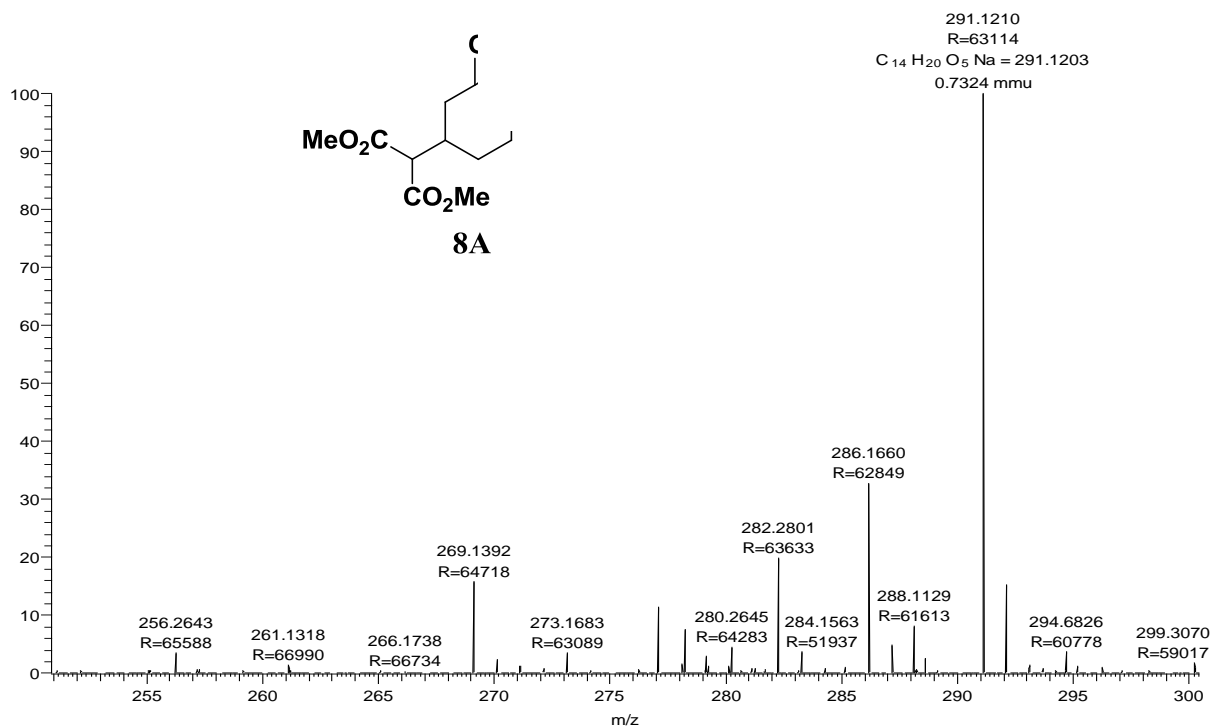

8B #1-18 RT: 0.01-0.21 AV: 18 NL: 3.27E6  
T: FTMS + p ESI Full ms [200.00-800.00]

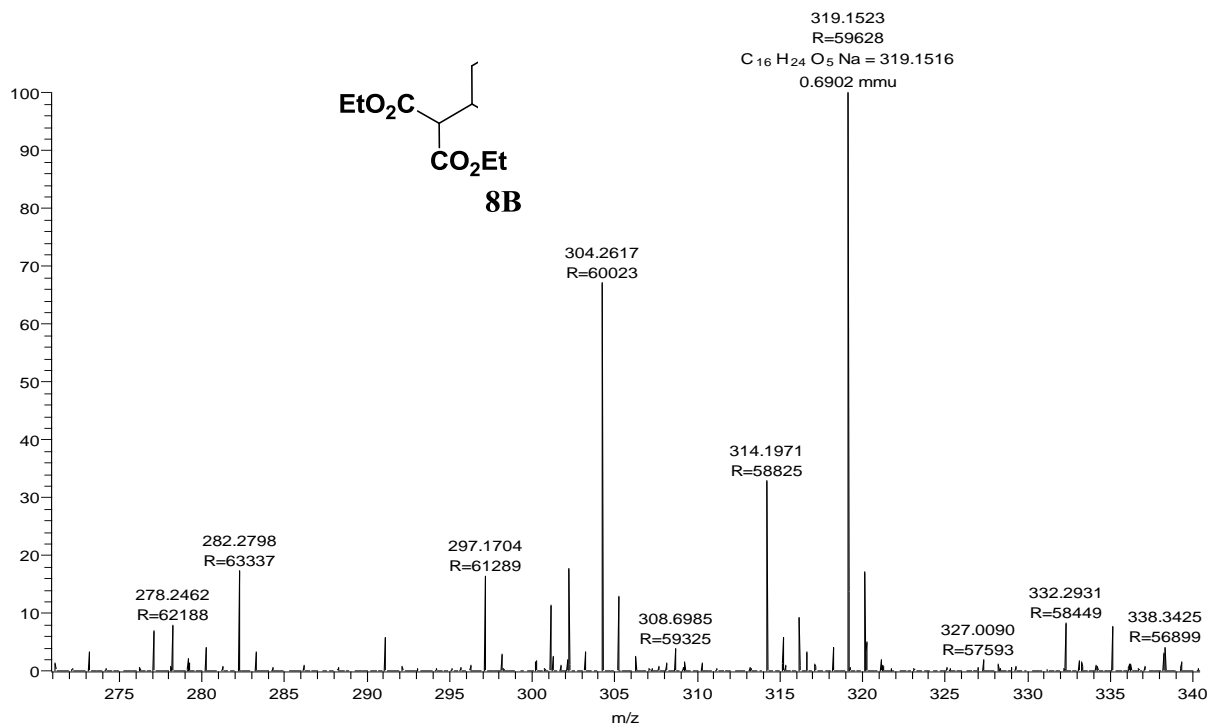

10A #1-18 RT: 0.01-0.21 AV: 18 NL: 2.84E6  
T: FTMS + p ESI Full ms [200.00-800.00]

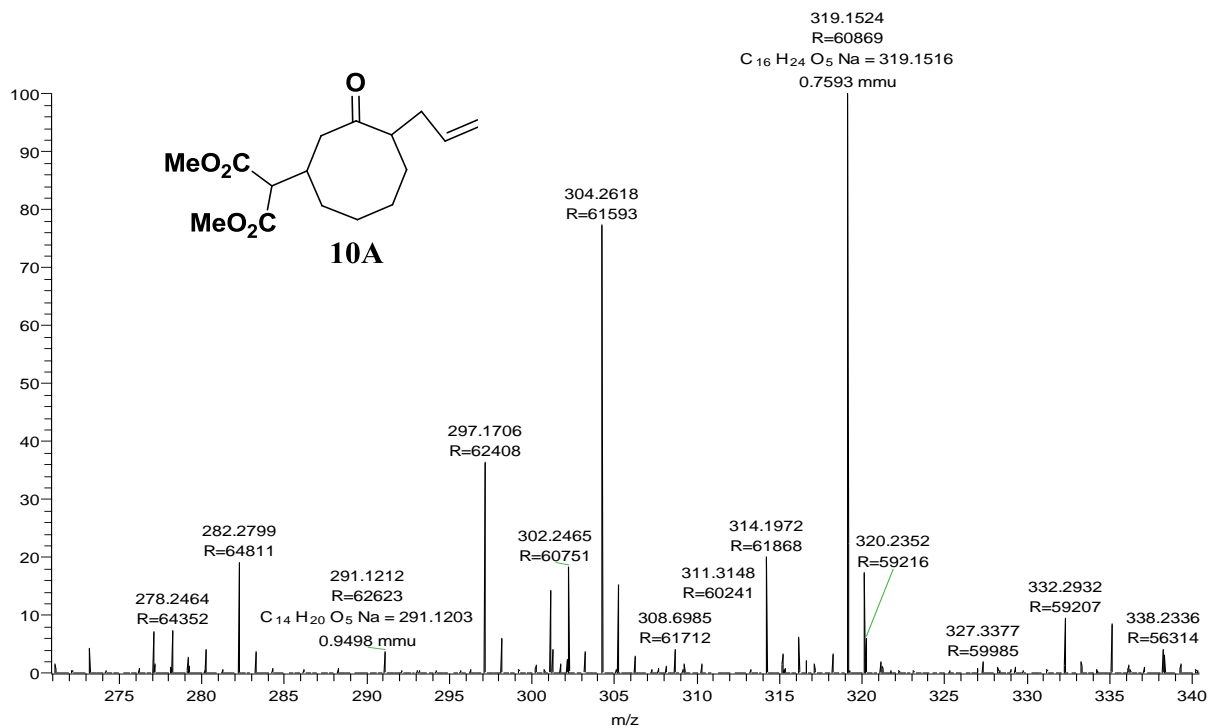

11A #1-18 RT: 0.01-0.21 AV: 18 NL: 6.49E6  
T: FTMS + p ESI Full ms [200.00-800.00]

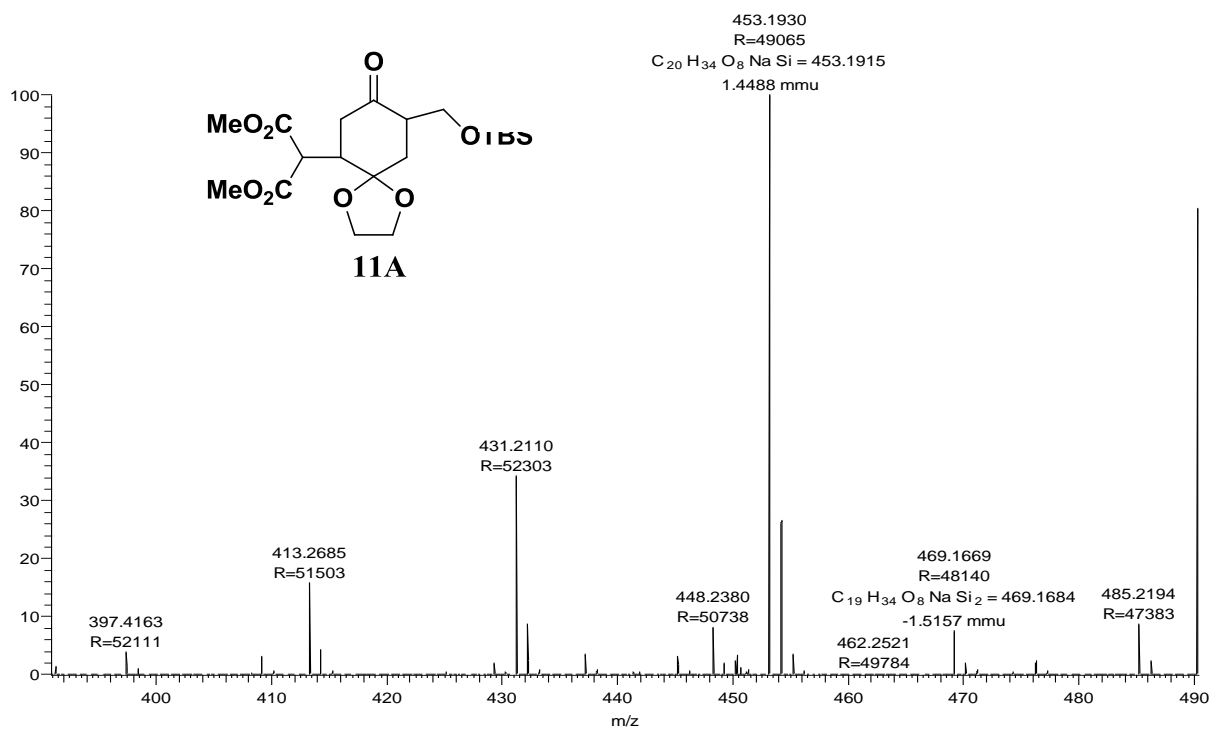

12A #1-19 RT: 0.01-0.21 AV: 19 NL: 1.08E7  
T: FTMS + p ESI Full ms [200.00-800.00]

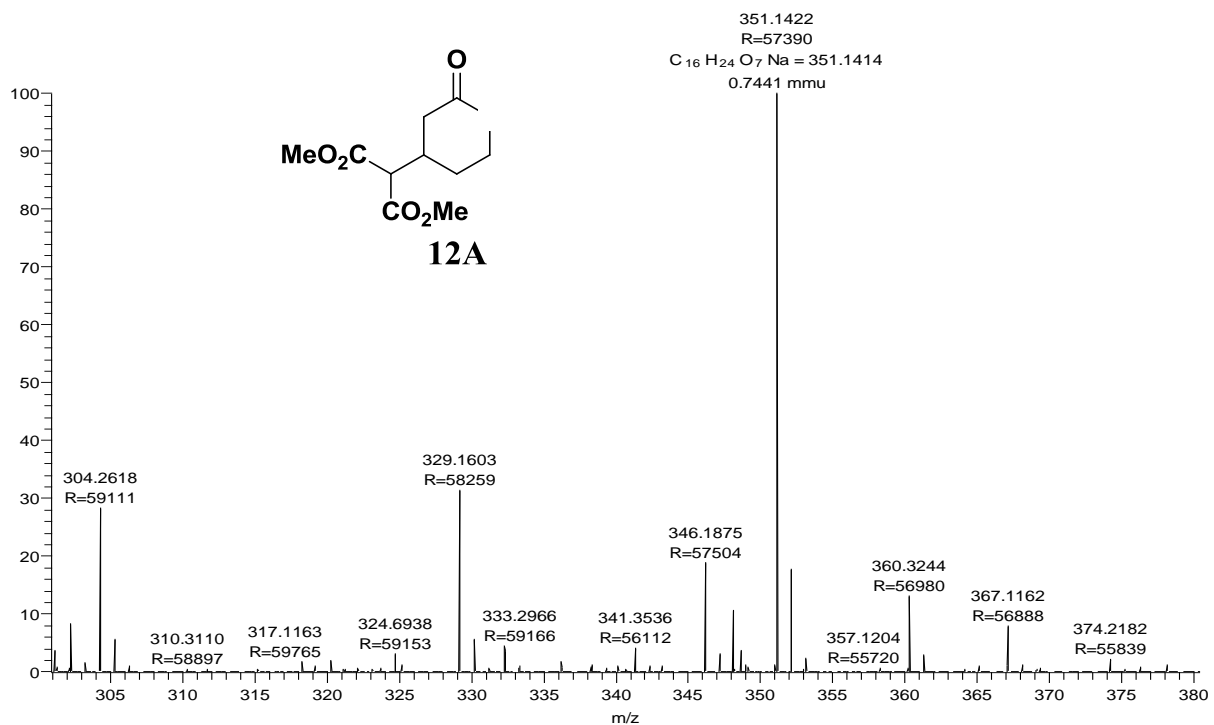

12B #1-19 RT: 0.01-0.22 AV: 19 NL: 1.36E7  
T: FTMS + p ESI Full ms [200.00-800.00]

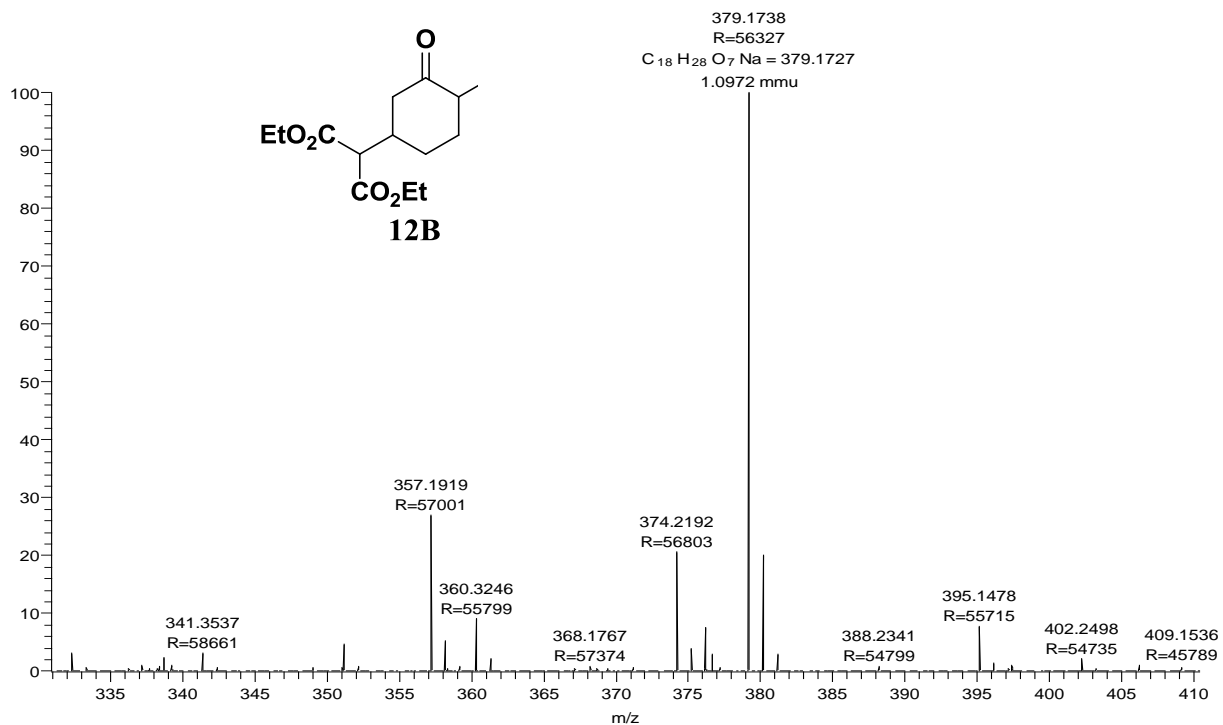



13A #1-18 RT: 0.01-0.20 AV: 18 NL: 1.23E7  
T: FTMS + p ESI Full ms [200.00-800.00]

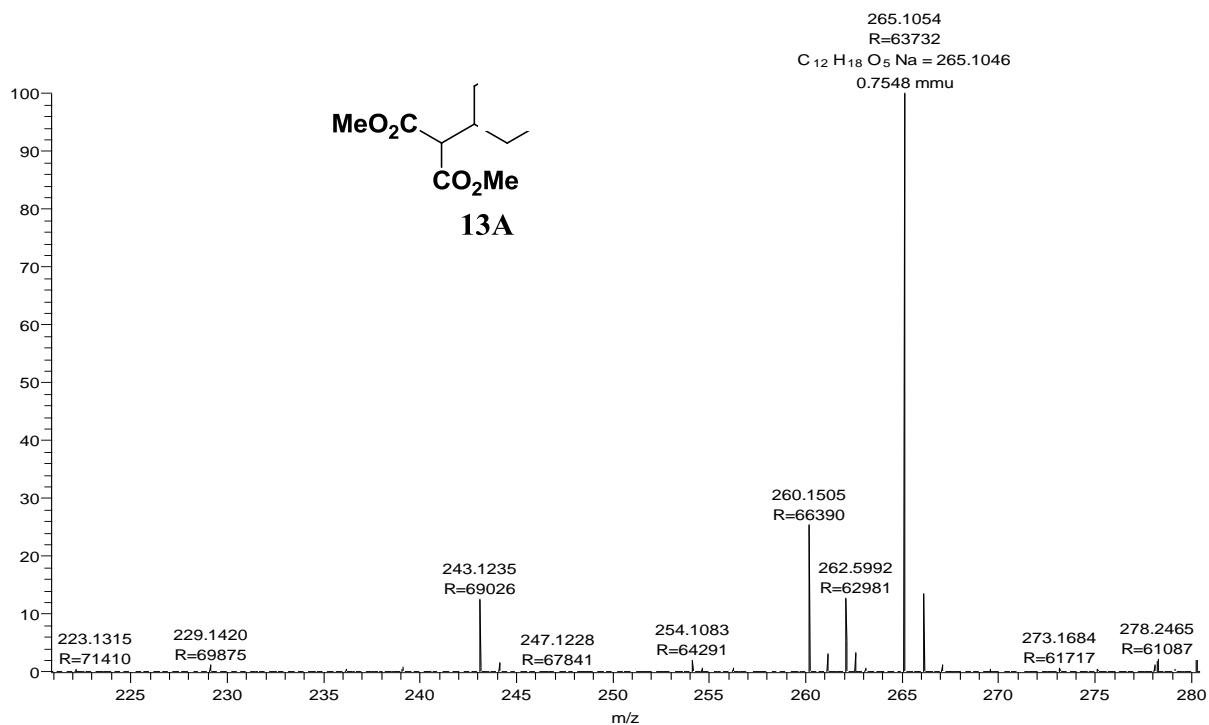

13B #1-19 RT: 0.01-0.21 AV: 19 NL: 2.28E7  
T: FTMS + p ESI Full ms [200.00-800.00]

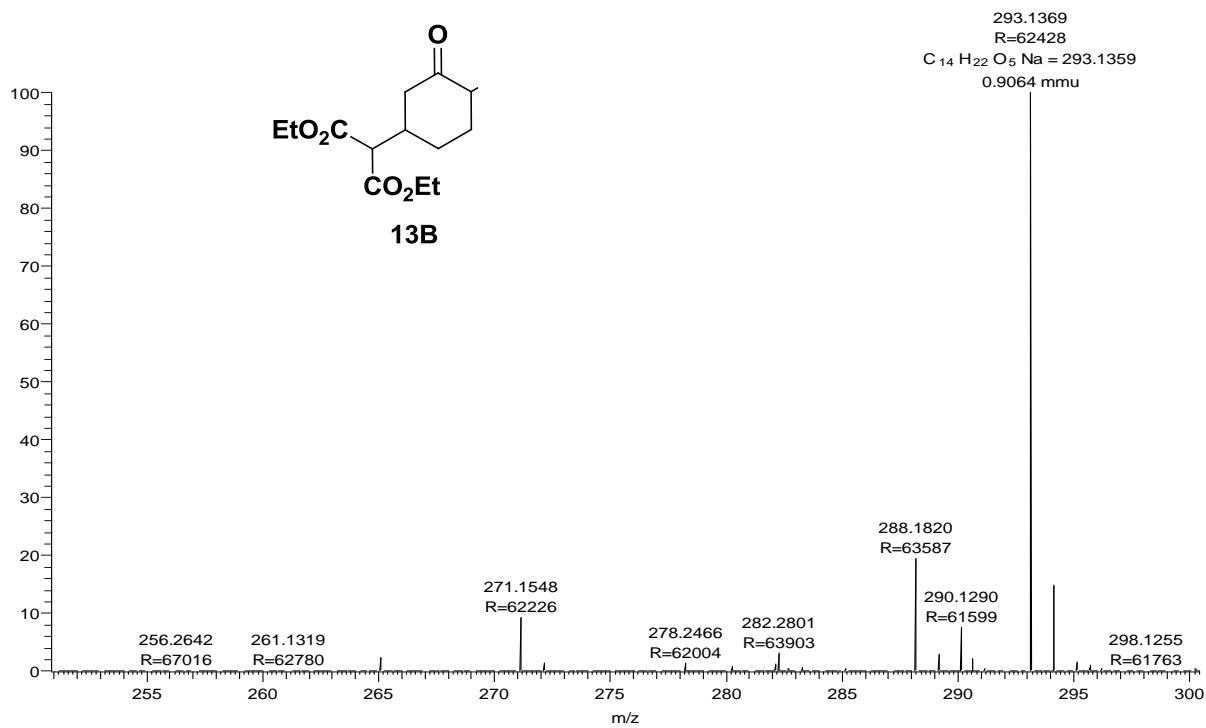

16A #1-19 RT: 0.01-0.21 AV: 19 NL: 1.22E7  
T: FTMS + p ESI Full ms [200.00-800.00]

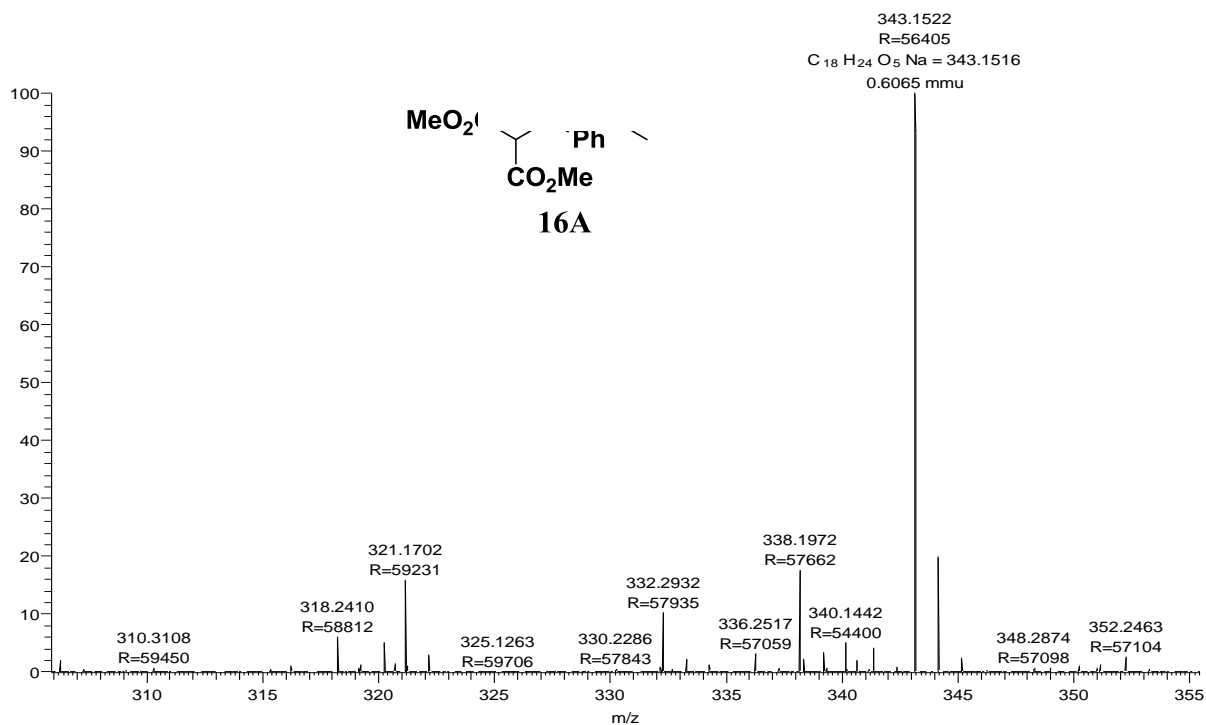

16B #1-19 RT: 0.01-0.21 AV: 19 NL: 1.21E7  
T: FTMS + p ESI Full ms [200.00-800.00]

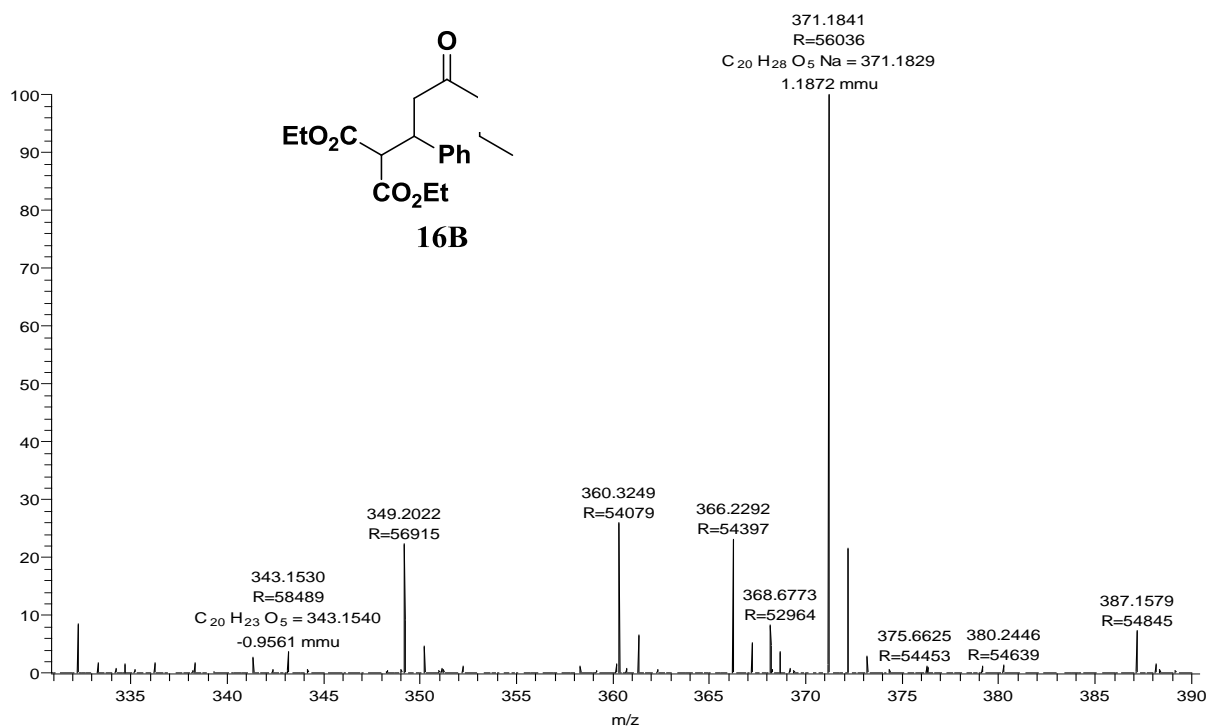

# HPLC spectras:

Shimadzu CLASS-VP V6.12 SP5

Method Name: C:\CLASS-VP\Method ch 2.met  
 Data Name: C:\CLASS-VP\Data\Dr.Ganesh Pandey\gp-1732  
 User: System  
 Acquired: 12/27/11 11:05:15 AM  
 Printed: 12/30/11 5:58:37 PM  
 Sample Name: substrate 1 rac

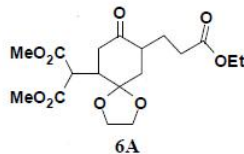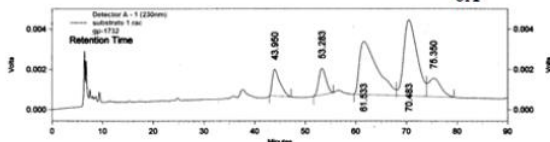

| Retention Time | C Area         | Area %         |
|----------------|----------------|----------------|
| 43.950         | 141005         | 7.954          |
| 53.283         | 133311         | 7.520          |
| 61.533         | 645879         | 36.434         |
| 70.483         | 696431         | 39.286         |
| 75.350         | 156110         | 8.806          |
| <b>Totals</b>  | <b>1772736</b> | <b>100.000</b> |

Project Leader :Dr.Ganesh Pandey  
 Column :Chirocel OJ-H(250x4.6 mm)  
 Mobile Phase :IPA:Pet Ether (20:80)  
 Wavelength :220 nm  
 Flow Rate :0.5 ml/min (23Kgf)  
 conc. :1 mg/1.0mL  
 Inj vol :5 ul

Shimadzu CLASS-VP V6.12 SP5

Method Name: C:\CLASS-VP\Method ch 2.met  
 Data Name: C:\CLASS-VP\Data\Dr.Ganesh Pandey\gp-1733  
 User: System  
 Acquired: 12/27/11 12:52:31 PM  
 Printed: 12/30/11 6:05:20 PM  
 Sample Name: substrate 1 chiral

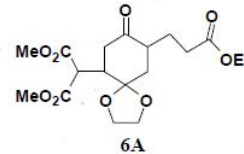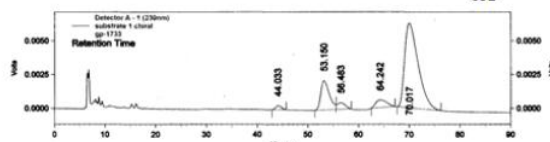

| Retention Time | C Area         | Area %         |
|----------------|----------------|----------------|
| 44.033         | 23712          | 1.497          |
| 53.150         | 253647         | 16.009         |
| 56.483         | 54286          | 3.426          |
| 64.242         | 86270          | 5.445          |
| 70.017         | 1166456        | 73.623         |
| <b>Totals</b>  | <b>1584371</b> | <b>100.000</b> |

Project Leader :Dr.Ganesh Pandey  
 Column :Chirocel OJ-H(250x4.6 mm)  
 Mobile Phase :IPA:Pet Ether (20:80)  
 Wavelength :220 nm  
 Flow Rate :0.5 ml/min (23Kgf)  
 conc. :1 mg/1.0mL  
 Inj vol :5 ul

Sample Name: paa-roc enone

Method Name: C:\CLASS-VP\Method ch 1.met  
 Data Name: C:\CLASS-VP\Data\Dr.Ganesh Pandey\gp-1322  
 User: System  
 Acquired: 3/16/11 3:44:17 PM  
 Printed: 3/16/11 3:14:09 PM

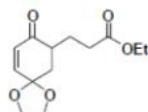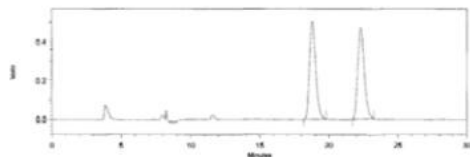

| PK.#          | Retention Time | Area            | Area %         |
|---------------|----------------|-----------------|----------------|
| 1             | 18.800         | 15798626        | 50.426         |
| 2             | 22.308         | 15502311        | 49.574         |
| <b>Totals</b> |                | <b>31300937</b> | <b>100.000</b> |

Project Leader : Dr. Ganesh Pandey  
 Column :Kromasil-3-Amcost (250x4.6mm)  
 M.P. : IPA:PE (05:95)  
 Wavelength :220nm  
 Flow :1 ml/min (600psi)  
 conc. :1 mg/1 ml IPA  
 Injection vol :5 ul

Sample Name: paa-roc enone

Method Name: C:\CLASS-VP\Method ch 1.met  
 Data Name: C:\CLASS-VP\Data\Dr.Ganesh Pandey\gp-1322  
 User: System  
 Acquired: 3/16/11 3:44:17 PM  
 Printed: 3/16/11 4:17:10 PM

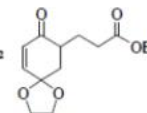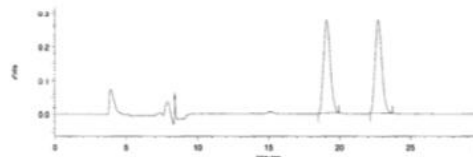

| PK.#          | Retention Time | Area            | Area %         |
|---------------|----------------|-----------------|----------------|
| 1             | 19.083         | 9246646         | 50.164         |
| 2             | 22.773         | 9188293         | 49.836         |
| <b>Totals</b> |                | <b>18434941</b> | <b>100.000</b> |

Project Leader : Dr. Ganesh Pandey  
 Column :Kromasil-3-Amcost (250x4.6mm)  
 M.P. : IPA:PE (05:95)  
 Wavelength :220nm  
 Flow :1 ml/min (600psi)  
 conc. :1 mg/1 ml IPA  
 Injection vol :5 ul

Shimadzu CLASS-VP V6.12 SP5  
 Method Name: C:\CLASS-VP\Method ch 2.met  
 Data Name: C:\CLASS-VP\Data\Dr.Ganesh Pandey\gp-1718  
 User: System  
 Acquired: 11/22/11 3:06:23 PM  
 Printed: 12/30/11 5:41:09 PM  
 Sample Name: PAA-TBS rac

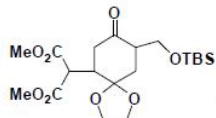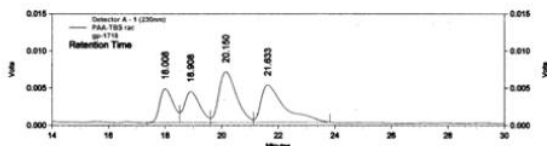

| Retention Time | C Area        | Area %         |
|----------------|---------------|----------------|
| 18.008         | 149958        | 16.803         |
| 18.908         | 158394        | 17.835         |
| 20.150         | 292322        | 32.952         |
| 21.633         | 287336        | 32.390         |
| <b>Totals</b>  | <b>887110</b> | <b>100.000</b> |

Project Leader :Dr.Ganesh Pandey  
 Column :Chiralcel OI-H(250x4.6 mm)  
 Mobile Phase :IPA:Pet Ether (10:90)  
 Wavelength : 220 nm  
 Flow Rate :0.5 ml/min (23Kg)  
 conc. :.1 mg/1.0mL  
 Inj vol- : 5 ul

Shimadzu CLASS-VP V6.12 SP5  
 Method Name: C:\CLASS-VP\Method ch 2.met  
 Data Name: C:\CLASS-VP\Data\Dr.Ganesh Pandey\gp-1719  
 User: System  
 Acquired: 11/22/11 3:42:30 PM  
 Printed: 12/30/11 5:43:23 PM  
 Sample Name: PAA-TBS chiral

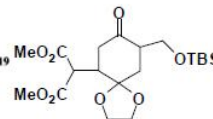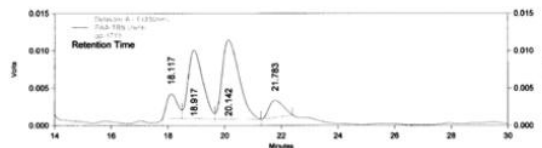

| Retention Time | C Area        | Area %         |
|----------------|---------------|----------------|
| 18.117         | 86017         | 9.233          |
| 18.917         | 331907        | 35.627         |
| 20.142         | 434420        | 46.631         |
| 21.783         | 79261         | 8.508          |
| <b>Totals</b>  | <b>931605</b> | <b>100.000</b> |

Project Leader :Dr.Ganesh Pandey  
 Column :Chiralcel OI-H(250x4.6 mm)  
 Mobile Phase :IPA:Pet Ether (10:90)  
 Wavelength : 220 nm  
 Flow Rate :0.5 ml/min (23Kg)  
 conc. :.1 mg/1.0mL  
 Inj vol- : 5 ul

Shimadzu CLASS-VP V6.12 SP5  
 Method Name: C:\CLASS-VP\Method ch 2.met  
 Data Name: C:\CLASS-VP\Data\Dr.Ganesh Pandey\gp-1395  
 User: System  
 Acquired: 6/4/11 8:00:43 PM  
 Printed: 6/6/11 5:11:16 PM  
 Sample Name: paa-2741 RAC

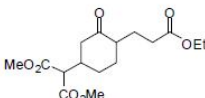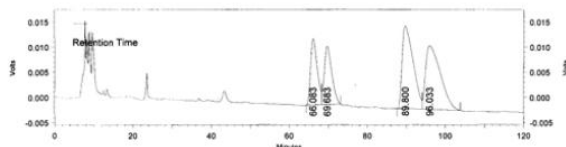

| Retention Time | C Area         | Area %         |
|----------------|----------------|----------------|
| 66.083         | 1556456        | 16.097         |
| 69.683         | 1542824        | 15.956         |
| 89.800         | 3235931        | 33.466         |
| 96.033         | 3334098        | 34.481         |
| <b>Totals</b>  | <b>9669309</b> | <b>100.000</b> |

Project Leader : Dr.G Pandey  
 Column :Chiralcel OD-H (250x4.6mm)  
 Mobile Phase :Ethanol:n-Hexane (0.4:99.6)  
 Wavelength : 230nm  
 Flow Rate : 0.5ml/min 235 kgf  
 conc. :.xmg/0.5ml  
 Inj vol- :.5ul

Shimadzu CLASS-VP V6.12 SP5  
 Page 1 of 1 paa-2741 B

Area % Report

Method Name: C:\CLASS-VP\Methods\Date6\June.met  
 Data Name: C:\CLASS-VP\Data\Dr.Ganesh Pandey\gp-1396  
 User: System  
 Acquired: 6/4/11 10:16:02 PM  
 Printed: 6/6/11 11:56:15 AM

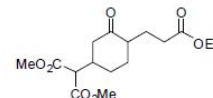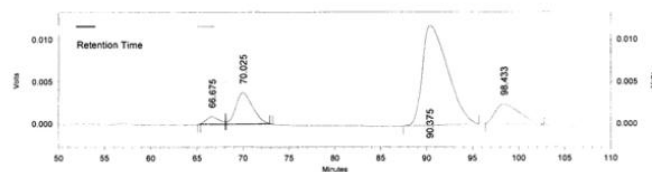

| PK #          | Retention Time | Area           | Area %         | Height       | Height %       |
|---------------|----------------|----------------|----------------|--------------|----------------|
| 1             | 66.675         | 81950          | 2.533          | 823          | 4.384          |
| 2             | 70.025         | 457712         | 14.149         | 3699         | 19.703         |
| 3             | 90.375         | 2264268        | 69.993         | 11919        | 63.487         |
| 4             | 98.433         | 431050         | 13.325         | 2333         | 12.427         |
| <b>Totals</b> |                | <b>3234980</b> | <b>100.000</b> | <b>18774</b> | <b>100.000</b> |

Project Leader :Dr. Ganesh Pandey  
 Column :Chiralcel OD-H0 0.46cm X 25cm  
 Mobile Phase :Ethanol: n-Hexane (1.5:98.5)  
 Flow Rate : 0.5 ml/min  
 Wavelength : 230nm  
 Con. :4mg 0.5ml  
 Inject vol. :15ul.

Shimadzu CLASS-VP V6.12 SP5  
 Method Name: C:\CLASS-VP\Method ch 2.met  
 Data Name: C:\CLASS-VP\Data\Dr.Ganesh Pandey\gp-1478  
 User: System  
 Acquired: 6/28/11 4:30:42 PM  
 Printed: 6/29/11 5:20:55 PM  
 Sample Name: PAA-286-10 RAC

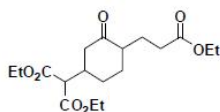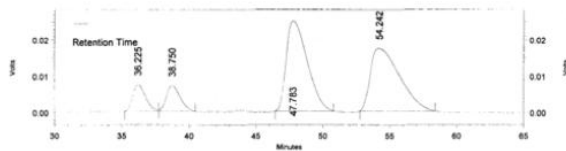

| Retention Time | C Area         | Area %         |
|----------------|----------------|----------------|
| 36.225         | 484977         | 7.674          |
| 38.750         | 502208         | 7.946          |
| 47.783         | 2710434        | 42.887         |
| 54.242         | 2622304        | 41.493         |
| <b>Totals</b>  | <b>6319923</b> | <b>100.000</b> |

Project Leader :Dr. Ganesh Pandey  
 Column :Chiralcel OD-H (4.6x250 mm)  
 Mobile Phase :EtOH : n-Hexane (1.5:98.5)  
 Flow Rate : 0.5ml/min ( Pressure 235kgf)  
 Wavelength : 230nm  
 Con. : 2mg/0.5ml

Inject vol. :20uL

Shimadzu CLASS-VP V6.12 SP5  
 Method Name: C:\CLASS-VP\Method ch 2.met  
 Data Name: C:\CLASS-VP\Data\Dr.Ganesh Pandey\gp-1479  
 User: System  
 Acquired: 6/28/11 5:39:16 PM  
 Printed: 6/29/11 5:25:49 PM  
 Sample Name: PAA-286-10 CHIRAL

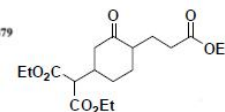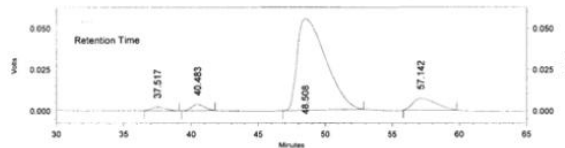

| Retention Time | C Area         | Area %         |
|----------------|----------------|----------------|
| 37.817         | 152120         | 1.612          |
| 40.483         | 245139         | 2.598          |
| 48.508         | 8193019        | 86.846         |
| 57.142         | 843705         | 8.943          |
| <b>Totals</b>  | <b>9433983</b> | <b>100.000</b> |

Project Leader :Dr. Ganesh Pandey  
 Column :Chiralcel OD-H (4.6x250 mm)  
 Mobile Phase :EtOH : n-Hexane (1.5:98.5)  
 Flow Rate : 0.5ml/min ( Pressure 235kgf)  
 Wavelength : 230nm  
 Con. : 2mg/0.5ml

Inject vol. :20uL

Shimadzu CLASS-VP V6.12 SP5  
 Method Name: C:\CLASS-VP\Method ch 2.met  
 Data Name: C:\CLASS-VP\Data\Dr.Ganesh Pandey\gp-1486  
 User: System  
 Acquired: 6/30/11 12:34:35 PM  
 Printed: 6/30/11 2:54:17 PM  
 Sample Name: PAA-287 iii Rac

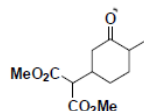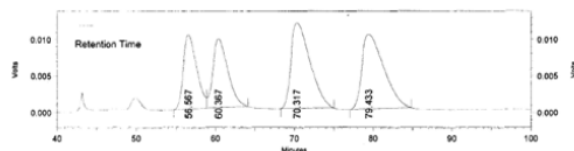

| Retention Time | C Area         | Area %         |
|----------------|----------------|----------------|
| 56.567         | 1185498        | 18.610         |
| 60.367         | 1233708        | 19.388         |
| 70.317         | 1974666        | 31.032         |
| 79.433         | 1969409        | 30.950         |
| <b>Totals</b>  | <b>6363281</b> | <b>100.000</b> |

Project Leader :Dr. Ganesh Pandey  
 Column :Chiralpak OD-H (4.6x250 mm)  
 Mobile Phase :EtOH : n-Hexane (0.4:99.6)  
 Flow Rate : 0.5ml/min ( Pressure 235kgf)  
 Wavelength : 230nm  
 Con. : 2mg/0.5ml

Inject vol. :20uL

Shimadzu CLASS-VP V6.12 SP5  
 Method Name: C:\CLASS-VP\Method ch 2.met  
 Data Name: C:\CLASS-VP\Data\Dr.Ganesh Pandey\gp-1485  
 User: System  
 Acquired: 6/30/11 10:51:34 AM  
 Printed: 6/30/11 2:49:57 PM  
 Sample Name: PAA-287 iii Chiral

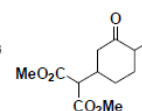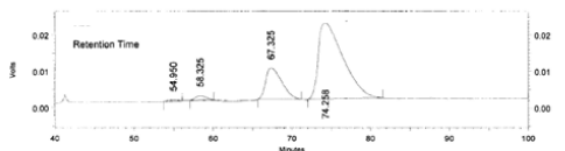

| Retention Time | C Area         | Area %         |
|----------------|----------------|----------------|
| 54.950         | 27708          | 0.465          |
| 58.325         | 115886         | 1.946          |
| 67.325         | 1227209        | 20.613         |
| 74.258         | 4582908        | 76.976         |
| <b>Totals</b>  | <b>5953711</b> | <b>100.000</b> |

Project Leader :Dr. Ganesh Pandey  
 Column :Chiralpak OD-H (4.6x250 mm)  
 Mobile Phase :EtOH : n-Hexane (0.4:99.6)  
 Flow Rate : 0.5ml/min ( Pressure 235kgf)  
 Wavelength : 230nm  
 Con. : 2mg/0.5ml

Inject vol. :20uL

Shimadzu CLASS-VP V6.12 SP5  
 Method Name: C:\CLASS-VP\Method ch 2.met  
 Data Name: C:\CLASS-VP\Data\Dr.Ganesh Pandey\gp-1630  
 User: System  
 Acquired: 8/29/11 3:11:22 PM  
 Printed: 8/29/11 4:29:07 PM  
 Sample Name: PAA-ETHYL-METHYL racemic

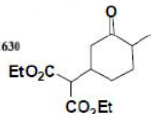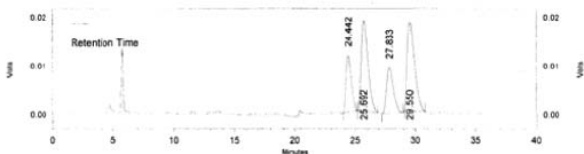

| Retention Time | C Area         | Area %         |
|----------------|----------------|----------------|
| 24.442         | 375714         | 16.750         |
| 25.692         | 715707         | 31.908         |
| 27.833         | 344823         | 15.608         |
| 29.550         | 704763         | 30.433         |
| <b>Totals</b>  | <b>2243007</b> | <b>100.000</b> |

Project Leader :Dr. Ganesh Pandey  
 Column :Chiralcel OJ-H (4.6x250 mm)  
 Mobile Phase :Ethanol:n-Hexane: (0.6:99.4)  
 Flow Rate : 0.7ml/min ( Pressure >51 psi)  
 Wavelength : 230 nm  
 Con. : 0.5mg/1ml  
 Inject vol. :5uL

Shimadzu CLASS-VP V6.12 SP5  
 Method Name: C:\CLASS-VP\Method ch 2.met  
 Data Name: C:\CLASS-VP\Data\Dr.Ganesh Pandey\gp-1631  
 User: System  
 Acquired: 8/29/11 3:52:15 PM  
 Printed: 8/29/11 5:33:31 PM  
 Sample Name: PAA-ETHYL-METHYL Chiral

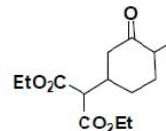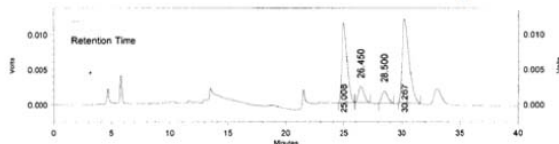

| Retention Time | C Area         | Area %         |
|----------------|----------------|----------------|
| 25.008         | 385026         | 36.811         |
| 26.450         | 75420          | 7.211          |
| 28.500         | 57735          | 5.520          |
| 30.267         | 527773         | 50.459         |
| <b>Totals</b>  | <b>1045954</b> | <b>100.000</b> |

Project Leader :Dr. Ganesh Pandey  
 Column :Chiralcel OJ-H (4.6x250 mm)  
 Mobile Phase :Ethanol:n-Hexane: (0.6:99.4)  
 Flow Rate : 0.7ml/min ( Pressure 351 psi)  
 Wavelength : 230 nm  
 Con. : 0.5mg/1ml  
 Inject vol. :5uL

Shimadzu CLASS-VP V6.12 SP5  
 Method Name: C:\CLASS-VP\Method ch 2.met  
 Data Name: C:\CLASS-VP\Data\Dr.Ganesh Pandey\gp-1578  
 User: System  
 Acquired: 8/10/11 12:17:58 PM  
 Printed: 8/10/11 1:03:36 PM  
 Sample Name: PAA- NITRO-METHYL-RACEMIC

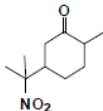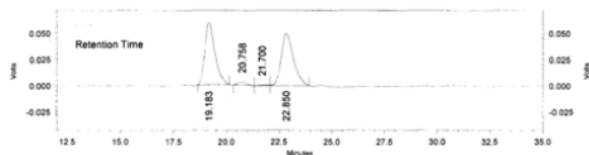

| Retention Time | C Area         | Area %         |
|----------------|----------------|----------------|
| 19.183         | 1994552        | 48.729         |
| 20.758         | 81851          | 2.000          |
| 21.700         | 20552          | 0.502          |
| 22.850         | 1996232        | 48.770         |
| <b>Totals</b>  | <b>4093187</b> | <b>100.000</b> |

Project Leader :Dr. Ganesh Pandey  
 Column :Chiralcel-OD-H (4.6x250 mm)  
 Mobile Phase :IPA:PE (5:95)  
 Flow Rate : 0.5ml/min ( Pressure 24Kgf)  
 Wavelength : 230nm  
 Con. : 1mg/0.2ml  
 Inject vol. : 10 uL

Shimadzu CLASS-VP V6.12 SP5  
 Method Name: C:\CLASS-VP\Method ch 2.met  
 Data Name: C:\CLASS-VP\Data\Dr.Ganesh Pandey\gp-1576  
 User: System  
 Acquired: 8/10/11 11:08:07 AM  
 Printed: 8/10/11 1:08:35 PM  
 Sample Name: PAA- NITRO-METHYL-CHIRAL

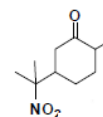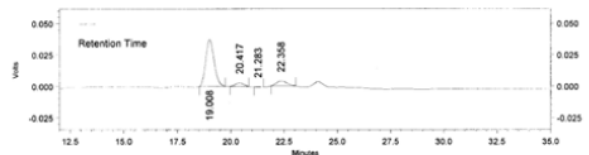

| Retention Time | C Area         | Area %         |
|----------------|----------------|----------------|
| 19.008         | 1035975        | 82.852         |
| 20.417         | 76093          | 6.086          |
| 21.283         | 2147           | 0.172          |
| 22.358         | 136170         | 10.890         |
| <b>Totals</b>  | <b>1250385</b> | <b>100.000</b> |

Project Leader :Dr. Ganesh Pandey  
 Column :Chiralcel-OD-H (4.6x250 mm)  
 Mobile Phase :IPA:PE (5:95)  
 Flow Rate : 0.5ml/min ( Pressure 24Kgf)  
 Wavelength : 230nm  
 Con. : 1mg/0.2ml  
 Inject vol. : 10 uL

Shimadzu CLASS-VP V6.12 SP5

Method Name: C:\CLASS-VP\Method ch 2.met

Data Name: C:\CLASS-VP\Data\Dr.Ganesh Pandey\gp-1424

User: System

Acquired: 6/10/11 12:52:31 PM

Printed: 6/10/11 3:35:33 PM

Sample Name: PAA-ALLYLCYCLOHEXANONE RAC

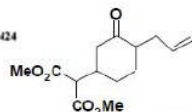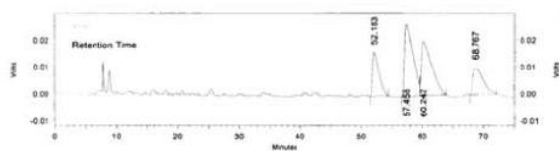

Detector A - I (230nm)

| Retention Time | C Area  | Area % |
|----------------|---------|--------|
| 52.183         | 1222115 | 16.603 |
| 57.425         | 2479045 | 33.643 |
| 60.242         | 2481126 | 33.671 |
| 68.767         | 1185132 | 16.083 |

| Totals | C Area  | Area %  |
|--------|---------|---------|
|        | 7368718 | 100.000 |

Project Leader :Dr.Ganesh Pandey

Column :Chiralcel OJ-H (0.46cm X 25cm)

Mobile Phase :IPA:PE (2:98)

Flow Rate :0.5 ml/min 246psi

Wavelength :230nm

Con. :3mg /0.5ml

Inject vol. :20uL

Kunte

Shimadzu CLASS-VP V6.12 SP5

Method Name: C:\CLASS-VP\Method ch 2.met

Data Name: C:\CLASS-VP\Data\Dr.Ganesh Pandey\gp-1416

User: System

Acquired: 6/10/11 2:09:18 PM

Printed: 6/10/11 3:31:32 PM

Sample Name: PAA-ALLYLCYCLOHEXANONE CHIRAL

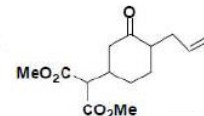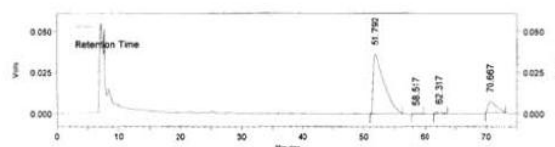

Detector A - I (230nm)

| Retention Time | C Area  | Area % |
|----------------|---------|--------|
| 51.792         | 4738840 | 85.350 |
| 58.517         | 10641   | 0.192  |
| 62.317         | 76365   | 1.375  |
| 70.667         | 726393  | 13.083 |

| Totals | C Area  | Area %  |
|--------|---------|---------|
|        | 5552239 | 100.000 |

Project Leader :Dr.Ganesh Pandey

Column :Chiralcel OJ-H (0.46cm X 25cm)

Mobile Phase :IPA:PE (2:98)

Flow Rate :0.5 ml/min 246psi

Wavelength :230nm

Con. :3mg /0.5ml

Inject vol. :20uL

Kunte

Shimadzu CLASS-VP V6.12 SP5

Method Name: C:\CLASS-VP\Method ch 2.met

Data Name: C:\CLASS-VP\Data\Dr.Ganesh Pandey\gp-1566

User: System

Acquired: 8/9/11 12:07:22 PM

Printed: 8/10/11 10:53:11 AM

Sample Name: PAA-ETHYL-ALLYL HEX RAC

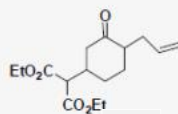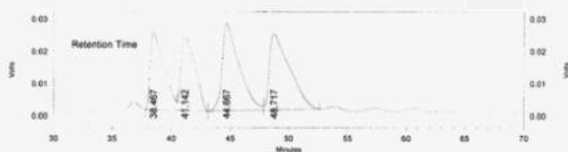

Detector A - I (230nm)

| Retention Time | C Area  | Area % |
|----------------|---------|--------|
| 38.467         | 1973417 | 21.016 |
| 41.142         | 1870465 | 19.920 |
| 44.667         | 2722438 | 29.190 |
| 48.717         | 2813570 | 29.964 |

| Totals | C Area  | Area %  |
|--------|---------|---------|
|        | 9389890 | 100.000 |

Project Leader :Dr. Ganesh Pandey

Column :Chiralcel-OJ-H (4.6x250 mm)

Mobile Phase :IPA:PE (0.5:99.5)

Flow Rate :0.5ml/min ( Pressure25Kgf)

Wavelength :230nm

Con. :1mg/0.2ml

Inject vol. :20 uL

Shimadzu CLASS-VP V6.12 SP5

Method Name: C:\CLASS-VP\Method ch 2.met

Data Name: C:\CLASS-VP\Data\Dr.Ganesh Pandey\gp-1568

User: System

Acquired: 8/9/11 2:32:43 PM

Printed: 8/10/11 11:00:58 AM

Sample Name: PAA-ETHYL-ALLYL HEX chiral

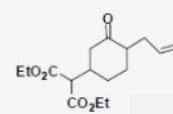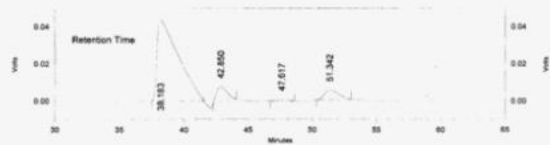

Detector A - I (230nm)

| Retention Time | C Area  | Area % |
|----------------|---------|--------|
| 38.183         | 5013488 | 84.724 |
| 42.850         | 462574  | 7.817  |
| 47.617         | 51877   | 0.877  |
| 51.342         | 389518  | 6.583  |

| Totals | C Area  | Area %  |
|--------|---------|---------|
|        | 5917457 | 100.000 |

Project Leader :Dr. Ganesh Pandey

Column :Chiralcel-OJ-H (4.6x250 mm)

Mobile Phase :IPA:PE (0.5:99.5)

Flow Rate :0.5ml/min ( Pressure25Kgf)

Wavelength :230nm

Con. :1mg/0.2ml

Inject vol. :20 uL

Shimadzu CLASS-VP V6.12 SP5  
 Method Name: C:\CLASS-VP\Method ch 2.met  
 Data Name: C:\CLASS-VP\Data\Dr.Ganesh Pandey\gp-1605  
 User: System  
 Acquired: 8/24/11 2:19:58 PM  
 Printed: 8/24/11 4:29:12 PM  
 Sample Name: PAA-ETHYL-ETHYL RAC

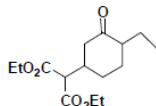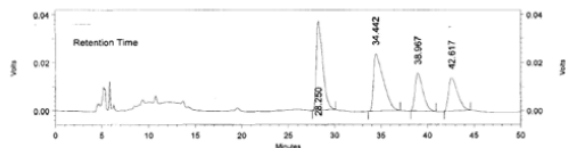

| Retention Time | C Area         | Area %         |
|----------------|----------------|----------------|
| 28.250         | 1785509        | 33.076         |
| 34.442         | 1757288        | 32.553         |
| 38.967         | 927855         | 17.188         |
| 42.817         | 927540         | 17.182         |
| <b>Totals</b>  | <b>5398192</b> | <b>100.000</b> |

Project Leader :Dr. Ganesh Pandey  
 Column :Kromasil 5-AmyCoat (4.6x250 mm)  
 Mobile Phase :EtOH:n-Hexane (02:98.0)  
 Flow Rate : 0.7ml/min ( Pressure 445psi)  
 Wavelength : 230 nm  
 Con. : 1mg/0.2ml  
 Inject vol. :20uL

Shimadzu CLASS-VP V6.12 SP5  
 Method Name: C:\CLASS-VP\Method ch 2.met  
 Data Name: C:\CLASS-VP\Data\Dr.Ganesh Pandey\gp-1606  
 User: System  
 Acquired: 8/24/11 3:12:11 PM  
 Printed: 8/24/11 4:31:51 PM  
 Sample Name: PAA-ETHYL-ETHYL Chiral

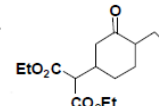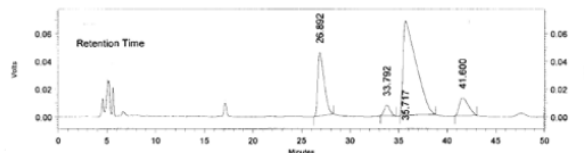

| Retention Time | C Area         | Area %         |
|----------------|----------------|----------------|
| 26.892         | 2072160        | 21.747         |
| 33.792         | 314032         | 3.296          |
| 35.717         | 6312377        | 66.246         |
| 41.600         | 830067         | 8.711          |
| <b>Totals</b>  | <b>9528636</b> | <b>100.000</b> |

Project Leader :Dr. Ganesh Pandey  
 Column :Kromasil 5-AmyCoat (4.6x250 mm)  
 Mobile Phase :EtOH:n-Hexane (02:98.0)  
 Flow Rate : 0.7ml/min ( Pressure 445psi)  
 Wavelength : 230 nm  
 Con. : 1mg/0.2ml  
 Inject vol. :20uL

Shimadzu CLASS-VP V6.12 SP5  
 Method Name: C:\CLASS-VP\Method ch 2.met  
 Data Name: C:\CLASS-VP\Data\Dr.Ganesh Pandey\gp-1474  
 User: System  
 Acquired: 6/28/11 9:59:46 AM  
 Printed: 6/29/11 5:45:33 PM  
 Sample Name: PAA- pentane racemic

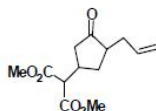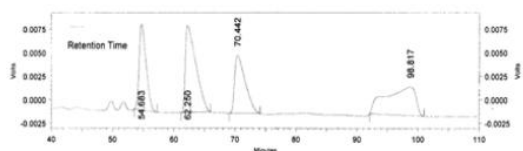

| Retention Time | C Area         | Area %         |
|----------------|----------------|----------------|
| 54.683         | 712108         | 20.003         |
| 62.250         | 1094488        | 30.744         |
| 70.442         | 740369         | 20.797         |
| 98.817         | 1013077        | 28.457         |
| <b>Totals</b>  | <b>3560042</b> | <b>100.000</b> |

Project Leader :Dr. Ganesh Pandey  
 Column :Chiralpak AS-H (4.6x250 mm)  
 Mobile Phase :IPA : PE (2.0:98.0)  
 Flow Rate : 0.5ml/min ( Pressure 235kgf)  
 Wavelength : 230nm  
 Con. : 2mg/0.5ml  
 Inject vol. :20uL

Shimadzu CLASS-VP V6.12 SP5  
 Method Name: C:\CLASS-VP\Method ch 2.met  
 Data Name: C:\CLASS-VP\Data\Dr.Ganesh Pandey\gp-1473  
 User: System  
 Acquired: 6/28/11 8:17:10 AM  
 Printed: 6/29/11 5:37:39 PM  
 Sample Name: PAA- pentane chiral

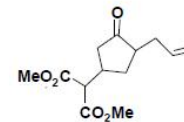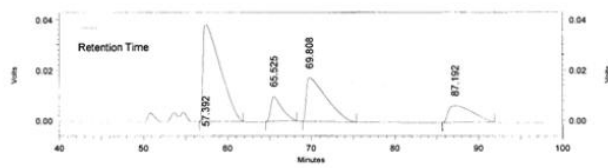

| Retention Time | C Area          | Area %         |
|----------------|-----------------|----------------|
| 57.392         | 5475348         | 51.559         |
| 65.525         | 917351          | 8.638          |
| 69.808         | 2865756         | 26.985         |
| 87.192         | 1361180         | 12.818         |
| <b>Totals</b>  | <b>10619635</b> | <b>100.000</b> |

Project Leader :Dr. Ganesh Pandey  
 Column :Chiralpak AS-H (4.6x250 mm)  
 Mobile Phase :IPA : PE (2.0:98.0)  
 Flow Rate : 0.5ml/min ( Pressure 235kgf)  
 Wavelength : 230nm  
 Con. : 2mg/0.5ml  
 Inject vol. :20uL



Shimadzu CLASS-VP V6.12 SP5

Method Name: C:\CLASS-VP\Method ch 2.met  
 Data Name: C:\CLASS-VP\Data\Dr.Ganesh Pandey\gp-1525  
 User: System  
 Acquired: 7/14/11 3:13:26 PM  
 Printed: 7/14/11 5:27:44 PM  
 Sample Name: PAA-OCTANE Rac

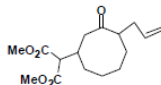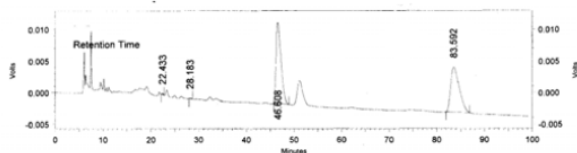

| Retention Time | C Area         | Area %         |
|----------------|----------------|----------------|
| 22.433         | 3700           | 0.207          |
| 28.183         | 3500           | 0.196          |
| 46.608         | 895689         | 50.118         |
| 83.592         | 884283         | 49.479         |
| <b>Totals</b>  | <b>1787172</b> | <b>100.000</b> |

Project Leader :Dr. Ganesh Pandey  
 Column :Kromasil 5-AmyCoat (4.6x250 mm)  
 Mobile Phase :EtOH : n-Hexane (02:98)  
 Flow Rate : 0.5ml/min ( Pressure 26kgf)  
 Wavelength : 230nm  
 Con. : 1mg/0.2ml  
 Inject vol. :20uL

Kunte

Shimadzu CLASS-VP V6.12 SP5

Method Name: C:\CLASS-VP\Method ch 2.met  
 Data Name: C:\CLASS-VP\Data\Dr.Ganesh Pandey\gp-1524  
 User: System  
 Acquired: 7/14/11 1:27:55 PM  
 Printed: 7/14/11 3:11:25 PM  
 Sample Name: PAA-OCTANE CHIRAL

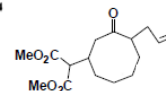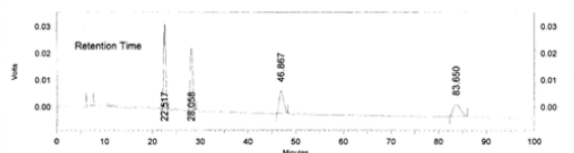

| Retention Time | C Area         | Area %         |
|----------------|----------------|----------------|
| 22.517         | 887523         | 31.971         |
| 28.058         | 873897         | 31.480         |
| 46.867         | 529112         | 19.060         |
| 83.650         | 485489         | 17.489         |
| <b>Totals</b>  | <b>2776021</b> | <b>100.000</b> |

Project Leader :Dr. Ganesh Pandey  
 Column :Kromasil 5-AmyCoat (4.6x250 mm)  
 Mobile Phase :EtOH : n-Hexane (02:98)  
 Flow Rate : 0.5ml/min ( Pressure 26kgf)  
 Wavelength : 230nm  
 Con. : 1mg/0.2ml  
 Inject vol. :20uL

Kunte

Shimadzu CLASS-VP V6.12 SP5

Method Name: C:\CLASS-VP\Method ch 2.met  
 Data Name: C:\CLASS-VP\Data\Dr.Ganesh Pandey\gp-1595  
 User: System  
 Acquired: 8/19/11 11:40:18 AM  
 Printed: 8/19/11 6:05:23 PM  
 Sample Name: PAA-methyl acyclic

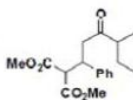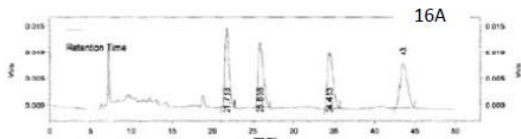

| Retention Time | C Area         | Area %         |
|----------------|----------------|----------------|
| 21.733         | 505982         | 25.065         |
| 24.838         | 335493         | 16.641         |
| 34.433         | 497050         | 24.623         |
| 43.542         | 310137         | 15.271         |
| <b>Totals</b>  | <b>2018662</b> | <b>100.000</b> |

Project Leader :Dr. Ganesh Pandey  
 Column :Kromasil 5-Amycoat (4.6x250 mm)  
 Mobile Phase :EtOH:n-Hexane (07:93)  
 Flow Rate : 0.5ml/min ( Pressure 30 kgf)  
 Wavelength : 230 nm  
 Con. : 2mg/0.5ml  
 Inject vol. :20uL

Shimadzu CLASS-VP V6.12 SP5

Method Name: C:\CLASS-VP\Method ch 2.met  
 Data Name: C:\CLASS-VP\Data\Dr.Ganesh Pandey\gp-1596  
 User: System  
 Acquired: 8/19/11 12:39:24 PM  
 Printed: 8/19/11 6:09:14 PM  
 Sample Name: PAA-methyl acyclic-Chiral

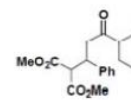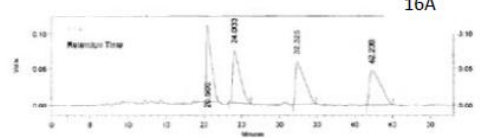

| Retention Time | C Area          | Area %         |
|----------------|-----------------|----------------|
| 20.500         | 4952682         | 25.245         |
| 24.037         | 4816357         | 24.550         |
| 32.322         | 3103221         | 16.012         |
| 42.233         | 4745929         | 24.191         |
| <b>Totals</b>  | <b>19618189</b> | <b>100.000</b> |

Project Leader :Dr. Ganesh Pandey  
 Column :Kromasil 5-Amycoat (4.6x250 mm)  
 Mobile Phase :EtOH:n-Hexane (07:93)  
 Flow Rate : 0.5ml/min ( Pressure 30 kgf)  
 Wavelength : 230 nm  
 Con. : 2mg/0.5ml  
 Inject vol. :20uL

## Reference:

1. K. C. Nicolaou, D. L. F. Gray, T. Montagnon, S. T. Harrison, *Angew. Chem. Int. Ed.*, 2002, **41**, 996.
